# Supplementary material
Source: PubMed Central journal article supplement (PMC3286931)
Supplement: 1120589109_Appendix.pdf [file 1120589109_Appendix.pdf]

## Supporting Information

### STK33 kinase inhibitor BRD-8899 has no effect on KRAS-dependent cancer cell

#### viability

Tuoping Luo<sup>a,b,1</sup>, Kristina Masson<sup>a,1</sup>, Jacob D. Jaffe<sup>a</sup>, Whitney Silkworth<sup>a</sup>, Nathan T. Ross<sup>a,c</sup>, Christina A. Scherer<sup>a</sup>, Claudia Scholl<sup>d</sup>, Stefan Fröhling<sup>d</sup>, Steven A. Carr<sup>a</sup>, Andrew M. Stern<sup>a</sup>, Stuart L. Schreiber<sup>a,b,e,2</sup> and Todd R. Golub<sup>a,e,f,2</sup>

<sup>a</sup> Broad Institute of Harvard and MIT, 7 Cambridge Center, Cambridge, MA 02142 USA.

<sup>b</sup> Department of Chemistry and Chemical Biology, Harvard University, Cambridge, MA 02138 USA

<sup>c</sup> Current address: Novartis Institutes for BioMedical Research, 250 Massachusetts Avenue, Cambridge, MA 02142 USA.

<sup>d</sup> Department of Internal Medicine III, University Hospital of Ulm, 89081 Ulm, Germany.

<sup>e</sup> Howard Hughes Medical Institute, Bethesda, MD 208817 USA.

<sup>f</sup> Department of Pediatric Oncology, Dana-Farber Cancer Institute, Harvard Medical School, Boston, MA 02215 USA.

<sup>1</sup> These authors contributed equally to this work.

<sup>2</sup> To whom correspondence should be addressed. Stuart L. Schreiber tel: (617) 714-7080, fax: (617) 714-8969, [stuart\\_schreiber@harvard.edu](mailto:stuart_schreiber@harvard.edu), Todd R. Golub, tel: (617) 714-7050, fax: (617) 714-7059, [golub@broadinstitute.org](mailto:golub@broadinstitute.org)

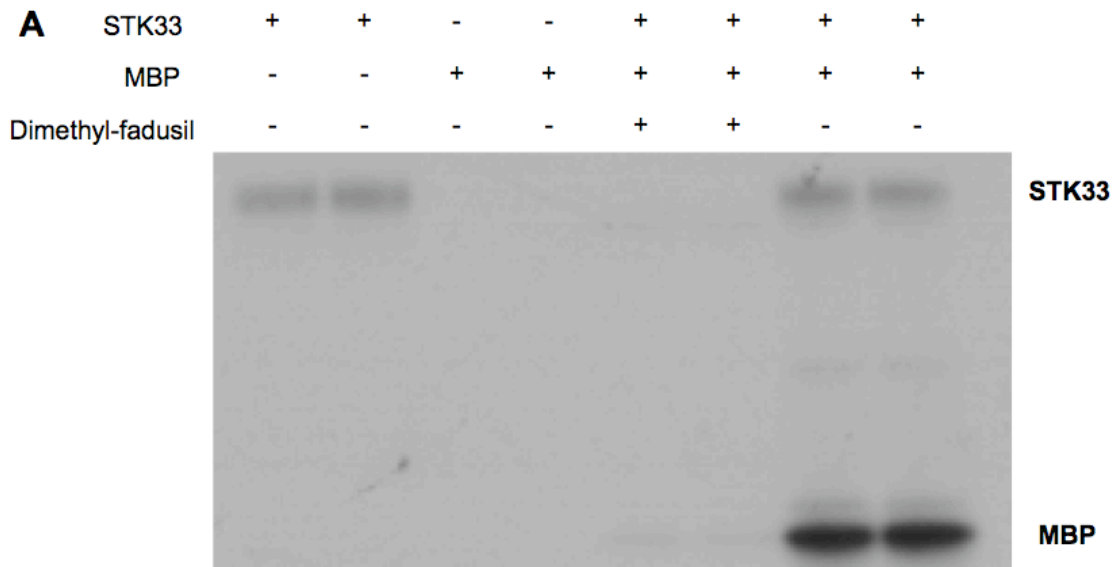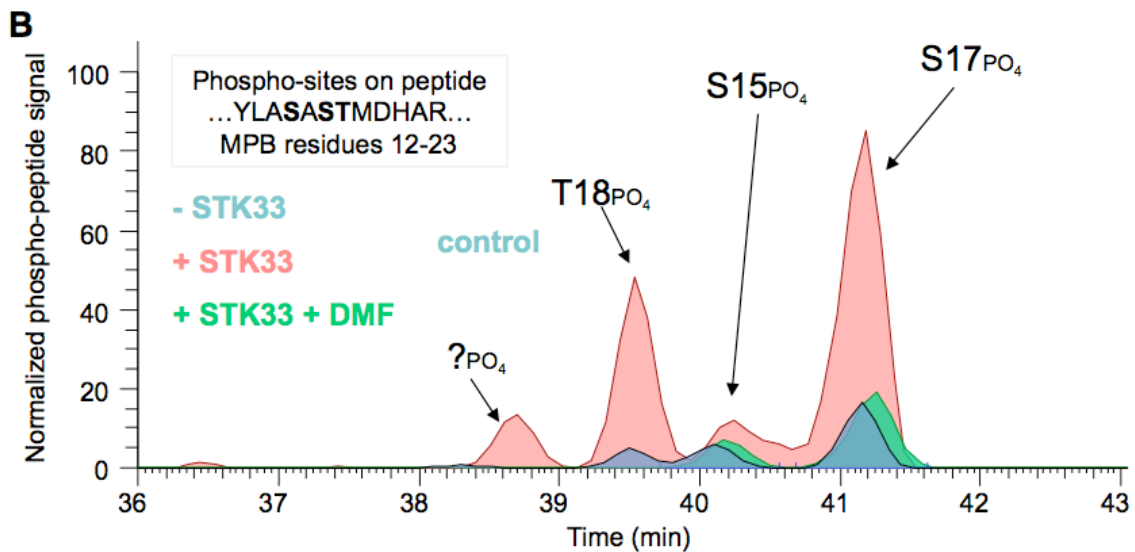

**Figure S1.** (A) Radiolabeled experiment confirming MBP phosphorylation and STK33 autophosphorylation. Kinase reactions were performed with 38.4 nM STK33, 24.5  $\mu$ M MBP, and 100  $\mu$ M ATP (28.6  $\mu$ Ci/mL [ $\gamma$ - $^{32}$ P]-ATP). Reactions were initiated by the addition of ATP and incubated at 24  $^{\circ}$ C for 60 minutes. (B) Mass spectrometry data confirming phosphorylation of MBP by STK33. Kinase reactions were performed with 38.4 nM STK33, 24.5  $\mu$ M MBP, and 100  $\mu$ M ATP, in the absence and presence of 20  $\mu$ M dimethylfasudil (DMF, **BRD7446**).

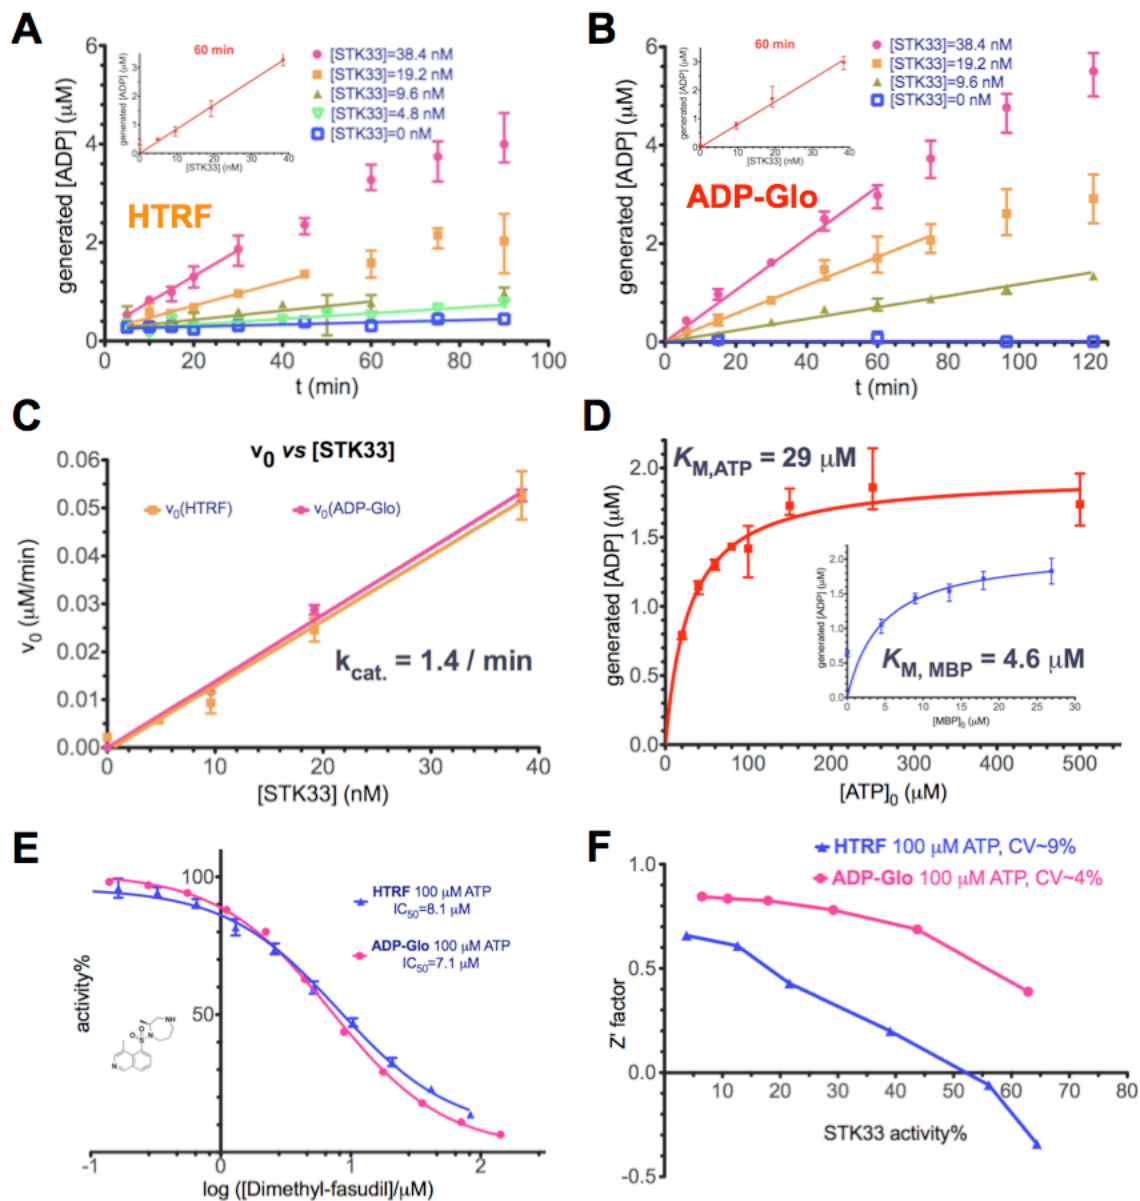

**Figure S2.** (A) The generation of ADP as a function of time and STK33 concentration (HTRF); (B) the generation of ADP as a function of time and STK33 concentration (ADP-Glo); (C) the initial velocity as a function of STK33 concentration; (D) determination of  $K_M$ ; (E) dose-response curves of dimethyl fasudil; (F) Z' factors. Kinase reactions were performed with 38.4 nM STK33, 24.5  $\mu\text{M}$  MBP, and 100  $\mu\text{M}$  or 500  $\mu\text{M}$  ATP. Reactions were initiated by the addition of ATP and incubated at 24  $^{\circ}\text{C}$  for 60~70 minutes. The error bars represent the range of 12 replicate values.

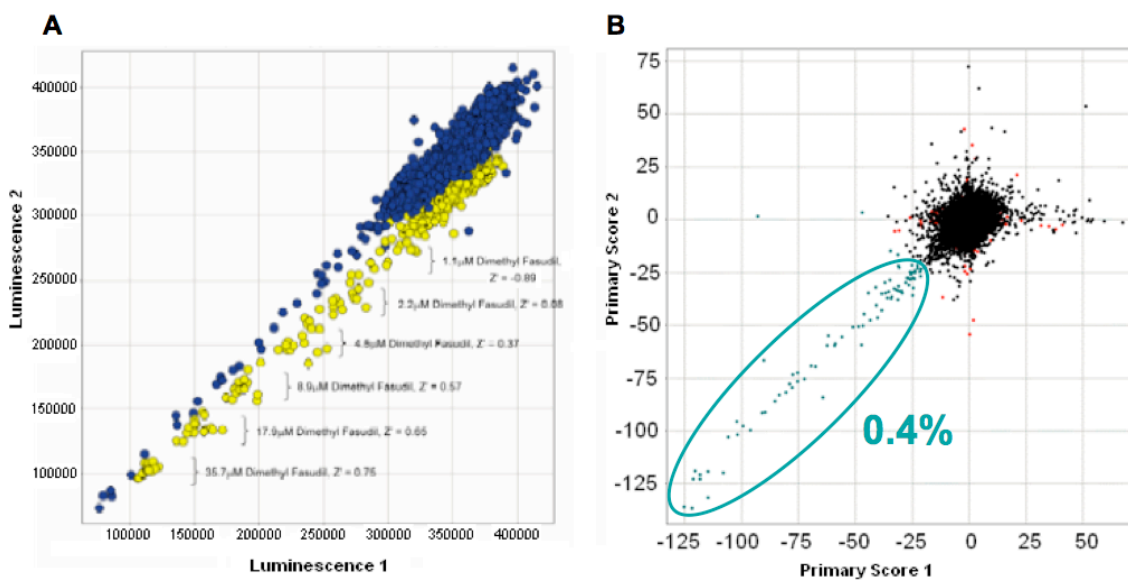

**Figure S3.** Results of plate replicates from the high throughput *in vitro* kinase screen. (A) Screen of 2,240 compounds under 100  $\mu\text{M}$  ATP as a validation set, dimethyl fasudil is shown in yellow; (B) HTS screen of 27,500 compounds under 100  $\mu\text{M}$  ATP, negative control DMSO is shown in red, and primary hits are shown in green. The hit rate is 0.4%. Negative control (DMSO) is scaled to 0, whereas positive control (89  $\mu\text{M}$  dimethyl fasudil, 90% inhibition) is scaled to -100.

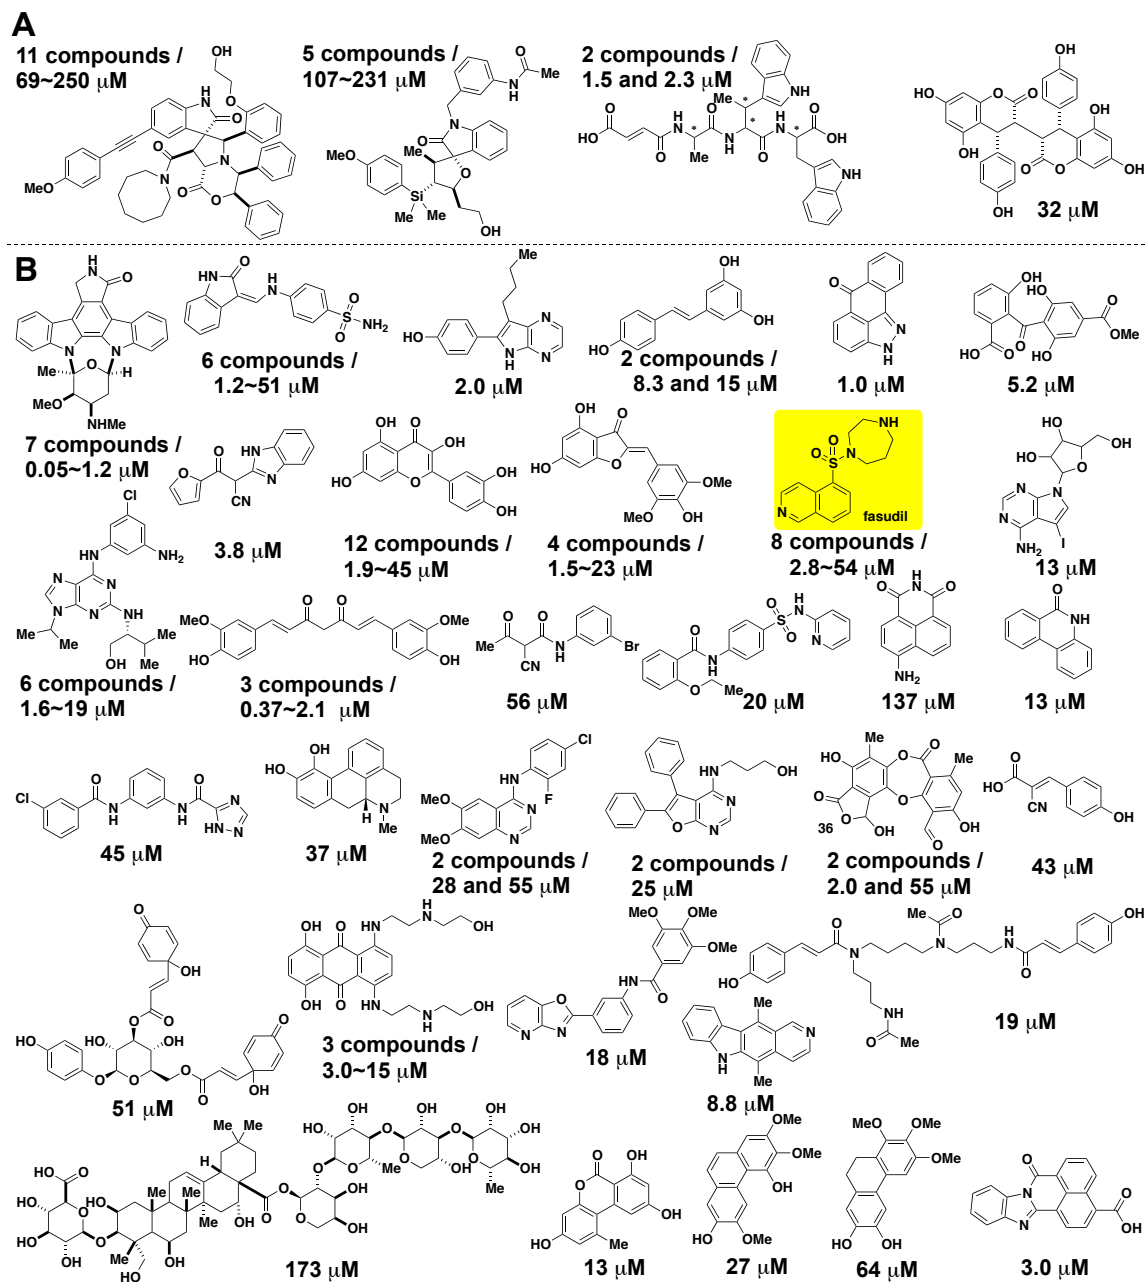

**Figure S4.** Clustering of primary hits and  $\text{IC}_{50}$  under 25  $\mu\text{M}$  ATP. (A) ATP-noncompetitive inhibitors; (B) representative ATP-competitive inhibitors.

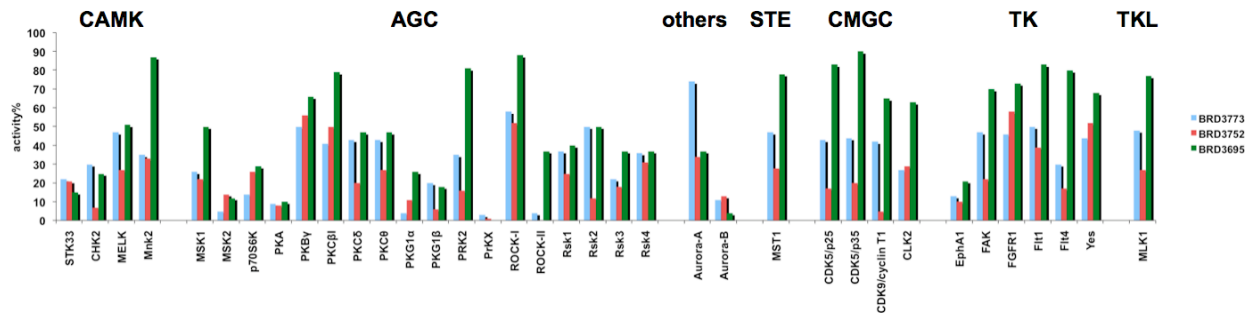

**Figure S5.** Biochemical kinase profiling of compounds **BRD3773**, **BRD3752** and **BRD3695** (2.5  $\mu$ M) against 36 kinases under  $[ATP]=K_{M,ATP}$ . Y axial: the percent of kinase activity remained in the presence of the inhibitor.

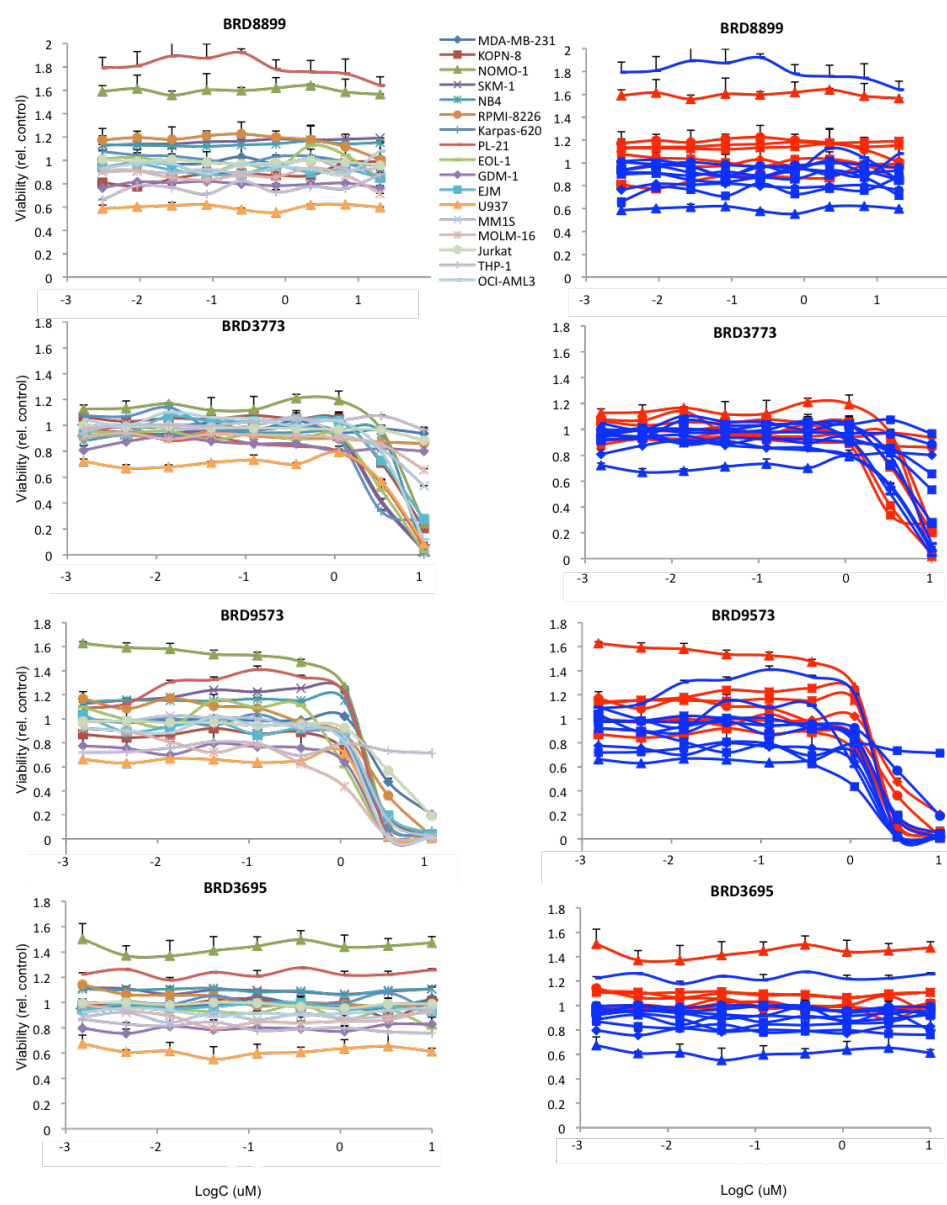

**Figure S6. Cell viability assay for fasudil analogs BRD8899, BRD3773, BRD9573 and BRD3695.** Dose-response curves of the indicated cell lines using CellTiter Glo as a measurement for viability. The luminescence values of each compound treatment divided by the median of all DMSO values for each individual cell line was taken as a measurement of relative viability. Error bars represent the standard deviation of three replicates. Curves to the left are color coded based on cell line and the right ones are the same plots, but showing KRAS mutant and KRAS wild-type cell lines depicted in red or blue, respectively.

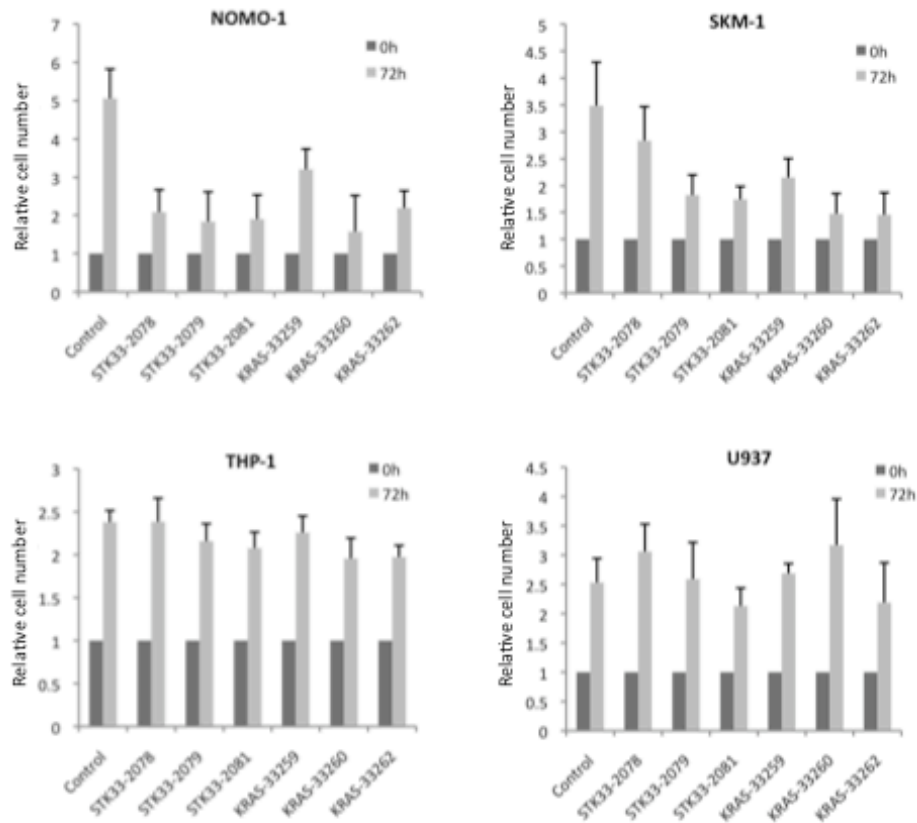

**Figure S7. Effects of different *STK33* and *KRAS* shRNAs on cell viability.** NOMO-1, SKM-1 (*KRAS* mutant), THP-1 and U937 (*KRAS* wild type) cells were transduced with shRNAs constructs targeting different regions of the *STK33* or *KRAS* transcripts, as well as with a nontargeting control shRNA. Cell number was measured using CellTiter Glo on days 4 (0 h) and 8 (72 h) post transduction. Experiments were performed in triplicate. All samples are normalized to time point 0h and are represented as mean  $\pm$  SEM.



**Table S1.** Compound sources

| Library Name                              | Compound Number | Hit Number |
|-------------------------------------------|-----------------|------------|
| Commercial collection                     | 1280            | 1          |
| Natural products                          | 1920            | 41         |
| Bioactives                                | 2560            | 61         |
| Structural diversity (DOS)                | 960             | 0          |
| Chemical biology library initiative (DOS) | 9600            | 0          |
| Kinase-biased                             | 11520           | 8          |

**Table S2.**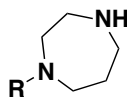

| R                 | IC <sub>50</sub> (μM)<br>@ 25 μM ATP | IC <sub>50</sub> (μM)<br>@ 100 μM ATP | R                      | IC <sub>50</sub> (μM)<br>@ 25 μM ATP | IC <sub>50</sub> (μM)<br>@ 100 μM ATP |
|-------------------|--------------------------------------|---------------------------------------|------------------------|--------------------------------------|---------------------------------------|
| <br>BRD5288       | >186                                 | >186                                  | <br>fasudil<br>BRD7868 | 14                                   | 29                                    |
| <br>BRD1651       | >186                                 | >186                                  | <br>BRD6825            | 5.3                                  | 11                                    |
| <br>BRD4469<br>Me | >186                                 | >186                                  | <br>BRD0811            | >186                                 | >186                                  |

Table S3.

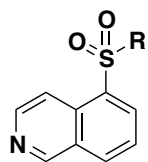

| R | IC <sub>50</sub> (μM)<br>@ 25 μM ATP | IC <sub>50</sub> (μM)<br>@ 100 μM ATP | R | IC <sub>50</sub> (μM)<br>@ 25 μM ATP | IC <sub>50</sub> (μM)<br>@ 100 μM ATP |
|---|--------------------------------------|---------------------------------------|---|--------------------------------------|---------------------------------------|
|   | <b>&gt;186</b><br>BRD2998            | <b>&gt;186</b>                        |   | <b>29</b><br>BRD2751                 | <b>64</b>                             |
|   | <b>110</b><br>BRD4220                | <b>&gt;186</b>                        |   | <b>&gt;186</b><br>BRD7527            | <b>&gt;186</b>                        |
|   | <b>&gt;186</b><br>BRD7390            | <b>&gt;186</b>                        |   | <b>&gt;186</b><br>BRD9836            | <b>&gt;186</b>                        |
|   | <b>&gt;186</b><br>BRD6818            | <b>&gt;186</b>                        |   | <b>26</b><br>BRD3518                 | <b>60</b>                             |
|   | <b>&gt;186</b><br>BRD0188            | <b>&gt;186</b>                        |   | <b>36</b><br>BRD9802                 | <b>175</b>                            |

Table S4.

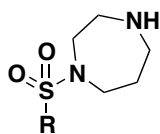

| R | IC <sub>50</sub> (μM)<br>@ 25 μM ATP | IC <sub>50</sub> (μM)<br>@ 100 μM ATP | R | IC <sub>50</sub> (μM)<br>@ 25 μM ATP | IC <sub>50</sub> (μM)<br>@ 100 μM ATP |
|---|--------------------------------------|---------------------------------------|---|--------------------------------------|---------------------------------------|
|   | <b>0.19</b>                          | <b>0.56</b>                           |   | <b>12</b>                            | <b>26</b>                             |
|   | <b>&gt;186</b>                       | <b>&gt;186</b>                        |   | <b>9.1</b>                           | <b>20</b>                             |
|   | <b>30</b>                            | <b>51</b>                             |   | <b>176</b>                           | <b>205</b>                            |

Table S5.

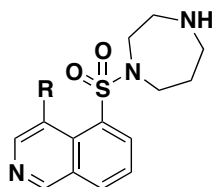

| R                                                                                                         | IC <sub>50</sub> (μM)<br>@ 25 μM ATP | IC <sub>50</sub> (μM)<br>@ 100 μM ATP | R                                                                                                                 | IC <sub>50</sub> (μM)<br>@ 25 μM ATP | IC <sub>50</sub> (μM)<br>@ 100 μM ATP |
|-----------------------------------------------------------------------------------------------------------|--------------------------------------|---------------------------------------|-------------------------------------------------------------------------------------------------------------------|--------------------------------------|---------------------------------------|
|  H<br>fasudil<br>BRD7868 | <b>14</b>                            | <b>29</b>                             |  Br<br>BRD8880                   | <b>24</b>                            | <b>49</b>                             |
|  Me<br>BRD3773           | <b>0.19</b>                          | <b>0.56</b>                           |  NH <sub>2</sub><br>BRD2749      | <b>21</b>                            | <b>39</b>                             |
|  Me<br>BRD5930           | <b>0.28</b>                          | <b>0.81</b>                           |  HO<br>BRD7648                   | <b>21</b>                            | <b>71</b>                             |
| <br>BRD5796              | <b>0.24</b>                          | <b>0.68</b>                           |  OH<br>BRD5505                   | <b>95</b>                            | <b>203</b>                            |
|  F F<br>BRD8757          | <b>0.48</b>                          | <b>1.1</b>                            |  O<br>BRD4734                    | <b>6.9</b>                           | <b>18</b>                             |
| <br>BRD7032             | <b>0.94</b>                          | <b>2.9</b>                            |  Me<br>O NH<br>N<br>BRD0859    | <b>26</b>                            | <b>74</b>                             |
|  Me<br>BRD7132         | <b>1.6</b>                           | <b>3.2</b>                            |  CO <sub>2</sub> Me<br>BRD7198 | <b>13</b>                            | <b>44</b>                             |
|  Me<br>BRD9078         | <b>4.0</b>                           | <b>8.6</b>                            |                                                                                                                   |                                      |                                       |

Table S6.

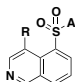

| A | Compound         | IC <sub>50</sub> (μM)<br>@ 25 μM ATP | IC <sub>50</sub> (μM)<br>@ 100 μM ATP | A | Compound         | IC <sub>50</sub> (μM)<br>@ 25 μM ATP | IC <sub>50</sub> (μM)<br>@ 100 μM ATP | A | Compound         | IC <sub>50</sub> (μM)<br>@ 25 μM ATP | IC <sub>50</sub> (μM)<br>@ 100 μM ATP |
|---|------------------|--------------------------------------|---------------------------------------|---|------------------|--------------------------------------|---------------------------------------|---|------------------|--------------------------------------|---------------------------------------|
|   | BRD7657 (R = H)  | 14                                   | 29                                    |   | BRD7868 (R = H)  | 14                                   | 29                                    |   | BRD2246 (R = H)  | 201                                  | >714                                  |
|   | BRD5549 (R = Me) | 1.6                                  | 3.2                                   |   | BRD3773 (R = Me) | 0.19                                 | 0.56                                  |   | BRD7471 (R = Me) | 4.2                                  | 11                                    |
|   | BRD4220 (R = H)  | 110                                  | >186                                  |   | BRD7364 (R = H)  | 71                                   | >186                                  |   | BRD2751 (R = H)  | 29                                   | 64                                    |
|   | BRD3610 (R = Me) | 11                                   | 25                                    |   | BRD9027 (R = Me) | 1.7                                  | 4.1                                   |   | BRD9575 (R = Me) | 0.79                                 | 1.9                                   |
|   | BRD4153 (R = H)  | >186                                 | >186                                  |   | BRD0322 (R = H)  | 23                                   | 30                                    |   | BRD2297 (R = H)  | 16                                   | 31                                    |
|   | BRD9391 (R = Me) | 52                                   | >186                                  |   | BRD5419 (R = Me) | 1.2                                  | 2.1                                   |   | BRD4942 (R = Me) | 1.4                                  | 4.2                                   |
|   | BRD7647 (R = H)  | 2.2                                  | 6.6                                   |   | BRD0112 (R = H)  | 15                                   | 46                                    |   | BRD0841 (R = H)  | 6.1                                  | 16                                    |
|   | BRD9330 (R = Me) | 2.1                                  | 4.6                                   |   | BRD9740 (R = Me) | 2.0                                  | 3.6                                   |   | BRD3376 (R = Me) | 1.6                                  | 2.6                                   |
|   | BRD4009 (R = H)  | 1.0                                  | 2.1                                   |   | (R = H)          | --                                   | --                                    |   | BRD1199 (R = H)  | 62                                   | >186                                  |
|   | BRD3407 (R = Me) | 3.7                                  | 6.4                                   |   | BRD1742 (R = Me) | 2.7                                  | 5.3                                   |   | BRD3436 (R = Me) | 1.2                                  | 2.8                                   |
|   | BRD8531 (R = H)  | 46                                   | 98                                    |   | BRD3590 (R = H)  | 9.3                                  | 24                                    |   | BRD3033 (R = H)  | 13                                   | 31                                    |
|   | BRD6995 (R = Me) | 1.8                                  | 4.7                                   |   | BRD3752 (R = Me) | 0.047                                | 0.13                                  |   | BRD2668 (R = Me) | 2.6                                  | 5.6                                   |
|   | BRD9091 (R = H)  | >186                                 | >186                                  |   | BRD3490 (R = H)  | 16                                   | 41                                    |   | BRD0561 (R = H)  | 36                                   | 78                                    |
|   | BRD7177 (R = Me) | 35                                   | 89                                    |   | BRD0828 (R = Me) | 3.7                                  | 13                                    |   | BRD4209 (R = Me) | 0.99                                 | 1.5                                   |
|   | BRD5149 (R = H)  | 8.6                                  | 16                                    |   | BRD3501 (R = H)  | 7.1                                  | 16                                    |   | BRD3518 (R = H)  | 26                                   | 60                                    |
|   | BRD8198 (R = Me) | 2.8                                  | 6.6                                   |   | BRD3695 (R = Me) | 0.063                                | 0.17                                  |   | BRD2986 (R = Me) | 1.2                                  | 2.8                                   |
|   | BRD4958 (R = H)  | 7.4                                  | 19                                    |   | BRD8943 (R = H)  | 10                                   | 39                                    |   | BRD5717 (R = H)  | 38                                   | 96                                    |
|   | BRD3966 (R = Me) | 0.29                                 | 0.57                                  |   | BRD9573 (R = Me) | 4.8                                  | 10                                    |   | BRD7682 (R = Me) | 7.9                                  | 16                                    |
|   | (R = H)          | --                                   | --                                    |   | BRD7481 (R = H)  | 397                                  | >714                                  |   | BRD2594 (R = H)  | 16                                   | 47                                    |
|   | BRD9325 (R = Me) | 0.65                                 | 1.2                                   |   | (R = Me)         | --                                   | --                                    |   | BRD5731 (R = Me) | 2.3                                  | 5.1                                   |
|   | BRD5991 (R = H)  | 19                                   | 42                                    |   | BRD7425 (R = H)  | >714                                 | >714                                  |   |                  |                                      |                                       |
|   | BRD5337 (R = Me) | 0.84                                 | 1.3                                   |   | (R = Me)         | --                                   | --                                    |   |                  |                                      |                                       |

**Table S7.**

| Kinase               | activity% | Kinase           | activity% | Kinase                     | activity% | Kinase                | activity% |
|----------------------|-----------|------------------|-----------|----------------------------|-----------|-----------------------|-----------|
| PrkX(h)              | 3         | ALK4(h)          | 70        | ASK1(h)                    | 95        | PDGFRβ(h)             | 105       |
| PKG1α(h)             | 4         | SGK2(h)          | 70        | MAPKAP-K2(h)               | 95        | HIPK2(h)              | 106       |
| ROCK-II(h)           | 4         | Fyn(h)           | 71        | NEK11(h)                   | 95        | HIPK3(h)              | 106       |
| MSK2(h)              | 5         | CaMKIIβ(h)       | 72        | TrkB(h)                    | 95        | IKKα(h)               | 106       |
| PKA(h)               | 9         | FGFR2(h)         | 72        | IGF-1R(h)                  | 96        | MAPK1(h)              | 106       |
| Aurora-B(h)          | 11        | Phkγ2(h)         | 72        | IKKβ(h)                    | 96        | PKCγ(h)               | 106       |
| EphA1(h)             | 13        | CaMKIIδ(h)       | 73        | PKBa(h)                    | 96        | Src(T341M)(h)         | 106       |
| p70S6K(h)            | 14        | EphA2(h)         | 73        | WNK3(h)                    | 96        | Abi(h)                | 107       |
| PKG1β(h)             | 20        | Plk3(h)          | 73        | EphA8(h)                   | 97        | EGFR(h)               | 107       |
| Rsk3(h)              | 22        | Aurora-A(h)      | 74        | JAK3(h)                    | 97        | HIPK1(h)              | 107       |
| STK33(h)             | 22        | GRK5(h)          | 74        | Rse(h)                     | 97        | MAPK2(h)              | 107       |
| MSK1(h)              | 26        | ARK5(h)          | 76        | SRPK1(h)                   | 97        | NEK7(h)               | 107       |
| CLK2(h)              | 27        | Lyn(h)           | 77        | WNK2(h)                    | 97        | PAK2(h)               | 107       |
| CHK2(h)              | 30        | GRK6(h)          | 79        | CDK6/cyclinD3(h)           | 98        | PIP4K2α(h)            | 107       |
| Flt4(h)              | 30        | TAO3(h)          | 81        | IRR(h)                     | 98        | PRAK(h)               | 107       |
| Mnk2(h)              | 35        | CLK3(h)          | 82        | PIP5K1α(h)                 | 98        | ALK(h)                | 108       |
| PRK2(h)              | 35        | FGFR4(h)         | 82        | Ron(h)                     | 98        | IR(h), activated      | 108       |
| Rsk4(h)              | 36        | BrSK1(h)         | 84        | CaMKIIγ(h)                 | 99        | MSSK1(h)              | 108       |
| Rsk1(h)              | 37        | CDK2/cyclinE(h)  | 84        | DYRK2(h)                   | 99        | PAK4(h)               | 108       |
| PKCβII(h)            | 41        | JNK3(h)          | 84        | Fer(h)                     | 99        | PDGFRα(h)             | 108       |
| CDK9/cyclin T1(h)    | 42        | Lck(h)           | 84        | PI3 Kinase (p110β/p85α)(h) | 99        | PI3 Kinase (p120γ)(h) | 108       |
| CDK5/p25(h)          | 43        | PI3KC2α(h)       | 84        | PIP5K1γ(h)                 | 99        | CK1γ2(h)              | 109       |
| PKCδ(h)              | 43        | CaMKIV(h)        | 85        | PKBβ(h)                    | 99        | DAPK2(h)              | 109       |
| PKCθ(h)              | 43        | MST2(h)          | 85        | TAO2(h)                    | 99        | mTOR/FKBP12(h)        | 109       |
| CDK5/p35(h)          | 44        | Axl(h)           | 86        | TBK1(h)                    | 99        | ACK1(h)               | 110       |
| Yes(h)               | 44        | BRK(h)           | 86        | Tec(h) activated           | 99        | CSK(h)                | 110       |
| FGFR1(h)             | 46        | cSRC(h)          | 87        | TLK2(h)                    | 99        | MEK1(h)               | 110       |
| FAK(h)               | 47        | PAK3(h)          | 87        | Arg(h)                     | 100       | NEK6(h)               | 110       |
| MELK(h)              | 47        | Snk(h)           | 87        | SAPK2b(h)                  | 100       | PAK6(h)               | 110       |
| MST1(h)              | 47        | CDK1/cyclinB(h)  | 88        | BTk(h)                     | 101       | CK1γ3(h)              | 111       |
| MLK1(h)              | 48        | MARK1(h)         | 88        | DMPK(h)                    | 101       | CK2α2(h)              | 111       |
| Flt1(h)              | 50        | MST3(h)          | 88        | EphA4(h)                   | 101       | DAPK1(h)              | 111       |
| PKBγ(h)              | 50        | PDK1(h)          | 88        | Flt3(h)                    | 101       | ZAP-70(h)             | 111       |
| Rsk2(h)              | 50        | ULK2(h)          | 88        | Hck(h) activated           | 101       | CaMKI(h)              | 112       |
| AMPKα2(h)            | 51        | VRK2(h)          | 88        | MAPKAP-K3(h)               | 101       | SAPK2a(h)             | 112       |
| BrSK2(h)             | 51        | Lck(h) activated | 89        | MKK4(m)                    | 101       | cKit(h)               | 113       |
| TAO1(h)              | 52        | MKK6(h)          | 89        | MLCK(h)                    | 101       | ErbB4(h)              | 113       |
| LOK(h)               | 54        | NLK(h)           | 90        | Syk(h)                     | 101       | GSK3α(h)              | 113       |
| Mer(h)               | 54        | Pyk2(h)          | 90        | ZIPK(h)                    | 101       | Itk(h)                | 113       |
| Fes(h)               | 56        | SAPK4(h)         | 90        | MINK(h)                    | 102       | JNK1α1(h)             | 113       |
| PKCη(h)              | 56        | IRAK1(h)         | 91        | NEK2(h)                    | 102       | MuSK(h)               | 113       |
| Fgr(h)               | 57        | PASK(h)          | 91        | Pim-1(h)                   | 102       | Pim-3(h)              | 113       |
| KDR(h)               | 57        | DCAMKL2(h)       | 92        | PKCι(h)                    | 102       | Ros(h)                | 114       |
| PTK5(h)              | 57        | EphA5(h)         | 92        | RIPK2(h)                   | 102       | SRPK2(h)              | 114       |
| GRK7(h)              | 58        | PKCα(h)          | 92        | Tsk(h)                     | 102       | mTOR(h)               | 115       |
| ROCK-1(h)            | 58        | SGK3(h)          | 92        | CK1γ1(h)                   | 103       | SGK(h)                | 115       |
| Src(1-530)(h)        | 58        | Bmx(h)           | 93        | c-RAF(h)                   | 103       | CHK1(h)               | 116       |
| PKCβIII(h)           | 59        | CDK3/cyclinE(h)  | 93        | PAK5(h)                    | 103       | CK2(h)                | 116       |
| CDK7/cyclinH/MAT1(h) | 60        | EphA7(h)         | 93        | PI3 Kinase (p110δ/p85α)(h) | 103       | IR(h)                 | 116       |
| SIK(h)               | 60        | EphB2(h)         | 93        | Tie2(h)                    | 103       | CaMKIδ(h)             | 117       |
| TrkA(h)              | 60        | EphB4(h)         | 93        | CK1δ(h)                    | 104       | JNK2α2(h)             | 118       |
| GCK(h)               | 61        | GSK3β(h)         | 93        | eEF-2K(h)                  | 104       | TSSK2(h)              | 119       |
| LIMK1(h)             | 62        | LKB1(h)          | 93        | EphB3(h)                   | 104       | Pim-2(h)              | 120       |
| AMPKα1(h)            | 63        | PKCζ(h)          | 93        | IGF-1R(h), activated       | 104       | MKK7β(h)              | 122       |
| Hck(h)               | 64        | TAK1(h)          | 93        | IRAK4(h)                   | 104       | DDR2(h)               | 123       |
| Ret(h)               | 64        | ULK3(h)          | 93        | MRCCKβ(h)                  | 104       | JAK2(h)               | 136       |
| PKCι(h)              | 66        | CDK2/cyclinA(h)  | 94        | PAR-1Bα(h)                 | 104       | Fms(h)                | 149       |
| FGFR3(h)             | 67        | DRAK1(h)         | 94        | SAPK3(h)                   | 104       | TSSK1(h)              | 195       |
| EphB1(h)             | 68        | Met(h)           | 94        | EphA3(h)                   | 105       |                       |           |
| Haspin(h)            | 69        | PKD2(h)          | 94        | MRCKα(h)                   | 105       |                       |           |
| PKCε(h)              | 69        | Plk1(h)          | 94        | NEK3(h)                    | 105       |                       |           |

Table S8.

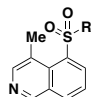

| R | IC <sub>50</sub> (μM)<br>@ 25 μM ATP | IC <sub>50</sub> (μM)<br>@ 100 μM ATP | R | IC <sub>50</sub> (μM)<br>@ 25 μM ATP | IC <sub>50</sub> (μM)<br>@ 100 μM ATP | R | IC <sub>50</sub> (μM)<br>@ 25 μM ATP | IC <sub>50</sub> (μM)<br>@ 100 μM ATP |
|---|--------------------------------------|---------------------------------------|---|--------------------------------------|---------------------------------------|---|--------------------------------------|---------------------------------------|
|   | <b>0.063</b>                         | <b>0.17</b>                           |   | <b>1.8</b>                           | <b>3.7</b>                            |   | <b>2.0</b>                           | <b>4.6</b>                            |
|   | <b>32</b>                            | <b>56</b>                             |   | <b>0.037</b>                         | <b>0.090</b>                          |   | <b>0.067</b>                         | <b>0.15</b>                           |
|   | <b>1.2</b>                           | <b>3.2</b>                            |   | <b>2.8</b>                           | <b>9.2</b>                            |   | <b>0.011</b>                         | <b>0.025</b>                          |
|   | <b>2.7</b>                           | <b>9.2</b>                            |   | <b>0.81</b>                          | <b>3.2</b>                            |   | <b>0.52</b>                          | <b>1.2</b>                            |
|   | <b>5.9</b>                           | <b>10</b>                             |   | <b>0.12</b>                          | <b>0.25</b>                           |   | <b>0.073</b>                         | <b>0.14</b>                           |
|   | <b>0.54</b>                          | <b>1.6</b>                            |   | <b>0.020</b>                         | <b>0.032</b>                          |   | <b>0.061</b>                         | <b>0.13</b>                           |
|   | <b>0.42</b>                          | <b>1.7</b>                            |   | <b>0.42</b>                          | <b>0.87</b>                           |   | <b>0.084</b>                         | <b>0.21</b>                           |
|   | <b>4.2</b>                           | <b>12</b>                             |   | <b>0.24</b>                          | <b>0.53</b>                           |   | <b>0.26</b>                          | <b>1.0</b>                            |
|   | <b>0.065</b>                         | <b>0.14</b>                           |   | <b>0.037</b>                         | <b>0.11</b>                           |   |                                      |                                       |
|   | <b>0.78</b>                          | <b>2.2</b>                            |   |                                      |                                       |   |                                      |                                       |

**Table S9.** Comparison of the biochemical  $K_i$  with  $K_d$  in the Ambit binding assay

| Compound                                                                            | Biochemical $K_i$ (nM) | Ambit $K_d$ (nM) | Compound                                                                           | Biochemical $K_i$ (nM) | Ambit $K_d$ (nM) |
|-------------------------------------------------------------------------------------|------------------------|------------------|------------------------------------------------------------------------------------|------------------------|------------------|
| 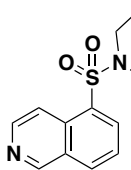   | <b>6800</b>            | <b>4600</b>      |   | <b>25</b>              | <b>14</b>        |
|    | <b>1700</b>            | <b>1300</b>      |   | <b>74</b>              | <b>43</b>        |
|    | <b>89</b>              | <b>130</b>       |   | <b>14</b>              | <b>29</b>        |
|   | <b>35</b>              | <b>120</b>       |  | <b>2.6</b>             | <b>11</b>        |
|  | <b>20</b>              | <b>32</b>        |                                                                                    |                        |                  |
|  | <b>3700</b>            | <b>3200</b>      |                                                                                    |                        |                  |

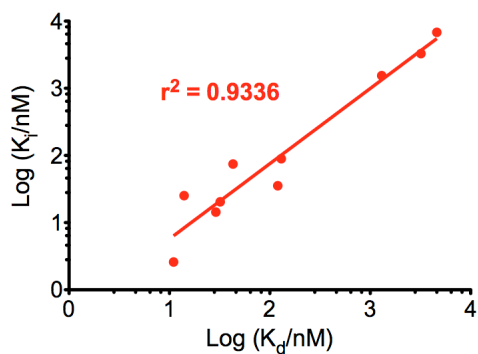



Table S10.

| KINOMEscan Gene Symbol        | Control% |
|-------------------------------|----------|
| RIOK1                         | 2.6      |
| MST4                          | 4        |
| STK33                         | 11       |
| RSK4(Kin.Dom.1-N-terminal)    | 11       |
| AKT1                          | 15       |
| KIT(D816V)                    | 15       |
| ROCK1                         | 16       |
| FLT3(JTD)                     | 19       |
| EPHA1                         | 20       |
| FLT3(D835Y)                   | 20       |
| PRKCE                         | 21       |
| PRKCD                         | 22       |
| ROCK2                         | 23       |
| PRKX                          | 25       |
| ABL1(H396P)-nonphosphorylated | 27       |
| PIP3K1A                       | 32       |
| MST2                          | 35       |
| NEK3                          | 36       |
| GRK7                          | 38       |
| ULK1                          | 38       |
| ABL1(T317I)-phosphorylated    | 40       |
| LZK                           | 40       |
| ABL1-phosphorylated           | 41       |
| S6K1                          | 41       |
| MST3                          | 42       |
| PHKG2                         | 43       |
| RIOK3                         | 43       |
| ABL1(F317L)-phosphorylated    | 44       |
| JAK3(JH1domain-catalytic)     | 46       |
| PLK4                          | 47       |
| FLT3                          | 48       |
| MERTK                         | 48       |
| MET(M1250T)                   | 48       |
| DLK                           | 50       |
| PKAC-alpha                    | 52       |
| BIKE                          | 55       |
| CAMKK2                        | 56       |
| FLT3(N841I)                   | 56       |
| TBK1                          | 56       |
| AURKB                         | 57       |
| RSK2(Kin.Dom.1-N-terminal)    | 57       |
| ABL1(F317L)-nonphosphorylated | 58       |
| EPHA3                         | 58       |
| AURKC                         | 59       |
| HIPK1                         | 59       |
| MAP4K3                        | 59       |
| IRAK3                         | 60       |
| SRC                           | 61       |
| ABL1(H396P)-phosphorylated    | 62       |
| PHKG1                         | 63       |
| AKT3                          | 65       |
| CDK7                          | 65       |
| YSK1                          | 66       |
| ABL1(M331T)-phosphorylated    | 67       |
| ABL1(Q252H)-phosphorylated    | 67       |
| ABL1(Y253F)-phosphorylated    | 67       |
| RSK3(Kin.Dom.2-C-terminal)    | 67       |
| MELK                          | 68       |
| TRPM6                         | 68       |
| RET(M918T)                    | 69       |
| KIT(V559D,T670I)              | 70       |
| PDGFRB                        | 70       |
| RSK4(Kin.Dom.2-C-terminal)    | 70       |
| STK35                         | 70       |
| KIT                           | 71       |
| TRKB                          | 71       |
| ERN1                          | 72       |
| FGR                           | 72       |
| CDK2                          | 73       |
| WEE2                          | 73       |
| AAK1                          | 74       |
| ACVR1B                        | 74       |
| AXL                           | 74       |
| CDKL1                         | 74       |

| KINOMEscan Gene Symbol     | Control% |
|----------------------------|----------|
| DCAMKL2                    | 74       |
| PKN2                       | 74       |
| RSK1(Kin.Dom.2-C-terminal) | 74       |
| TESK1                      | 74       |
| BRSK1                      | 75       |
| EPHA2                      | 75       |
| ABL1(E252K)-phosphorylated | 76       |
| EPHB1                      | 76       |
| FAK                        | 76       |
| PRKCG                      | 76       |
| RAF1                       | 76       |
| CSNK2A1                    | 77       |
| FRK                        | 77       |
| MEK3                       | 77       |
| EGFR(L861Q)                | 78       |
| FGFR1                      | 78       |
| INSR                       | 78       |
| IRAK4                      | 78       |
| TYK2(JH1domain-catalytic)  | 78       |
| CDK11                      | 79       |
| ZAK                        | 79       |
| ABL1-nonphosphorylated     | 80       |
| KIT(D816H)                 | 80       |
| PRKD3                      | 80       |
| SRPK3                      | 80       |
| DCAMKL1                    | 81       |
| MARK4                      | 81       |
| PIP3K1C                    | 81       |
| FES                        | 82       |
| KIT(V559D)                 | 82       |
| MARK2                      | 82       |
| MST1R                      | 82       |
| PAK7                       | 82       |
| CLK1                       | 83       |
| CSF1R                      | 83       |
| PKNB(M.tuberculosis)       | 83       |
| JNK1                       | 84       |
| LYN                        | 84       |
| PDPK1                      | 84       |
| PRKG1                      | 84       |
| EPHA6                      | 85       |
| GRK1                       | 85       |
| PIK3CG                     | 85       |
| PYK2                       | 85       |
| CDK3                       | 86       |
| EGFR(T790M)                | 86       |
| ERK3                       | 86       |
| HIPK4                      | 86       |
| JAK2(JH1domain-catalytic)  | 86       |
| PIP3K2B                    | 86       |
| SLK                        | 86       |
| TAOK1                      | 86       |
| TGFBR1                     | 86       |
| TLE1                       | 86       |
| TNNI3K                     | 86       |
| CSNK1A1                    | 87       |
| HPK1                       | 87       |
| LIMK2                      | 87       |
| MAP3K4                     | 87       |
| RSK1(Kin.Dom.1-N-terminal) | 87       |
| ANKK1                      | 88       |
| EGFR(G719C)                | 88       |
| MAP4K5                     | 88       |
| PRKCH                      | 88       |
| DAPK1                      | 89       |
| KIT(L576P)                 | 89       |
| MAP3K3                     | 89       |
| MAP4K2                     | 89       |
| PIK3CA(E542K)              | 89       |
| PRKG2                      | 89       |
| ACVR2A                     | 90       |
| CAMK1G                     | 90       |
| FGFR2                      | 90       |
| FGFR4                      | 90       |

| KINOMEscan Gene Symbol        | Control% |
|-------------------------------|----------|
| JNK2                          | 90       |
| p38-zamma                     | 90       |
| PKAC-beta                     | 90       |
| SIK2                          | 90       |
| SNARK                         | 90       |
| TIE1                          | 90       |
| ULK2                          | 90       |
| ULK3                          | 90       |
| CAMK2G                        | 91       |
| DYRK1B                        | 91       |
| EPHA8                         | 91       |
| MYLK2                         | 91       |
| BMX                           | 92       |
| CDKL2                         | 92       |
| CDKL3                         | 92       |
| FLT3(D835H)                   | 92       |
| MAP4K4                        | 92       |
| MARK1                         | 92       |
| MKK7                          | 92       |
| MLK2                          | 92       |
| MRCKA                         | 92       |
| PIK3CA(I800L)                 | 92       |
| PRP4                          | 92       |
| STK36                         | 92       |
| TRKA                          | 92       |
| AKT2                          | 93       |
| EGFR(E746-A750del)            | 93       |
| EGFR(L747-S752del,P753S)      | 93       |
| PLK2                          | 93       |
| ABL1(F317I)-nonphosphorylated | 94       |
| ABL1(Q252H)-nonphosphorylated | 94       |
| ADCK4                         | 94       |
| EPHA5                         | 94       |
| EPHA7                         | 94       |
| GRK4                          | 94       |
| IRAK1                         | 94       |
| MARK3                         | 94       |
| p38-beta                      | 94       |
| RIOK2                         | 94       |
| LRRK2(G2019S)                 | 95       |
| PFAIRE2                       | 95       |
| PIK3CB                        | 95       |
| SRMS                          | 95       |
| EGFR(L747-T751del,Sins)       | 96       |
| EPHB2                         | 96       |
| ERBB4                         | 96       |
| GAK                           | 96       |
| PCTK1                         | 96       |
| RIPK4                         | 96       |
| TAK1                          | 96       |
| OSR1                          | 97       |
| RIPK1                         | 97       |
| BMPR2                         | 98       |
| EGFR(L858R)                   | 98       |
| LATS1                         | 98       |
| MYO3B                         | 98       |
| YANK3                         | 98       |
| CDK8                          | 99       |
| DMPK2                         | 99       |
| EPHB3                         | 99       |
| EPHB6                         | 99       |
| LATS2                         | 99       |
| ROS1                          | 99       |
| ABL1(F317I)-phosphorylated    | 100      |
| ABL1(T315I)-nonphosphorylated | 100      |
| ABL2                          | 100      |
| ACVR1                         | 100      |
| ACVR2B                        | 100      |
| ACVRL1                        | 100      |
| ADCK3                         | 100      |
| ALK                           | 100      |
| AMPK-alpha1                   | 100      |
| AMPK-alpha2                   | 100      |
| ARR3                          | 100      |

Table S10 (continued).

| KINOMEscan Gene Symbol   | Control% |
|--------------------------|----------|
| ASK1                     | 100      |
| ASK2                     | 100      |
| AURKA                    | 100      |
| BLK                      | 100      |
| BMPR1A                   | 100      |
| BMPR1B                   | 100      |
| BRAF                     | 100      |
| BRAF(V600E)              | 100      |
| BRK                      | 100      |
| BRSK2                    | 100      |
| BTK                      | 100      |
| CAMK1                    | 100      |
| CAMK1D                   | 100      |
| CAMK2A                   | 100      |
| CAMK2B                   | 100      |
| CAMK2D                   | 100      |
| CAMK4                    | 100      |
| CAMKK1                   | 100      |
| CASK                     | 100      |
| CDC3L1                   | 100      |
| CDC3L2                   | 100      |
| CDC3L5                   | 100      |
| CDK4-cyclinD1            | 100      |
| CDK4-cyclinD3            | 100      |
| CDK5                     | 100      |
| CDK9                     | 100      |
| CDKL5                    | 100      |
| CHEK1                    | 100      |
| CHEK2                    | 100      |
| CIT                      | 100      |
| CLK2                     | 100      |
| CLK3                     | 100      |
| CLK4                     | 100      |
| CSK                      | 100      |
| CSNK1A1L                 | 100      |
| CSNK1D                   | 100      |
| CSNK1E                   | 100      |
| CSNK1G1                  | 100      |
| CSNK1G2                  | 100      |
| CSNK1G3                  | 100      |
| CSNK2A2                  | 100      |
| CTK                      | 100      |
| DAPK2                    | 100      |
| DAPK3                    | 100      |
| DCAMKL3                  | 100      |
| DDR1                     | 100      |
| DDR2                     | 100      |
| DMPK                     | 100      |
| DRAK1                    | 100      |
| DRAK2                    | 100      |
| DYRK1A                   | 100      |
| DYRK2                    | 100      |
| EGFR                     | 100      |
| EGFR(G719S)              | 100      |
| EGFR(L747-E749del_A750P) | 100      |
| EGFR(L858R_T790M)        | 100      |
| EGFR(S732-T739del)       | 100      |
| EIP2AK1                  | 100      |
| EPHA4                    | 100      |
| EPHB4                    | 100      |
| ERBB2                    | 100      |
| ERBB3                    | 100      |
| ERK1                     | 100      |
| ERK2                     | 100      |
| ERK4                     | 100      |
| ERK5                     | 100      |
| ERK8                     | 100      |
| FER                      | 100      |
| FGFR3                    | 100      |
| FGFR3(G697C)             | 100      |
| FLT1                     | 100      |
| FLT3(K663Q)              | 100      |
| FLT3(R834Q)              | 100      |
| FLT4                     | 100      |

| KINOMEscan Gene Symbol        | Control% |
|-------------------------------|----------|
| FYN                           | 100      |
| GCN2(Kin Dom. 2, S808G)       | 100      |
| GSK3A                         | 100      |
| GSK3B                         | 100      |
| HCK                           | 100      |
| HIPK2                         | 100      |
| HIPK3                         | 100      |
| HUNK                          | 100      |
| ICK                           | 100      |
| IGF1R                         | 100      |
| IKK-alpha                     | 100      |
| IKK-beta                      | 100      |
| IKK-epsilon                   | 100      |
| INSR                          | 100      |
| ITK                           | 100      |
| JAK1(JH1 domain-catalytic)    | 100      |
| JAK1(JH2 domain-pseudokinase) | 100      |
| JNK3                          | 100      |
| KIT(A829P)                    | 100      |
| KIT(V559D_V654A)              | 100      |
| LCK                           | 100      |
| LIMK1                         | 100      |
| LKB1                          | 100      |
| LOK                           | 100      |
| LRKK2                         | 100      |
| LTK                           | 100      |
| MAK                           | 100      |
| MAP3K1                        | 100      |
| MAP3K15                       | 100      |
| MAP3K2                        | 100      |
| MAPKAPK2                      | 100      |
| MAPKAPK5                      | 100      |
| MAST1                         | 100      |
| MEK1                          | 100      |
| MEK2                          | 100      |
| MEK4                          | 100      |
| MEK5                          | 100      |
| MEK6                          | 100      |
| MET                           | 100      |
| MET(Y1235D)                   | 100      |
| MDNK                          | 100      |
| MKNK1                         | 100      |
| MKNK2                         | 100      |
| MLCK                          | 100      |
| MLK1                          | 100      |
| MLK3                          | 100      |
| MRCKB                         | 100      |
| MST1                          | 100      |
| MTOR                          | 100      |
| MUSK                          | 100      |
| MYLK                          | 100      |
| MYLK4                         | 100      |
| MYO3A                         | 100      |
| NDR1                          | 100      |
| NDR2                          | 100      |
| NEK1                          | 100      |
| NEK11                         | 100      |
| NEK2                          | 100      |
| NEK3                          | 100      |
| NEK4                          | 100      |
| NEK6                          | 100      |
| NEK7                          | 100      |
| NEK9                          | 100      |
| NIM1                          | 100      |
| NLK                           | 100      |
| p38-alpha                     | 100      |
| p38-delta                     | 100      |
| PAK1                          | 100      |
| PAK2                          | 100      |
| PAK3                          | 100      |
| PAK4                          | 100      |
| PAK6                          | 100      |
| PCK2                          | 100      |
| PCK3                          | 100      |

| KINOMEscan Gene Symbol         | Control% |
|--------------------------------|----------|
| PDGFRA                         | 100      |
| PFCDPK1(Pfalciparum)           | 100      |
| PFPK3(Pfalciparum)             | 100      |
| PFTK1                          | 100      |
| PIK3C2B                        | 100      |
| PIK3C2G                        | 100      |
| PIK3CA                         | 100      |
| PIK3CA(C420R)                  | 100      |
| PIK3CA(E545A)                  | 100      |
| PIK3CA(E545K)                  | 100      |
| PIK3CA(H1047L)                 | 100      |
| PIK3CA(H1047Y)                 | 100      |
| PIK3CA(M1043I)                 | 100      |
| PIK3CA(Q5+6K)                  | 100      |
| PIK3CD                         | 100      |
| PIK4CB                         | 100      |
| PIM1                           | 100      |
| PIM2                           | 100      |
| PIM3                           | 100      |
| PIP5K2C                        | 100      |
| PKMYT1                         | 100      |
| PKN1                           | 100      |
| PLK1                           | 100      |
| PLK3                           | 100      |
| PRKCI                          | 100      |
| PRKD1                          | 100      |
| PRKD2                          | 100      |
| PRKR                           | 100      |
| QSK                            | 100      |
| RET                            | 100      |
| RET(V804L)                     | 100      |
| RET(V804M)                     | 100      |
| RIPK2                          | 100      |
| RIPK5                          | 100      |
| RPS6KA4(Kin Dom. 1-N-terminal) | 100      |
| RPS6KA4(Kin Dom. 2-C-terminal) | 100      |
| RPS6KA5(Kin Dom. 1-N-terminal) | 100      |
| RPS6KA5(Kin Dom. 2-C-terminal) | 100      |
| RSK3(Kin Dom. 1-N-terminal)    | 100      |
| SBK1                           | 100      |
| SaK110                         | 100      |
| SGK3                           | 100      |
| SIK                            | 100      |
| SNRK                           | 100      |
| SRPK1                          | 100      |
| SRPK2                          | 100      |
| STK16                          | 100      |
| STK39                          | 100      |
| SYK                            | 100      |
| TAOK2                          | 100      |
| TAOK3                          | 100      |
| TEC                            | 100      |
| TGFBR2                         | 100      |
| TIE2                           | 100      |
| TLK2                           | 100      |
| TNK                            | 100      |
| TNK1                           | 100      |
| TNK2                           | 100      |
| TRKC                           | 100      |
| TSSK1B                         | 100      |
| TTK                            | 100      |
| TXX                            | 100      |
| TYK2(JH2 domain-pseudokinase)  | 100      |
| TYRO3                          | 100      |
| VEGFR2                         | 100      |
| VRK2                           | 100      |
| WEE1                           | 100      |
| YANK1                          | 100      |
| YANK2                          | 100      |
| YES                            | 100      |
| YSK4                           | 100      |
| ZAP70                          | 100      |

Table S11.

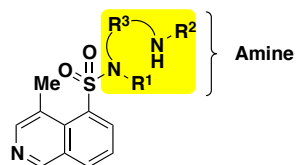

**STK33 IC<sub>50</sub> (μM) @ 25 μM ATP (K<sub>m</sub>)**  
**AurB IC<sub>50</sub> (μM) @ 10 μM ATP (K<sub>m</sub>)**

| Amine       | STK33        | AurB        | Amine       | STK33        | AurB         |
|-------------|--------------|-------------|-------------|--------------|--------------|
| <br>BRD3773 | <b>0.19</b>  | <b>0.31</b> | <br>BRD7569 | <b>0.067</b> | <b>0.19</b>  |
| <br>BRD3752 | <b>0.047</b> | <b>0.22</b> | <br>BRD3695 | <b>0.020</b> | <b>0.24</b>  |
| <br>BRD3695 | <b>0.063</b> | <b>0.17</b> | <br>BRD8899 | <b>0.011</b> | <b>0.17</b>  |
| <br>BRD1045 | <b>0.12</b>  | <b>0.55</b> | <br>BRD5749 | <b>0.52</b>  | <b>1.0</b>   |
| <br>BRD4980 | <b>0.037</b> | <b>0.40</b> | <br>BRD4717 | <b>0.073</b> | <b>0.074</b> |
| <br>BRD2880 | <b>0.24</b>  | <b>0.68</b> | <br>BRD1469 | <b>0.061</b> | <b>0.70</b>  |
| <br>BRD3192 | <b>0.037</b> | <b>0.11</b> |             |              |              |

**Table S12. Cell lines used for the cell-based screens.**

| <b>Name</b> | <b>Origin</b>     | <b>KRAS status<sup>i</sup></b> |
|-------------|-------------------|--------------------------------|
| NOMO-1      | AML               | G13D                           |
| SKM-1       | AML               | K117N                          |
| NB4         | AML               | A18D                           |
| THP-1       | AML               | WT                             |
| U937        | AML               | WT                             |
| OCI-AML3    | AML               | WT                             |
| MOLM-16     | AML               | WT                             |
| PL-21       | AML               | WT                             |
| EOL-1       | AML               | WT                             |
| GDM-1       | AML               | WT                             |
| KOPN-8      | ALL               | G13D                           |
| JURKAT      | ALL               | WT                             |
| Karpas-620  | Multiple myeloma  | G13D                           |
| RPMI-8226   | Multiple myeloma  | G12A                           |
| EJM         | Multiple myeloma  | WT                             |
| MM.1S       | Multiple myeloma  | WT                             |
| DLD-1       | Colon cancer      | G13D                           |
| HCT-15      | Colon cancer      | G13D                           |
| COLO205     | Colon cancer      | WT                             |
| HeyA8       | Ovarian cancer    | G13D                           |
| OVCAR-3     | Ovarian cancer    | WT                             |
| CaOV3       | Ovarian cancer    | WT                             |
| OVCAR-8     | Ovarian cancer    | WT                             |
| KYSE-450    | Esophageal cancer | WT                             |
| MDA-MB-231  | Breast cancer     | G13D                           |

|       |       |      |
|-------|-------|------|
| A549  | NSCLC | G12S |
| H2009 | NSCLC | G12A |
| H1792 | NSCLC | G12C |
| H23   | NSCLC | G12C |
| H1975 | NSCLC | WT   |
| H1568 | NSCLC | WT   |
| H1437 | NSCLC | WT   |
| H522  | NSCLC | WT   |

<sup>1</sup> According to the Catalogues of Somatic Mutations in Cancer (COSMIC).

**Table S13. Biochemical IC<sub>50</sub> values for inhibition of STK33, synthesis yield and QC data**

| Structure | Compound | IC <sub>50</sub> (μM) @ 100 μM ATP | IC <sub>50</sub> (μM) @ 25 μM ATP | yield (%) | Mass ([M+H]) | observed Mass | Rt (min) (LC MS) | Rt (min) (prepHPLC) |
|-----------|----------|------------------------------------|-----------------------------------|-----------|--------------|---------------|------------------|---------------------|
|           | BRD7657  | 29                                 | 14                                |           | 252.08       | 252.16        | 0.41             |                     |
|           | BRD2343  | 43                                 | 20                                |           |              |               |                  |                     |
|           | BRD4375  | 67                                 | 34                                |           |              |               |                  |                     |
|           | BRD6846  | 84                                 | 39                                |           |              |               |                  |                     |
|           | BRD7868  | 31                                 | 14                                |           |              |               |                  |                     |
|           | BRD7446  | 4.3                                | 2                                 |           |              |               |                  |                     |
|           | BRD7647  | 6.6                                | 2.2                               |           |              |               |                  |                     |
|           | BRD7136  | >186                               | >186                              |           |              |               |                  |                     |
|           | BRD6825  | 11                                 | 5.3                               |           |              |               |                  |                     |
|           | BRD5288  | >186                               | >186                              | 99        | 291.12       | 291.08        |                  |                     |

| Structure                                                                           | Compound | IC <sub>50</sub> (μM) @<br>100 μM ATP | IC <sub>50</sub> (μM) @<br>25 μM ATP | yield<br>(%) | Mass ([M+H]) | observed<br>Mass | Rt (min) (LC<br>MS) | Rt (min)<br>(prepHPLC) |
|-------------------------------------------------------------------------------------|----------|---------------------------------------|--------------------------------------|--------------|--------------|------------------|---------------------|------------------------|
| 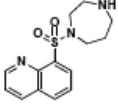   | BRD1651  | >186                                  | >186                                 | 99           | 292.16       | 292.23           | 0.72                |                        |
|    | BRD4469  | >186                                  | >186                                 | 21           | 306.13       | 306.23           | 0.88                | 3.72                   |
|    | BRD0811  | >186                                  | >186                                 | 55           | 256.15       | 256.25           | 0.3                 | 2.27                   |
|    | BRD2998  | >186                                  | >186                                 | 59           | 251.09       | 251.11           |                     | 2.49                   |
|    | BRD4220  | >186                                  | 100                                  | 57           | 253.07       | 253.16           | 0.79                | 1.5                    |
|   | BRD7390  | >186                                  | >186                                 | 67           | 267.08       | 267.16           | 0.9                 | 1.43                   |
|  | BRD6818  | >186                                  | >186                                 | 45           | 462.03       | 462.06           | 1.29                | 3.55                   |
|  | BRD0188  | >186                                  | >186                                 | 53           | 291.12       | 291.26           | 1.36                | 2.84                   |
|  | BRD2751  | 64.00                                 | 29.00                                | 99           | 279.09       | 278.15           | 0.94                |                        |
|  | BRD7527  | >186                                  | >186                                 | 31           | 277.1        | 277.18           | 1.24                | 3.72                   |
|  | BRD9836  | >186                                  | >186                                 | 38           | 279.08       | 279.16           | 0.99                | 2.87                   |

| Structure                                                                           | Compound | IC <sub>50</sub> (μM) @<br>100 μM ATP | IC <sub>50</sub> (μM) @<br>25 μM ATP | yield<br>(%) | Mass ([M+H]) | observed<br>Mass | Rt (min) (LC<br>MS) | Rt (min)<br>(prepHPLC) |
|-------------------------------------------------------------------------------------|----------|---------------------------------------|--------------------------------------|--------------|--------------|------------------|---------------------|------------------------|
| 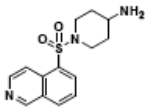   | BRD3518  | <b>60</b>                             | <b>26</b>                            | 54           | 282.11       | 282.18           | 0.83                | 4.24                   |
|    | BRD9802  | <b>174</b>                            | <b>36</b>                            | 48           | 280.11       | 280.27           | 0.79                | 2.54                   |
|    | BRD8531  | <b>98</b>                             | <b>46</b>                            | 74           | 286.1        | 286.12           |                     | 1.03                   |
|    | BRD1688  | <b>&gt;714</b>                        | <b>259</b>                           | 25           | 280.11       | 280.15           | 0.79                | 1.8                    |
|    | BRD0322  | <b>30</b>                             | <b>23</b>                            | 12           | 306.13       | 306.25           | 0.63                | 2.05                   |
|    | BRD5039  | <b>48</b>                             | <b>42</b>                            | 10           | 320.15       | 320.2            | 0.73                | 2.02                   |
|   | BRD5076  | <b>177</b>                            | <b>40</b>                            | 19           | 382.16       | 382.12           | 1.43                | 3.5                    |
|  | BRD2660  | <b>165</b>                            | <b>98</b>                            | 10           | 483.12       | 483.2            | 1.21                |                        |
|  | BRD0272  | <b>&gt;186</b>                        | <b>&gt;186</b>                       | 47           | 392.17       |                  |                     |                        |
|  | BRD8033  | <b>&gt;186</b>                        | <b>&gt;186</b>                       | 42           | 334.12       | 334.3            | 0.91                | 1.67                   |



| Structure | Compound | IC <sub>50</sub> (μM) @<br>100 μM ATP | IC <sub>50</sub> (μM) @<br>25 μM ATP | yield<br>(%) | Mass ([M+H]) | observed<br>Mass | Rt (min) (LC<br>MS) | Rt (min)<br>(prepHPLC) |
|-----------|----------|---------------------------------------|--------------------------------------|--------------|--------------|------------------|---------------------|------------------------|
|           | BRD5624  | >186                                  | >186                                 | 50           | 349.14       | 349.17           | 0.84                | 3.33                   |
|           | BRD4719  | 70                                    | 24                                   | 53           | 306.13       | 306.26           | 0.89                | 3.28                   |
|           | BRD3954  | 127                                   | 64                                   | 25           | 332.15       | 332.15           | 0.83                | 4.27                   |
|           | BRD2533  | >714                                  | 107                                  | 42           | 332.15       | 332.2            | 0.95                | 3.3                    |
|           | BRD1104  | 219                                   | 123                                  | 77           | 340.11       | 340.26           | 0.86                | 1.17                   |
|           | BRD0114  | >186                                  | >186                                 | 4            | 340.11       | 340.21           | 1.23                | 3.68                   |
|           | BRD3773  | 0.56                                  | 0.19                                 | 78           | 306.13       | 306.19           | 0.8                 | 4.08                   |
|           | BRD9852  | 51                                    | 30                                   | 55           | 306.13       | 306.21           | 0.87                | 2.51                   |
|           | BRD9726  | 26                                    | 12                                   | 2            | 306.13       | 306.25           | 0.86                | 2.9                    |
|           | BRD8880  | 49                                    | 24                                   | 51           | 372.02       | 372.13           | 1.5                 | 1.5                    |
|           | BRD5549  | 3.2                                   | 1.6                                  | 25           | 266.1        | 266.26           | 0.86                | 1.55                   |

| Structure                                                                           | Compound | IC <sub>50</sub> (μM) @ 100 μM ATP | IC <sub>50</sub> (μM) @ 25 μM ATP | yield (%) | Mass ([M+H]) | observed Mass | Rt (min) (LC MS) | Rt (min) (prepHPLC) |
|-------------------------------------------------------------------------------------|----------|------------------------------------|-----------------------------------|-----------|--------------|---------------|------------------|---------------------|
| 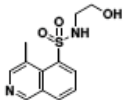   | BRD3610  | <b>25</b>                          | <b>11</b>                         | 40        | 267.08       | 267.21        | 0.86             | 1.6                 |
|    | BRD4153  | > <b>186</b>                       | > <b>186</b>                      | 39        | 352.14       |               |                  |                     |
|    | BRD9391  | > <b>186</b>                       | <b>52</b>                         | 95        | 366.15       | 366.4         | 1.13             |                     |
|    | BRD6995  | <b>4.7</b>                         | <b>1.8</b>                        | 21        | 280.11       | 280.2         | 0.7              | 1.75                |
|    | BRD9091  | > <b>186</b>                       | > <b>186</b>                      | 62        | 366.15       |               |                  |                     |
|    | BRD7177  | <b>89</b>                          | <b>35</b>                         | 48        | 380.17       | 380.5         | 1.25             |                     |
|   | BRD4958  | <b>19</b>                          | <b>7.4</b>                        | 33        | 264.08       | 264.19        | 0.7              | 0.69                |
|  | BRD3966  | <b>0.57</b>                        | <b>0.29</b>                       | 45        | 278.1        | 278.2         | 0.81             | 1.88                |
|  | BRD9325  | <b>1.2</b>                         | <b>0.65</b>                       | 47        | 292.11       | 292.27        | 0.87             | 3.15                |
|  | BRD5991  | <b>42</b>                          | <b>19</b>                         | 55        | 264.08       | 264.2         | 0.84             | 3.38                |
|  | BRD5337  | <b>1.3</b>                         | <b>0.84</b>                       | 72        | 278.1        | 278.23        | 0.84             | 2.93                |

| Structure                                                                           | Compound | IC <sub>50</sub> (μM) @<br>100 μM ATP | IC <sub>50</sub> (μM) @<br>25 μM ATP | yield<br>(%) | Mass ([M+H]) | observed<br>Mass | Rt (min) (LC<br>MS) | Rt (min)<br>(prepHPLC) |
|-------------------------------------------------------------------------------------|----------|---------------------------------------|--------------------------------------|--------------|--------------|------------------|---------------------|------------------------|
| 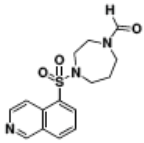   | BRD7364  | >186                                  | 71.43                                | 70           | 320.11       | 320.2            | 0.9                 | 1.52                   |
|    | BRD9027  | 4.1                                   | 1.7                                  | 85           | 334.12       | 334.47           | 1.05                | 2.57                   |
|    | BRD5419  | 2.1                                   | 1.2                                  | 78           | 320.15       | 320.29           | 0.84                | 4.02                   |
|    | BRD1742  | 5.3                                   | 2.7                                  | 59           | 318.13       | 318.25           | 0.88                | 3.48                   |
|   | BRD3590  | 24                                    | 9.3                                  | 67           | 278.1        | 278.17           | 0.8                 | 2.67                   |
|  | BRD3752  | 0.13                                  | 0.047                                | 75           | 292.11       | 292.21           | 0.8                 | 3.83                   |
|  | BRD3490  | 41                                    | 16                                   | 60           | 278.1        | 278.2            | 0.79                | 3.32                   |
|  | BRD0828  | 13                                    | 3.7                                  | 75           | 292.11       | 292.21           | 0.84                | 3.67                   |
|  | BRD3501  | 16                                    | 7.1                                  | 91           | 278.1        | 278.24           | 0.83                | 1.92                   |
|  | BRD3695  | 0.17                                  | 0.063                                | 60           | 292.11       | 292.24           | 0.73                | 2.47                   |

| Structure                                                                           | Compound | IC <sub>50</sub> (μM) @<br>100 μM ATP | IC <sub>50</sub> (μM) @<br>25 μM ATP | yield<br>(%) | Mass ([M+H]) | observed<br>Mass | Rt (min) (LC<br>MS) | Rt (min)<br>(prepHPLC) |
|-------------------------------------------------------------------------------------|----------|---------------------------------------|--------------------------------------|--------------|--------------|------------------|---------------------|------------------------|
| 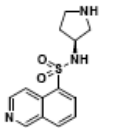   | BRD8943  | <b>39</b>                             | <b>10</b>                            | 42           | 278.1        | 278.24           | 0.78                | 2.44                   |
|    | BRD9573  | <b>10</b>                             | <b>4.8</b>                           | 61           | 292.11       | 292.17           | 0.73                | 2.25                   |
|    | BRD7481  | >714                                  | <b>397.00</b>                        | 64           | 306.13       | 306.19           | 0.77                | 4.23                   |
|    | BRD7425  | >714                                  | >714                                 | 64           | 306.13       | 306.19           | 0.78                | 4.24                   |
|    | BRD2246  | >714                                  | <b>201.00</b>                        | 53           | 292.11       | 292.23           | 0.82                | 2.07                   |
|   | BRD7471  | <b>11</b>                             | <b>4.2</b>                           | 60           | 306.13       | 306.22           | 0.85                | 2.84                   |
|  | BRD9575  | <b>1.9</b>                            | <b>0.79</b>                          | 87           | 292.11       | 292.21           | 0.83                | 4.24                   |
|  | BRD2297  | <b>31</b>                             | <b>16</b>                            | 66           | 290.1        | 290.25           | 0.77                | 3.99                   |
|  | BRD4942  | <b>4.2</b>                            | <b>1.4</b>                           | 69           | 304.11       | 304.22           | 0.82                | 4.2                    |
|  | BRD0841  | <b>16</b>                             | <b>6.1</b>                           | 63           | 292.11       | 292.21           | 0.75                | 4.24                   |
|  | BRD3376  | <b>2.6</b>                            | <b>1.6</b>                           | 92           | 306.13       | 306.21           | 0.84                | 4.27                   |

| Structure | Compound | IC <sub>50</sub> (μM) @<br>100 μM ATP | IC <sub>50</sub> (μM) @<br>25 μM ATP | yield<br>(%) | Mass ([M+H]) | observed<br>Mass | Rt (min) (LC<br>MS) | Rt (min)<br>(prepHPLC) |
|-----------|----------|---------------------------------------|--------------------------------------|--------------|--------------|------------------|---------------------|------------------------|
|           | BRD1199  | >186                                  | 62                                   | 66           | 282.11       | 282.21           | 0.81                | 3.4                    |
|           | BRD3436  | 2.8                                   | 1.2                                  | 77           | 306.13       | 306.22           | 0.88                | 2.67                   |
|           | BRD3033  | 31                                    | 13                                   | 49           | 282.11       | 282.28           | 0.75                | 2.88                   |
|           | BRD2668  | 5.6                                   | 2.6                                  | 31           | 306.13       | 306.28           | 0.8                 | 3.95                   |
|           | BRD0561  | 78                                    | 36                                   | 39           | 282.11       | 282.24           | 0.77                | 2.78                   |
|           | BRD4209  | 1.5                                   | 0.99                                 | 38           | 306.13       | 306.21           | 0.8                 | 3.95                   |
|           | BRD2986  | 2.8                                   | 1.2                                  | 88           | 306.13       | 306.25           | 0.88                | 4.25                   |
|           | BRD5717  | 96                                    | 38                                   | 26           | 282.11       | 282.18           | 0.72                | 3.95                   |
|           | BRD7682  | 16                                    | 7.9                                  | 69           | 306.13       | 306.25           | 0.78                | 4.22                   |
|           | BRD2594  | 47                                    | 16                                   | 67           | 280.1        | 280.21           | 0.84                | 2.09                   |
|           | BRD5731  | 5.1                                   | 2.3                                  | 60           | 304.11       | 304.22           | 0.85                | 2.62                   |

| Structure                                                                           | Compound | IC <sub>50</sub> (μM) @<br>100 μM ATP | IC <sub>50</sub> (μM) @<br>25 μM ATP | yield<br>(%) | Mass ([M+H]) | observed<br>Mass | Rt (min) (LC<br>MS) | Rt (min)<br>(prepHPLC) |
|-------------------------------------------------------------------------------------|----------|---------------------------------------|--------------------------------------|--------------|--------------|------------------|---------------------|------------------------|
| 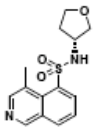   | BRD4357  | <b>56</b>                             | <b>32</b>                            | 92           | 293.1        | 292.97           | 0.97                | 1.92                   |
|    | BRD4618  | <b>3.2</b>                            | <b>1.2</b>                           | 21           | 306.13       | 306.36           | 0.8                 | 2.85                   |
|    | BRD4889  | <b>9.2</b>                            | <b>2.7</b>                           | 5            | 306.13       | 306.3            | 0.74                | 3.87                   |
|    | BRD0227  | <b>1.6</b>                            | <b>0.54</b>                          | 40           | 308.11       | 308.2            | 0.77                | 1.48                   |
|   | BRD6696  | <b>1.7</b>                            | <b>0.42</b>                          | 54           | 307.13       | 307.26           | 0.9(acid)           | 0.75                   |
|  | BRD1230  | <b>12</b>                             | <b>4.2</b>                           | 23           | 336.14       | 336.23           | 0.91(acid)          | 3.25                   |
|  | BRD0035  | <b>2.2</b>                            | <b>0.78</b>                          | 2            | 336.1        | 336.21           | 0.64                | 0.66                   |
|  | BRD4980  | <b>0.09</b>                           | <b>0.037</b>                         | 44           | 321.12       | 322.24           | 0.79                | 1.66                   |

| Structure                                                                           | Compound | IC <sub>50</sub> (μM) @<br>100 μM ATP | IC <sub>50</sub> (μM) @<br>25 μM ATP | yield<br>(%) | Mass ([M+H]) | observed<br>Mass | Rt (min) (LC<br>MS) | Rt (min)<br>(prepHPLC) |
|-------------------------------------------------------------------------------------|----------|---------------------------------------|--------------------------------------|--------------|--------------|------------------|---------------------|------------------------|
| 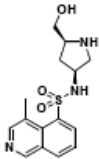   | BRD6875  | <b>9.2</b>                            | <b>2.8</b>                           | 77           | 322.12       | 322.21           | 0.63                | 1.98                   |
|    | BRD8313  | <b>3.2</b>                            | <b>0.81</b>                          | 16           | 322.12       | 322.16           | 0.67                | 3.97                   |
|    | BRD1045  | <b>0.25</b>                           | <b>0.12</b>                          | 45           | 321.12       | 322.21           | 0.7                 | 1.83                   |
|    | BRD7777  | <b>4.6</b>                            | <b>2.0</b>                           | 3            | 350.13       | 350.29           | 0.72                | 1.16                   |
|  | BRD0119  | > <b>186</b>                          | > <b>186</b>                         | 40           | 440.17       | 439.95           | 1.52                | 3.87                   |
|  | BRD5281  | > <b>186</b>                          | > <b>186</b>                         | 43           | 426.15       | 426.23           | 1.34                | 2.87                   |
|  | BRD0649  | > <b>186</b>                          | > <b>186</b>                         | 65           | 378.15       | 378.26           | 1.31                | 3.97                   |
|  | BRD9435  | > <b>186</b>                          | > <b>186</b>                         | 35           | 391.17       | 391.23           | 1.61                | 2.87                   |

| Structure                                                                           | Compound | IC <sub>50</sub> (μM) @<br>100 μM ATP | IC <sub>50</sub> (μM) @<br>25 μM ATP | yield<br>(%) | Mass ([M+H]) | observed<br>Mass | Rt (min) (LC<br>MS) | Rt (min)<br>(prepHPLC) |
|-------------------------------------------------------------------------------------|----------|---------------------------------------|--------------------------------------|--------------|--------------|------------------|---------------------|------------------------|
| 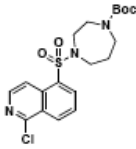   | BRD2109  | >186                                  | >186                                 | 85           | 426.13       | 426.25           | 1.57                | 2.25                   |
|    | BRD0197  | 27.14                                 | 10.71                                |              | 326.13       | 326.14           | 0.9                 |                        |
|    | BRD9508  | >186                                  | >186                                 | 42           | 392.16       | 392.14           | 1.43                | 3.4                    |
|    | BRD1968  | >186                                  | >186                                 | 51           | 291.12       | 291.21           | 1.3                 | 3.98                   |
|    | BRD2155  | >186                                  | >186                                 | 39           | 300.08       | 300.17           | 0.9                 | 2.08                   |
|   | BRD6736  | >186                                  | >186                                 | 12           | 291.04       | 291.14           | 1.11                | 0.92                   |
|  | BRD8071  | >186                                  | >186                                 | 46           | 317.08       | 317.14           | 1.24                | 3.53                   |
|  | BRD4041  | >186                                  | >186                                 | 49           | 335.07       | 335.13           | 1.28                | 3.62                   |
|  | BRD3373  | >186                                  | >186                                 | 70           | 277.1        | 277.17           | 1.2                 | 3.42                   |



| Structure | Compound | IC <sub>50</sub> (μM) @ 100 μM ATP | IC <sub>50</sub> (μM) @ 25 μM ATP | yield (%) | Mass ([M+H]) | observed Mass | Rt (min) (LC MS) | Rt (min) (prepHPLC) |
|-----------|----------|------------------------------------|-----------------------------------|-----------|--------------|---------------|------------------|---------------------|
|           | BRD0572  | >186                               | >186                              | 53        | 283.09       | 283.13        | 1.12             | 2.67                |
|           | BRD8188  | >186                               | >186                              | 58        | 375.12       | 375.14        | 1.47             | 3.96                |
|           | BRD5670  | >186                               | >186                              | 50        | 333.05       | 333.1         | 1.33             | 4                   |
|           | BRD1731  | >186                               | >186                              | 61        | 343.08       | 343.15        | 1.18             | 3.22                |
|           | BRD4533  | >186                               | >186                              | 39        | 300.08       | 300.18        | 0.83             | 1.87                |
|           | BRD9215  | 75.71                              | 46.43                             | 60        | 320.15       | 320.22        | 0.85             | 3.63                |
|           | BRD8584  | >186                               | >186                              | 61        | 317.08       | 317.14        | 1.21             | 3.37                |
|           | BRD9483  | >186                               | >186                              | 42        | 300.08       | 300.17        | 0.83             | 3.43                |
|           | BRD7266  | >186                               | >186                              | 6         | 329.1        | 329.18        | 1.2              | 3.4                 |

| Structure | Compound | IC <sub>50</sub> (μM) @<br>100 μM ATP | IC <sub>50</sub> (μM) @<br>25 μM ATP | yield<br>(%) | Mass ([M+H]) | observed<br>Mass | Rt (min) (LC<br>MS) | Rt (min)<br>(prepHPLC) |
|-----------|----------|---------------------------------------|--------------------------------------|--------------|--------------|------------------|---------------------|------------------------|
|           | BRD0698  | >186                                  | >186                                 | 90           | 313.1        | 313.19           | 1.26                | 3.98                   |
|           | BRD7209  | >186                                  | >186                                 | 74           | 329.1        | 329.15           | 1.23                | 3.82                   |
|           | BRD7538  | >186                                  | >186                                 | 64           | 313.1        | 313.19           | 1.27                | 3.88                   |
|           | BRD7505  | >186                                  | >186                                 | 77           | 313.1        | 313.19           | 1.27                | 3.88                   |
|           | BRD4836  | >186                                  | >186                                 | 30           | 325.1        | 325.19           | 1.4                 | 3.37                   |
|           | BRD9370  | 36                                    | 46                                   | 68           | 449.19       | 449.29           | 1.18                |                        |
|           | BRD0413  | >186                                  | >186                                 | 43           | 442.18       | 442.22           | 1.4                 | 3.43                   |
|           | BRD2850  | >186                                  | >186                                 | 61           | 299.09       | 299.13           | 1.17                | 3.13                   |

| Structure | Compound | IC <sub>50</sub> (μM) @<br>100 μM ATP | IC <sub>50</sub> (μM) @<br>25 μM ATP | yield<br>(%) | Mass ([M+H]) | observed<br>Mass | Rt (min) (LC<br>MS) | Rt (min)<br>(prepHPLC) |
|-----------|----------|---------------------------------------|--------------------------------------|--------------|--------------|------------------|---------------------|------------------------|
|           | BRD0886  | >186                                  | >186                                 | 54           | 400.14       | 400.16           | 1.21                |                        |
|           | BRD4857  | 351                                   | 104                                  | 83           | 292.11       | 292.19           | 0.87                | 0.39                   |
|           | BRD4962  | >714                                  | >714                                 | 81           | 394.14       | 394.15           | 1.45                | 0.63                   |
|           | BRD3419  | >186                                  | >186                                 | 37           | 314.1        | 314.17           | 0.87                | 0.39                   |
|           | BRD3734  | >186                                  | >186                                 | 19           | 392.08       | 392.09           | 1.02                | 2.74                   |
|           | BRD8652  | >186                                  | >186                                 | 32           | 382.12       | 382.15           | 1.21                | 3.28                   |
|           | BRD1343  | >186                                  | >186                                 | 53           | 303.12       | 303.22           | 1.37                | 2.67                   |
|           | BRD9796  | 33                                    | 16                                   | 17           | 346.16       | 346.2            | 0.96                | 3.93                   |
|           | BRD9178  | >186                                  | >186                                 | 17           | 386.12       | 386.35           | 1.24                | 3.08                   |
|           | BRD6382  | >186                                  | >186                                 | 28           | 414.15       | 413.97           | 1.32                | 3.99                   |

| Structure                                                                           | Compound | IC <sub>50</sub> (μM) @<br>100 μM ATP | IC <sub>50</sub> (μM) @<br>25 μM ATP | yield<br>(%) | Mass ([M+H]) | observed<br>Mass | Rt (min) (LC<br>MS) | Rt (min)<br>(prepHPLC) |
|-------------------------------------------------------------------------------------|----------|---------------------------------------|--------------------------------------|--------------|--------------|------------------|---------------------|------------------------|
| 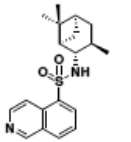   | BRD7394  | >186                                  | >186                                 | 64           | 345.17       | 345.22           | 1.58 (acid)         | 2.09                   |
|    | BRD2520  | >186                                  | >186                                 | 49           | 357.17       | 357.24           | 1.60(acid)          | 2.58                   |
|    | BRD7178  | >186                                  | >186                                 | 51           | 319.15       | 319.24           | 1.42(acid)          | 1.75                   |
|    | BRD2867  | >186                                  | >186                                 | 58           | 319.15       | 319.31           | 1.43(acid)          | 1.77                   |
|   | BRD4468  | >186                                  | >186                                 | 60           | 432.2        | 432.24           | 1.54                | 3.97                   |
|  | BRD3078  | >714                                  | 166                                  | 5            | 483.12       | 483.2            | 0.82                | 3.25                   |
|  | BRD2024  | 12                                    | 6.1                                  | 5            | 511.15       | 511.23           | 1.29                | 4.07                   |
|  | BRD5499  | >186                                  | >186                                 | 4            | 471.12       | 471.3            | 1.27                | 4.04                   |
|  | BRD7388  | >186                                  | >186                                 | 62           | 287.08       | 287.13           | 0.86                | 1.4                    |

| Structure                                                                           | Compound | IC <sub>50</sub> (μM) @<br>100 μM ATP | IC <sub>50</sub> (μM) @<br>25 μM ATP | yield<br>(%) | Mass ([M+H]) | observed<br>Mass | Rt (min) (LC<br>MS) | Rt (min)<br>(prepHPLC) |
|-------------------------------------------------------------------------------------|----------|---------------------------------------|--------------------------------------|--------------|--------------|------------------|---------------------|------------------------|
| 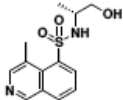   | BRD8939  | <b>33</b>                             | <b>13</b>                            | 61           | 281.1        | 281.25           | 0.92                | 2.1                    |
|    | BRD9592  | <b>&gt;186</b>                        | <b>&gt;186</b>                       | 26           | 378.15       | 378.3            | 1.32                | 2.92                   |
|    | BRD6645  | <b>&gt;357</b>                        | <b>102</b>                           | 52           | 306.13       | 306.16           | 0.67(acid)          | 3.65                   |
|    | BRD9304  | <b>&gt;186</b>                        | <b>&gt;186</b>                       | 88           | 390.15       | 390.57           | 1.29                |                        |
|    | BRD9082  | <b>151</b>                            | <b>56</b>                            | 58           | 312.06       | 312.16           | 0.91                | 1.43                   |
|   | BRD1303  | <b>7.9</b>                            | <b>2.6</b>                           | 62           | 308.11       | 308.21           | 0.75                | 2.22                   |
|  | BRD5165  | <b>39</b>                             | <b>20</b>                            | 7            | 292.11       | 292.28           | 0.8                 | 2.6                    |
|  | BRD7787  | <b>16</b>                             | <b>6.2</b>                           | 69           | 308.11       | 308.24           | 0.77                | 2.19                   |
|  | BRD9509  | <b>296</b>                            | <b>257</b>                           | 38           | 372.02       | 372.19           | 0.91                | 3.82                   |

| Structure | Compound | IC <sub>50</sub> (μM) @<br>100 μM ATP | IC <sub>50</sub> (μM) @<br>25 μM ATP | yield<br>(%) | Mass ([M+H]) | observed<br>Mass | Rt (min) (LC<br>MS) | Rt (min)<br>(prepHPLC) |
|-----------|----------|---------------------------------------|--------------------------------------|--------------|--------------|------------------|---------------------|------------------------|
|           | BRD2334  | <b>29</b>                             | <b>13</b>                            | 73           | 293.1        | 293.22           | 0.97                | 2.3                    |
|           | BRD4275  | <b>7.2</b>                            | <b>3.8</b>                           | 49           | 306.13       | 306.31           | 0.92                | 3.06                   |
|           | BRD9773  | <b>&gt;186</b>                        | <b>&gt;186</b>                       | 75           | 380.17       |                  |                     |                        |
|           | 26       |                                       |                                      | 41           | 408.16       | 408.27           | 1.2                 | 3.92                   |
|           | 27       |                                       |                                      | 45           | 408.16       | 408.27           | 1.11                | 3.48                   |
|           | 28       |                                       |                                      | 27           | 215.18       | 215.2            | 2.72                | 3.95                   |
|           | 28       |                                       |                                      | 90           | 299.2        | 299.33           | 1.47                |                        |
|           | 9        |                                       |                                      | 61           | 406.18       | 406.27           | 1.46                |                        |
|           | 10       |                                       |                                      | 88           | 382.17       | 382.23           | 1.3                 |                        |
|           | 25       |                                       |                                      | 85           | 293.1        | 293.18           | 0.96                |                        |

| Structure | Compound | IC <sub>50</sub> (μM) @<br>100 μM ATP | IC <sub>50</sub> (μM) @<br>25 μM ATP | yield<br>(%) | Mass ([M+H]) | observed<br>Mass | Rt (min) (LC<br>MS) | Rt (min)<br>(prepHPLC) |
|-----------|----------|---------------------------------------|--------------------------------------|--------------|--------------|------------------|---------------------|------------------------|
|           | 22       |                                       |                                      | 45           | 422.18       | 422.32           | 1.14                | 2.57                   |
|           | 30       |                                       |                                      | 16           | 436.16       | 436.36           | 1.13                | 3.18                   |
|           | 31       |                                       |                                      | 72           | 345.22       | 345.29           | 0.92                | 2.76                   |
|           | 3        |                                       |                                      | 84           | 222.99       | 223.08           | 1.07                |                        |
|           | 4        |                                       |                                      | 48           | 472.08       | 472.18           | 1.46                |                        |
|           | 6        |                                       |                                      | 57           | 472.08       | 472.24           | 1.64                |                        |
|           | 32       |                                       |                                      | 80           | 422.18       | 422.24           | 1.22                | 3.33                   |
|           | BRD5145  | <b>56.43</b>                          | <b>27.14</b>                         | 24           | 294.13       | 294.28           | 0.92                | 2                      |
|           | BRD3055  | <b>138</b>                            | <b>71</b>                            | 32           | 342.13       | 342.14           | 1.07                | 2.44                   |
|           | BRD5294  | <b>78</b>                             | <b>31</b>                            | 5            | 370.16       | 370.18           | 1.26                | 2.2                    |

| Structure | Compound | IC <sub>50</sub> (μM) @ 100 μM ATP | IC <sub>50</sub> (μM) @ 25 μM ATP | yield (%) | Mass ([M+H]) | observed Mass | Rt (min) (LC MS) | Rt (min) (prepHPLC) |
|-----------|----------|------------------------------------|-----------------------------------|-----------|--------------|---------------|------------------|---------------------|
|           | BRD8469  | <b>35</b>                          | <b>16</b>                         | 28        | 388.15       | 388.15        | 1.12             | 3.18                |
|           | BRD3849  | <b>32</b>                          | <b>16</b>                         | 9         | 388.14       | 388.18        | 1.27             | 2.29                |
|           | BRD4701  | <b>55</b>                          | <b>25</b>                         | 18        | 388.16       | 388.25        | 1.15             | 2.2                 |
|           | BRD3844  | <b>18</b>                          | <b>7.9</b>                        | 9         | 413.13       | 413.16        | 1.15             | 2.15                |
|           | BRD0073  | <b>166</b>                         | <b>64</b>                         | 2         | 308.15       | 308.22        | 0.8              | 3.31                |
|           | BRD2048  | <b>224</b>                         | <b>98</b>                         | 43        | 356.15       | 356.18        | 1.05             | 3.97                |
|           | BRD0124  | <b>246</b>                         | <b>111</b>                        | 15        | 384.18       | 384.22        | 1.27             | 2.59                |
|           | BRD5432  | <b>246</b>                         | <b>66</b>                         | 14        | 382.16       | 382.19        | 1.25             | 2.5                 |
|           | BRD0277  | <b>41</b>                          | <b>21</b>                         | 12        | 400.15       | 400.21        | 1.25             | 2.57                |
|           | BRD7488  | <b>116</b>                         | <b>39</b>                         | 25        | 412.17       | 412.22        | 1.23             | 2.49                |



| Structure | Compound | IC <sub>50</sub> (μM) @<br>100 μM ATP | IC <sub>50</sub> (μM) @<br>25 μM ATP | yield<br>(%) | Mass ([M+H]) | observed<br>Mass | Rt (min) (LC<br>MS) | Rt (min)<br>(prepHPLC) |
|-----------|----------|---------------------------------------|--------------------------------------|--------------|--------------|------------------|---------------------|------------------------|
|           | BRD5149  | <b>18</b>                             | <b>8.6</b>                           | 16           | 460.07       | 460.13           | 1.42                | 3.51                   |
|           | BRD9581  | <b>31</b>                             | <b>14</b>                            | 18           | 427.15       | 427.13           | 1.24                | 2.46                   |
|           | BRD1524  | <b>&gt;714</b>                        | <b>&gt;714</b>                       | 17           | 322.16       | 322.22           | 0.94                | 3.6                    |
|           | BRD6240  | <b>&gt;714</b>                        | <b>181</b>                           | 22           | 370.16       | 370.18           | 1.12                | 3.28                   |
|           | BRD0919  | <b>&gt;186</b>                        | <b>&gt;186</b>                       | 26           | 368.19       | 1.26             | 3.08.36             | 3.23                   |
|           | BRD2874  | <b>359</b>                            | <b>104</b>                           | 23           | 396.18       | 396.26           | 1.14                | 4.07                   |
|           | BRD1703  | <b>207</b>                            | <b>93</b>                            | 15           | 414.17       | 414.21           | 1.21                | 2.77                   |
|           | BRD0939  | <b>189</b>                            | <b>88</b>                            | 13           | 426.19       | 426.25           | 1.33                | 2.93                   |
|           | BRD6081  | <b>49</b>                             | <b>30</b>                            | 8            | 474.09       | 474.17           | 1.62                | 1.82                   |

| Structure                                                                           | Compound | IC <sub>50</sub> (μM) @<br>100 μM ATP | IC <sub>50</sub> (μM) @<br>25 μM ATP | yield<br>(%) | Mass ([M+H]) | observed<br>Mass | Rt (min) (LC<br>MS) | Rt (min)<br>(prepHPLC) |
|-------------------------------------------------------------------------------------|----------|---------------------------------------|--------------------------------------|--------------|--------------|------------------|---------------------|------------------------|
| 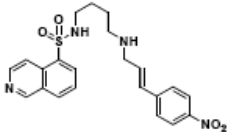   | BRD4397  | <b>64</b>                             | <b>26</b>                            | 5            | 441.16       | 441.16           | 1.33                | 1.75                   |
|    | BRD9330  | <b>4.6</b>                            | <b>2.1</b>                           | 9            | 462.07       | 462.2            | 1.41                | 3.9                    |
|    | BRD4009  | <b>2.1</b>                            | <b>1.0</b>                           | 34           | 295.13       | 295.15           | 0.47                | 3.97                   |
|    | BRD3407  | <b>6.4</b>                            | <b>3.7</b>                           | 13           | 309.14       | 309.24           | 0.83                | 1.98                   |
|   | BRD8198  | <b>6.6</b>                            | <b>2.8</b>                           | 6            | 474.09       | 474.2            | 1.35                | 4.09                   |
|  | BRD6632  | <b>&gt;186</b>                        | <b>46.43</b>                         | 25           | 336.18       | 336.22           | 0.98                | 4.02                   |
|  | BRD3747  | <b>361</b>                            | <b>133</b>                           | 24           | 484.21       | 484.25           | 1.53                | 4.25                   |
|  | BRD0756  | <b>172</b>                            | <b>136</b>                           | 8            | 520.19       | 520.3            | 1.88                | 3.95                   |
|  | BRD2424  | <b>19</b>                             | <b>5.4</b>                           | 7            | 574.18       | 574.19           | 1.59                | 3.73                   |
|  | BRD0330  | <b>&gt;186</b>                        | <b>&gt;186</b>                       | 11           | 350.19       | 350.23           | 0.96                | 4.18                   |

| Structure | Compound | IC <sub>50</sub> (μM) @<br>100 μM ATP | IC <sub>50</sub> (μM) @<br>25 μM ATP | yield<br>(%) | Mass ([M+H]) | observed<br>Mass | Rt (min) (LC<br>MS) | Rt (min)<br>(prepHPLC) |
|-----------|----------|---------------------------------------|--------------------------------------|--------------|--------------|------------------|---------------------|------------------------|
|           | BRD7012  | >186                                  | >186                                 | 6            | 460.21       | 460.31           | 1.47                | 4.27                   |
|           | BRD8564  | >186                                  | >186                                 | 9            | 502.25       | 502.3            | 2.09                | 3.87                   |
|           | BRD4835  | 213                                   | 114                                  | 13           | 498.22       | 498.28           | 1.82                | 4                      |
|           | BRD3291  | 129                                   | 14                                   | 14           | 534.2        | 534.26           | 1.77                | 4                      |
|           | BRD7419  | 77                                    | 46                                   | 18           | 558.24       | 558.3            | 1.76                | 3.88                   |
|           | BRD8747  | 96                                    | 43                                   | 21           | 588.19       | 588.19           | 1.65                | 3.83                   |
|           | BRD2686  | 216                                   | 161                                  | 24           | 512.24       | 512.32           | 2.48                | 4.34                   |
|           | BRD5822  | 290                                   | 137                                  | 32           | 548.22       | 548.29           | 1.61                | 3.9                    |
|           | BRD3146  | 238                                   | 126                                  | 16           | 572.26       | 572.27           | 1.92                | 4.05                   |

| Structure | Compound | IC <sub>50</sub> (μM) @<br>100 μM ATP | IC <sub>50</sub> (μM) @<br>25 μM ATP | yield<br>(%) | Mass ([M+H]) | observed<br>Mass | Rt (min) (LC<br>MS) | Rt (min)<br>(prepHPLC) |
|-----------|----------|---------------------------------------|--------------------------------------|--------------|--------------|------------------|---------------------|------------------------|
|           | BRD7402  | <b>63</b>                             | <b>53</b>                            | 19           | 602.21       | 602.22           | 1.76                | 3.28                   |
|           | BRD3116  | <b>130</b>                            | <b>56</b>                            | 6            | 656.04       | 656.22           | 1.94                | 4.52                   |
|           | BRD8902  | <b>16</b>                             | <b>5.9</b>                           | 11           | 414.15       | 414.22           | 1                   | 1.8                    |
|           | BRD3758  | <b>94</b>                             | <b>66</b>                            | 29           | 576.22       | 576.25           | 1.21                | 3.3                    |
|           | BRD1600  | <b>35</b>                             | <b>16</b>                            | 19           | 386.16       | 386.22           | 1.15                | 2.74                   |
|           | BRD5967  | <b>95</b>                             | <b>58</b>                            | 11           | 520.23       | 520.35           | 1.64                | 4.2                    |
|           | BRD9159  | <b>7.9</b>                            | <b>3.1</b>                           | 12           | 428.17       | 428.28           | 1.01                | 2.39                   |
|           | BRD3394  | <b>9.8</b>                            | <b>5.2</b>                           | 24           | 352.18       | 352.27           | 0.88                | 3.95                   |
|           | BRD5363  | <b>24</b>                             | <b>56</b>                            | 40           | 334.16       | 334.19           | 0.91                | 4.02                   |
|           | BRD1943  | <b>86</b>                             | <b>34</b>                            | 33           | 362.19       | 362.22           | 1.03                | 4.22                   |

| Structure | Compound | IC <sub>50</sub> (μM) @<br>100 μM ATP | IC <sub>50</sub> (μM) @<br>25 μM ATP | yield<br>(%) | Mass ([M+H]) | observed<br>Mass | Rt (min) (LC<br>MS) | Rt (min)<br>(prepHPLC) |
|-----------|----------|---------------------------------------|--------------------------------------|--------------|--------------|------------------|---------------------|------------------------|
|           | BRD3295  | >186                                  | 56                                   | 33           | 348.18       | 348.22           | 1                   | 4.22                   |
|           | BRD5665  | >186                                  | 61                                   | 52           | 362.19       | 326.22           | 0.83                | 0.92                   |
|           | BRD5656  | 212                                   | 88                                   | 27           | 368.15       | 368.15           | 1.46                | 3.78                   |
|           | BRD6148  | 51                                    | 26                                   | 35           | 366.18       | 366.2            | 1.13                | 4.12                   |
|           | BRD5445  | 34                                    | 27                                   | 34           | 410.2        | 410.2            | 1.16                | 4.22                   |
|           | BRD8218  | 35                                    | 30                                   | 29           | 408.21       | 408.21           | 1.15                | 4.15                   |
|           | BRD9569  | 39                                    | 29                                   | 50           | 488.09       | 488.13           | 1.52                | 4.15                   |
|           | BRD0112  | 46                                    | 15                                   | 29           | 335.16       | 335.22           | 0.96                | 3.43                   |

| Structure | Compound | IC <sub>50</sub> (μM) @ 100 μM ATP | IC <sub>50</sub> (μM) @ 25 μM ATP | yield (%) | Mass ([M+H]) | observed Mass | Rt (min) (LC MS) | Rt (min) (prepHPLC) |
|-----------|----------|------------------------------------|-----------------------------------|-----------|--------------|---------------|------------------|---------------------|
|           | BRD9740  | <b>3.6</b>                         | <b>2.0</b>                        | 50        | 349.17       | 349.24        | 0.89             | 3.11                |
|           | BRD0541  | <b>10</b>                          | <b>5.9</b>                        | 25        | 336.16       | 335.27        | 0.8              | 3.3                 |
|           | BRD1596  | <b>2.6</b>                         | <b>1.7</b>                        | 28        | 335.16       | 335.28        | 0.83             | 3.4                 |
|           | BRD8155  | <b>3.2</b>                         | <b>1.7</b>                        | 67        | 488.09       | 488.05        | 1.19             | 2.66                |
|           | BRD3615  | <b>9.8</b>                         | <b>3.9</b>                        | 11        | 682.06       | 682.13        | 2                | 4.1                 |
|           | BRD1869  | <b>59</b>                          | <b>50</b>                         | 89        | 306.13       | 306.29        | 0.88             | 2.29                |
|           | BRD6042  | <b>&gt;186</b>                     | <b>&gt;186</b>                    | 47        | 306.13       | 306.32        | 0.83             | 2.94                |
|           | BRD5087  | <b>20</b>                          | <b>9.1</b>                        | 80        | 306.13       | 306.25        | 0.96             | 3.68                |
|           | BRD5257  | <b>205</b>                         | <b>176</b>                        | 21        | 306.13       | 306.3         | 0.88             | 2.19                |
|           | BRD5930  | <b>0.81</b>                        | <b>0.28</b>                       | 20        | 320.15       | 320.3         | 0.82             | 2.93                |

| Structure | Compound | IC <sub>50</sub> (μM) @<br>100 μM ATP | IC <sub>50</sub> (μM) @<br>25 μM ATP | yield<br>(%) | Mass ([M+H]) | observed<br>Mass | Rt (min) (LC<br>MS) | Rt (min)<br>(prepHPLC) |
|-----------|----------|---------------------------------------|--------------------------------------|--------------|--------------|------------------|---------------------|------------------------|
|           | BRD5796  | <b>0.68</b>                           | <b>0.24</b>                          | 57           | 332.15       | 332.27           | 0.96(acid)          | 3.08                   |
|           | BRD8757  | <b>1.1</b>                            | <b>0.48</b>                          | 22           | 342.11       | 342.21           | 0.9                 | 3.62                   |
|           | BRD7032  | <b>2.9</b>                            | <b>0.94</b>                          | 71           | 318.13       | 318.31           | 0.8                 | 3.4                    |
|           | BRD7132  | <b>3.2</b>                            | <b>1.6</b>                           | 54           | 334.16       | 334.32           | 1.04                | 3.92                   |
|           | BRD9078  | <b>8.6</b>                            | <b>4.0</b>                           | 84           | 332.15       | 332.29           | 0.99                | 3.21                   |
|           | BRD2749  | <b>39</b>                             | <b>21</b>                            | 26           | 307.13       | 307.21           | 0.74                | 2.93                   |
|           | BRD7648  | <b>71</b>                             | <b>21</b>                            | 17           | 322.12       | 322.26           | 0.59                | 2.73                   |
|           | BRD5505  | <b>203</b>                            | <b>95</b>                            | 26           | 352.14       | 352.29           | 0.42                | 2.3                    |
|           | BRD4734  | <b>18</b>                             | <b>6.9</b>                           | 20           | 320.11       | 320.16           | 0.77                | 1.82                   |
|           | BRD0859  | <b>74</b>                             | <b>26</b>                            | 25           | 376.15       | 376.23           | 0.73                | 2.95                   |
|           | BRD7198  | <b>44</b>                             | <b>13</b>                            | 75           | 376.14       | 376.23           | 0.96                | 2.74                   |

| Structure                                                                           | Compound | IC <sub>50</sub> (μM) @<br>100 μM ATP | IC <sub>50</sub> (μM) @<br>25 μM ATP | yield<br>(%) | Mass ([M+H]) | observed<br>Mass | Rt (min) (LC<br>MS) | Rt (min)<br>(prepHPLC) |
|-------------------------------------------------------------------------------------|----------|---------------------------------------|--------------------------------------|--------------|--------------|------------------|---------------------|------------------------|
| 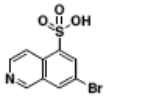   | 12       |                                       |                                      | 85           |              |                  |                     |                        |
|    | 13       |                                       |                                      | 64           | 406.18       | 406.09           | 1.42                |                        |
|    | 14       |                                       |                                      | 74           | 418.18       | 418.26           | 1.37                |                        |
|    | BRD5319  | <b>0.14</b>                           | <b>0.065</b>                         | 57           | 306.13       | 306.27           | 0.81                | 2.62                   |
|    | BRD7953  | <b>3.7</b>                            | <b>1.8</b>                           | 7            | 336.1        | 336.19           | 0.59                | 0.99                   |
|   | BRD9949  | <b>0.032</b>                          | <b>0.02</b>                          | 18           | 321.14       | 321.23           | 0.93                | 1.73                   |
|  | BRD7071  | <b>0.87</b>                           | <b>0.42</b>                          | 76           | 321.14       | 321.31           | 0.86(acid)          | 1.67                   |
|  | BRD2880  | <b>0.53</b>                           | <b>0.24</b>                          | 26           | 347.13       | 347.21           | 0.73(acid)          | 1.09                   |
|  | BRD3192  | <b>0.11</b>                           | <b>0.037</b>                         | 55           | 347.13       | 347.3            | 0.79                | 1.9                    |



| Structure                                                                           | Compound | IC <sub>50</sub> (μM) @<br>100 μM ATP | IC <sub>50</sub> (μM) @<br>25 μM ATP | yield<br>(%) | Mass ([M+H]) | observed<br>Mass | Rt (min) (LC<br>MS) | Rt (min)<br>(prepHPLC) |
|-------------------------------------------------------------------------------------|----------|---------------------------------------|--------------------------------------|--------------|--------------|------------------|---------------------|------------------------|
| 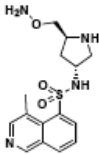   | BRD7569  | <b>0.15</b>                           | <b>0.067</b>                         | 23           | 337.14       | 337.34           | 0.22                | 1.83                   |
|    | BRD8899  | <b>0.025</b>                          | <b>0.011</b>                         | 11           | 363.15       | 363.25           | 0.88                | 2.4                    |
|    | BRD5749  | <b>1.2</b>                            | <b>0.52</b>                          | 51           | 363.15       | 363.28           | 0.9                 | 2.95                   |
|    | BRD4717  | <b>0.14</b>                           | <b>0.073</b>                         | 34           | 476.24       | 476.26           | 0.82                | 3.04                   |
|  | BRD1469  | <b>0.13</b>                           | <b>0.061</b>                         | 48           | 476.24       | 476.44           | 0.77                | 3.23                   |
|  | BRD0200  | <b>0.21</b>                           | <b>0.084</b>                         | 24           | 406.23       | 406.29           | 0.68                | 3.88                   |
|  | BRD8254  | <b>1.0</b>                            | <b>0.26</b>                          | 37           | 406.23       | 406.39           | 1                   | 3.03                   |

| Structure                                                                           | Compound | IC <sub>50</sub> (μM) @<br>100 μM ATP | IC <sub>50</sub> (μM) @<br>25 μM ATP | yield<br>(%) | Mass ([M+H]) | observed<br>Mass | Rt (min) (LC<br>MS) | Rt (min)<br>(prepHPLC) |
|-------------------------------------------------------------------------------------|----------|---------------------------------------|--------------------------------------|--------------|--------------|------------------|---------------------|------------------------|
| 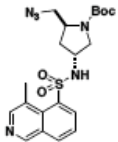   | 23       |                                       |                                      | 82           | 447.18       | 447.39           | 1.41                |                        |
|    | 18       |                                       |                                      | 69           | 447.18       | 447.39           | 1.42                |                        |
|    | 19       |                                       |                                      | 46           | 421.19       | 421.46           | 1.15                | 2.37                   |
|    | BRD2816  | >186                                  | >186                                 | 51           | 463.2        | 463.33           | 1.2                 | 3.62                   |
|   | 33       |                                       |                                      | 43           | 463.2        | 463.58           | 1.25                |                        |
|  | BRD2916  | 31                                    | 15                                   | 68           | 308.11       | 308.2            | 0.96                | 2.88                   |
|  | BRD6284  | 81                                    |                                      | 12           | 502.06       | 502.18           | 1.73                | 4.32                   |

# Scheme S1.

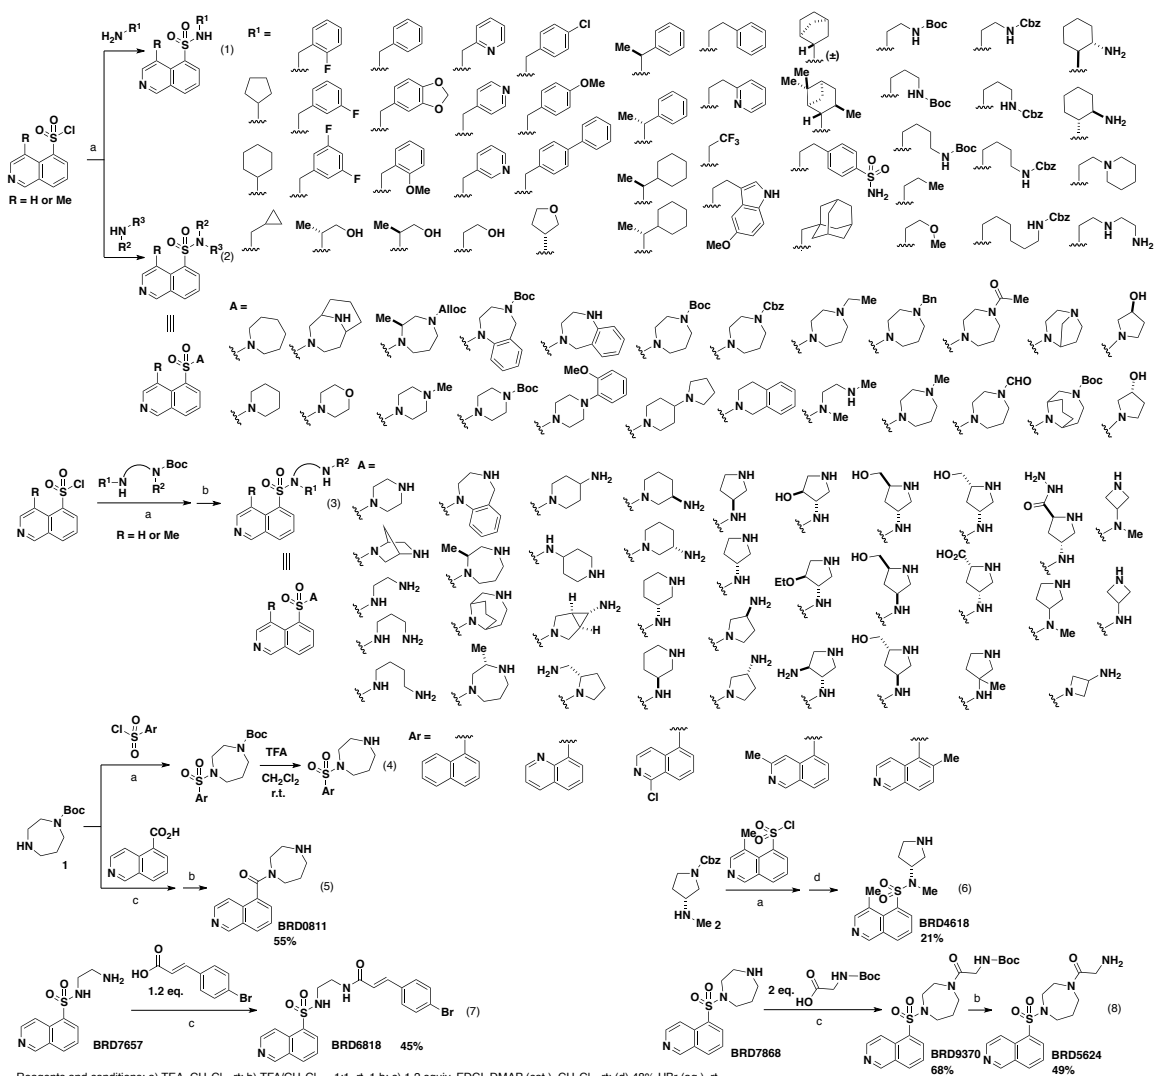

Reagents and conditions: a) TEA,  $\text{CH}_2\text{Cl}_2$ , rt; b) TFA/ $\text{CH}_2\text{Cl}_2$  = 1:1, rt, 1 h; c) 1.2 equiv. EDCI, DMAP (cat.),  $\text{CH}_2\text{Cl}_2$ , rt; (d) 48% HBr (aq), rt.

## Scheme S2.

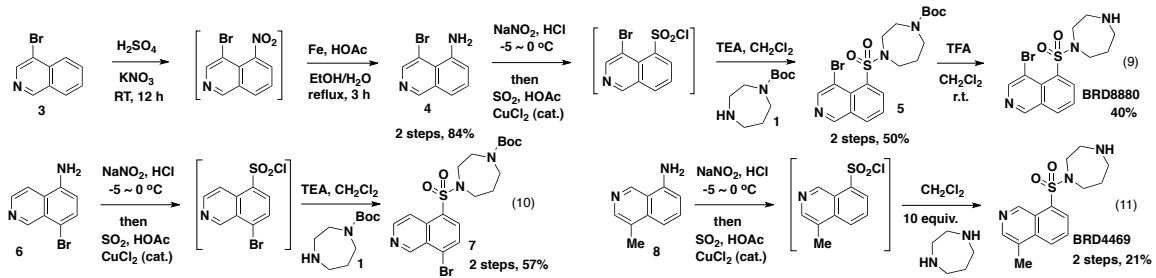

## Scheme S3.

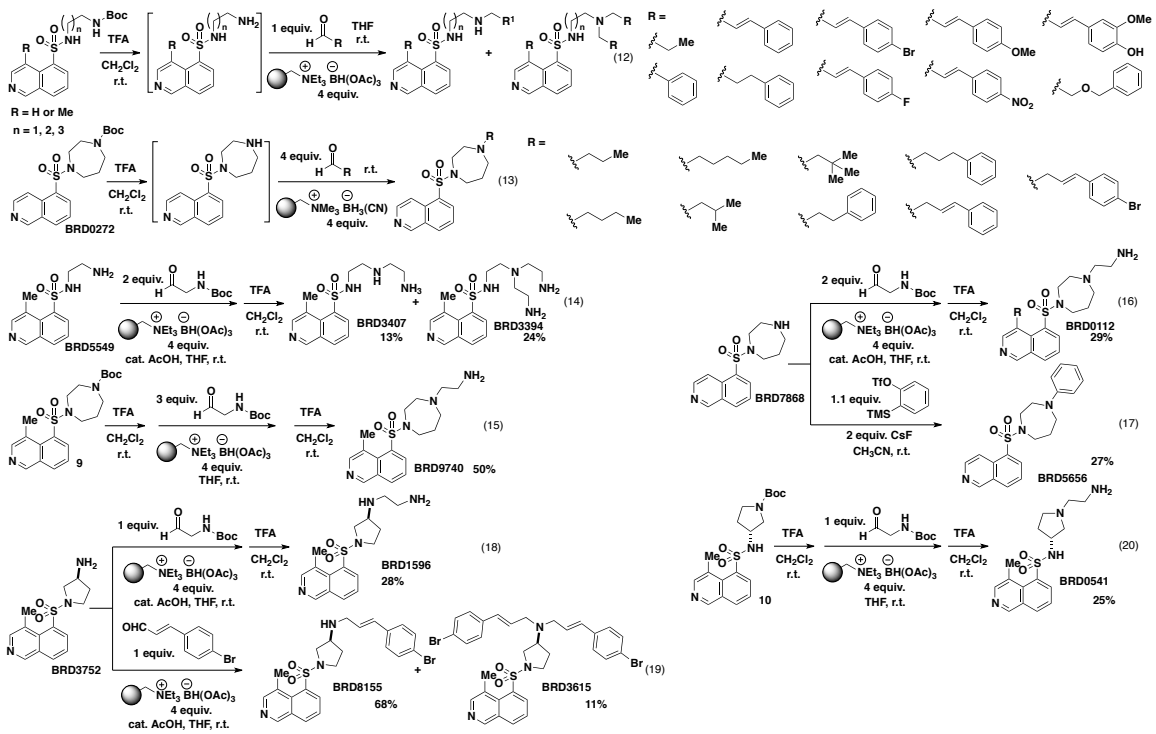



## Materials and Methods.

Human full length STK33 containing an amino terminal histidine tag purified from Sf21 cells was purchased from Millipore Corporation (catalog # 14-671-K). Myelin basic protein (bovine) was purchased from Millipore Corporation (catalog # 13-104). ATP, ADP, MOPS, MgCl<sub>2</sub>, Brij-35, glycerol, 2-mercaptoethanol, and BSA were purchased from Sigma-Aldrich. The 384-well general plates were purchased from VWR (Corning 3570); 384-well low volume plates were purchased from Greiner Bio-One (384W SV, HiBase, PS, LUMITRAC 200, Medium Binding, 30uL/well, catalog # 784075). CyBi<sup>®</sup>-Well vario was purchased from CyBio AG. CyBi tips were purchased from CyBio AG (CyBi-Tip Trays 384 standard; catalog # OL 3800-25-513-N). HTRF Transcreeper ADP assay was purchased from Cis-bio US (catalog # 62ADPPEC); ADP-Glo assays were purchased from Promega Corporation (catalog # V9103). The Envision 2012 multilabel reader was purchased from PerkinElmer, Inc. Multidrop Combi reagent dispenser and cassettes were purchased from Thermo Fisher Scientific, Inc.

Dry solvents were dispensed from a solvent purification system that passes solvents through packed columns (THF and CH<sub>2</sub>Cl<sub>2</sub>: dry neutral alumina; toluene: dry neutral alumina and Q5 reactant). Unless otherwise stated, all reagents were obtained from commercial sources and used without further purification. MP-triacetoxyborohydride (Macroporous triethylammonium methylpolystyrene triacetoxyborohydride) was purchased from Biotage (catalog# 800413, 1.8~2.4 mmol/g). <sup>1</sup>H NMR spectra were recorded on Varian Unity/Inova 500 (500MHz), or Bruker Ultrashield 300(300MHz) spectrometers. <sup>1</sup>H data are reported as follows: chemical shift in parts per million relative to CHCl<sub>3</sub> (7.27 ppm) or CH<sub>3</sub>OH (4.30 and 3.67 ppm) multiplicity (s, singlet; d, doublet; t, triplet; q, quartet; m, multiplet; br, broadened), coupling constant (Hz), and integration. <sup>13</sup>C magnetic resonance spectra were recorded on Varian Unity/Inova 500(125MHz) or Bruker Ultrashield 300(75MHz) spectrometers. <sup>13</sup>C chemical shifts are reported in parts per million relative to solvent. All <sup>13</sup>C spectra were determined with broadband decoupling.

Flash chromatography was performed either on EM Science silica gel 60 (230–400 mesh) or using a CombiFlash companion system (Teledyne ISCO, Inc.) with pre-packed FLASH silica gel columns (Biotage, Inc.). Compound purity and identity were determined by LC-MS (Alliance 2795, Waters, Milford, MA). Purity was measured by UV absorbance at 210 nm. Identity was determined on a SQ mass spectrometer by positive electrospray ionization. Mobile phase A consisted of either 0.01% ammonium hydroxide or 0.01% formic acid in water, while mobile phase B consisted of the same additives in acetonitrile. The gradient ran from 5% to 95% mobile phase B over 1.6 minutes at 3 mL/min. An XBridge C18, 3.5 um, 4.6x30 mm column was used with column temperature maintained at 40°C. 5 µL of sample solution were injected. Compounds were purified by mass-directed purification on a Waters Autopurification system (Milford, MA) (reverse-phase prep-HPLC). Collection was triggered on the (M+H)<sup>+</sup> and (M+Na)<sup>+</sup> ions on a ZQ mass spectrometer using positive electrospray ionization. Mobile phase A consisted of either 0.2% ammonium hydroxide in water, while mobile phase B consisted of the same additive in acetonitrile. The gradient ran from 5% to 95% mobile phase B over 5.0 minutes at 44 mL/min. An XBridge OBD Prep

C18, 5  $\mu$ m, 19x50 mm column was used at room temperature. The solvent gradient is determined by the retention time (RT) measured in LC-MS.

| Retention Time (RT) LC-MS (min) | Purification Inlet Method |
|---------------------------------|---------------------------|
| 0.46~0.60                       | prep5min_5iso             |
| 0.61~0.75                       | prep5min_10iso            |
| 0.76~0.84                       | prep5min_10_15            |
| 0.85~1.06                       | prep5min_15_30            |
| 1.07~1.32                       | prep5min_20_35            |
| 1.33~1.52                       | prep5min_30_45            |
| 1.53~1.73                       | prep5min_45_60            |
| 1.74~1.81                       | prep5min_55_75            |

### Kinase assay:

Kinase reactions were performed under 10 mM MOPS-NaOH (pH 7.0), 10 mM  $MgCl_2$ , 0.3 mM EDTA, 0.001% Brij-35, 0.5% glycerol, 0.01% 2-mercaptoethanol, and 0.1 mg/mL BSA. Reactions were initiated by the addition of ATP and incubated at 30 °C or room temperature for the indicated time. The enzyme concentration (STK33) and substrate concentration (MBP and ATP) were variable depending on the experiment. For inhibitors with  $IC_{50} < 200$  nM, the STK33 concentration was reduced to 9.6 nM and the kinase reaction time was extended to 120 minutes. Negative control (DMSO) was scaled to 100% kinase activity, whereas positive control (0.16  $\mu$ M staurosporine, 100% inhibition) was scaled to 0% kinase activity.

For the HTRF assay, ADP-d2 and  $\alpha$ -ADP-Cryptate solution was mixed at a 1:1 ratio to make the detection mixture. The detection mixture was added with an equal volume of the kinase reaction. The plate was incubated at room temperature for 60 minutes, after which fluorescence was read on an Envision instrument.

For the ADP-Glo assay, the kinase reaction solution and ADP-Glo reagent were mixed at a 1:1 ratio (totally 20  $\mu$ L), which were incubated at room temperature for 50 minutes. Kinase detection reagent (20  $\mu$ L) was added. The mixture was further incubated for 25 ~ 40 minutes before the plate was read on Envision for luminescence intensity.

### STK33 HTRF (Homogeneous Time Resolved Fluorescence) assay protocol for screening inhibitors

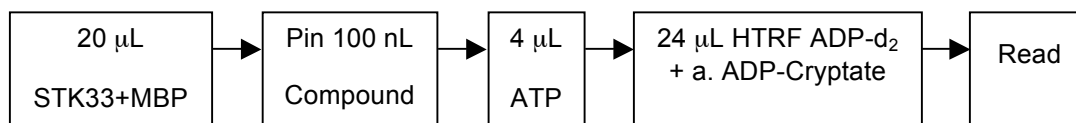

1. Add 20 mL total volume of STK33+MBP mixture (38.4 nM STK33, 24.5 μM MBP, 10 mM MOPS-NaOH, pH 7.0, 10 mM MgCl<sub>2</sub>, 0.36 mM EDTA, 0.0012% Brij-35, 0.6% glycerol, 0.012% 2-mercaptoethanol, 0.12 mg/mL BSA) to 384-well general plates using Combi with Standard Cassette, high speed; fast spin down.
2. Pin transfer Compounds (100 nL)
3. After 15 minutes under room temperature, add 4 μL ATP (10 mM MOPS-NaOH, pH 7.0, 10 mM MgCl<sub>2</sub>) with Combi, small cassette, high speed; note time of adding ATP to first plate, keep plates in order; spin down.
4. Incubate at room temperature for 70 minutes, starting from time of first plate from step 4.
5. Add 24 μL total volume of HTRF reagent mixture (1:1 mixture of ADP-d<sub>2</sub> and a. ADP-Cryptate) to the 384-well general plates using Combi with small Cassette, high speed; fast spin down.
6. Incubate at room temperature for 60 minutes; read fluorescence on Envision 1 (Protocol: Cisbio HTRF Protocol; Label:LANCE-Cisbio HTRF Protocol)

#### Standard Curve:

In order to calibrate the backgrounds under different ATP concentrations, standard curves are made based on the standard solutions with different ATP/ADP ratios. The ratio of emission intensity at 620 nm and 665 nm are calculated. Sigmoidal (variable slope) regression of ratio-[ADP] plot gives the equation:

$$\text{Ratio} = \text{Bottom} + (\text{Top}-\text{Bottom}) / [1+(\text{EC}50/[\text{ADP}])^{\text{HillSlope}}]$$

Preparation of ATP to ADP conversion curves ([ATP]+[ADP]=100 mM)

|              |     |       |       |       |       |       |       |     |
|--------------|-----|-------|-------|-------|-------|-------|-------|-----|
| % Conversion | 100 | 33.33 | 11.11 | 3.70  | 1.23  | 0.41  | 0.14  | 0   |
| [ADP] (mM)   | 100 | 33.33 | 11.11 | 3.70  | 1.23  | 0.41  | 0.14  | 0   |
| [ATP] (mM)   | 0   | 66.67 | 88.99 | 96.30 | 98.77 | 99.59 | 99.86 | 100 |

#### STK33 ADP-Glo assay protocol for screening inhibitors

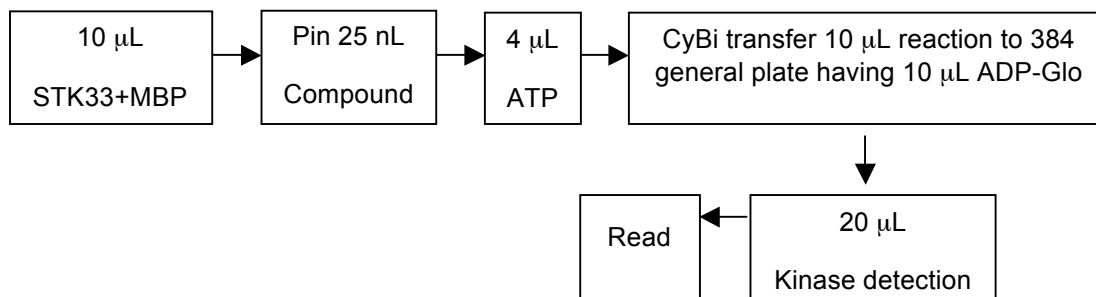



1. Add 10 mL total volume of STK33+MBP mixture (38.4 nM STK33, 24.5 μM MBP, 10 mM MOPS-NaOH, pH 7.0, 10 mM MgCl<sub>2</sub>, 0.42 mM EDTA, 0.0014% Brij-35, 0.7% glycerol, 0.014% 2-mercaptoethanol, 0.14 mg/mL BSA) to 384-well low volume plates using Combi with Standard Cassette, high speed; fast spin down.
2. Pin transfer Compounds (25 nL)
3. After 15 minutes under room temperature, add 4 μL ATP (10 mM MOPS-NaOH, pH 7.0, 10 mM MgCl<sub>2</sub>) with Combi, small cassette, high speed; note time of adding ATP to first plate, keep plates in order; spin down.
4. Incubate at room temperature for 70 minutes, starting from time of first plate from step 4.
5. Add 10 μL total volume of ADP-Glo reagent mixture to 384-well general plates using Combi with Standard Cassette, high speed.
6. Transfer 10 mL reaction mixture using CyBi (program file: STK33\_v5) to 384-well general plates having the ADP-Glo reagent; note time of transfer.
7. Incubate at room temperature for 50 minutes.
8. Add 20 mL ADP-Glo kinase detection reagent using Combi with Standard Cassette, high speed; note time of transfer.
9. Incubate at room temperature for 35 minutes; read luminescence on Envision 1 (Protocol: Kinase-Glo 384 lum; Label: USLum-JoshK-US LUM 384 (cps))

#### Standard Curve:

In order to calibrate the backgrounds under different ATP concentrations, standard curves are made based on the standard solutions with different ATP/ADP ratios. Given the low conversion of ATP in the screening (<5%), the range of [ADP] is between 0 and 5 mM. Linear regression of Luminescence-[ADP] plot gives the equation:

$$\text{Luminescence} = \text{HillSlope} * [\text{ADP}] + \text{Y-intercept}$$

#### Preparation of ATP to ADP conversion curves ([ATP]+[ADP]=100 mM)

|              |    |    |    |    |      |    |      |     |
|--------------|----|----|----|----|------|----|------|-----|
| % Conversion | 5  | 4  | 3  | 2  | 1.5  | 1  | 0.5  | 0   |
| [ADP] (mM)   | 5  | 4  | 3  | 2  | 1.5  | 1  | 0.5  | 0   |
| [ATP] (mM)   | 95 | 96 | 97 | 98 | 98.5 | 99 | 99.5 | 100 |

### **General procedure for synthesizing sulfonamides from sulfonyl chloride and amine:**

The amine (1.5 ~ 5 equiv.) and TEA (5 equiv.) were dissolved in anhydrous dichloromethane in a 4 mL capped vial. The solution was cooled in an ice bath and sulfonyl chloride (1 equiv.) was added. The ice bath was then removed; the solution was allowed to warm to room temperature and stirred overnight. The volatiles were removed by purging air. For Boc-protected diamines, removal of the protection was affected by treating the residue with 1:1 TFA/CH<sub>2</sub>Cl<sub>2</sub> for 1 h at room temperature. The volatiles were removed under reduced pressure. The residue was purified by prep-HPLC or flash chromatography over SiO<sub>2</sub>.

### **General procedure for coupling carboxylic acid and amine:**

To a solution of carboxylic acid (1~2 equiv.), amine (1 equiv.) and *N,N*-dimethylaminopyridine (DMAP, 0.1 equiv.) in dry CH<sub>2</sub>Cl<sub>2</sub> was added *N*-(3-Dimethylaminopropyl)-*N'*-ethylcarbodiimide hydrochloride (EDCI, 1.2 equiv.) at 0 °C with stirring. The reaction mixture was stirred at room temperature overnight. The mixture was quenched with water and extracted with EtOAc. The organic layers were then washed with saturated brine, dried over sodium sulfate, filtered, and evaporated under reduced pressure. The residue was purified by prep-HPLC.

### **General procedure for nitration and reduction to make aromatic amine:**

In a 20 mL capped vial was 4-bromoisoquinoline **3** (3g, 14 mmol) in sulfuric acid (5 mL, 92 mmol) to give light yellow solution. Under ice-cooling, a solution of potassium nitrate (1.6 g, 16 mmol) in 3 mL sulfuric acid was added dropwise. After 20h of stirring under room temperature the reaction mixture was poured in iced water (80 mL) containing aqueous ammonia (20 mL) and extracted with EA (100 mL × 3). The extract was dried over anhydrous sodium sulfate, and the solvent was distilled off under reduced pressure. In a 500 mL round-bottom flask was the residue in adding EtOH/H<sub>2</sub>O (80 mL) to give a yellow suspension. Acetic acid (6 g, 101 mmol) and iron (2.4 g, 43 mmol) were added. The solution was refluxed for 3 h. The acetic acid and alcohol were removed under vacuo. Saturated NaHCO<sub>3</sub> solution was added to basify the solution. Filtration was performed and the residue was extensively washed with EA. The filtrate was extracted with EA (100 mL × 4). The organic phase was combined and dried over anhydrous sodium sulfate. The solvent was removed *in vacuo* and the residue was purified via flash chromatography on silica (80g column, eluted by 0~5% MeOH in CH<sub>2</sub>Cl<sub>2</sub>) to give 4-bromoisoquinolin-5-amine **4** (2.7 g, 12 mmol, 84% yield) as a yellow solid.

### **General procedure for synthesizing sulfonyl chloride from aromatic amine:**

In a 20 mL capped vial, 4-bromoisoquinolin-5-amine **4** (106 mg, 0.475 mmol) was placed in concentrated hydrochloric acid (37% HCl, 2 mL) to give a yellow solution. Under ice-cooling, sodium nitrite (42.6 mg, 0.618 mmol) dissolved in water was added slowly. The stirring was continued for 15 minutes in an ice bath before the reaction mixture was pouring into the solution made by bubbling (15 min) sulfur dioxide into acetic acid (4 mL) in the presence of cupric chloride hydrate (50 mg, 0.293 mmol).

The mixture was stirred under room temperature for 1 h. Excess acetic acid was removed under reduced pressure. The solution was neutralized by adding a saturated NaHCO<sub>3</sub> solution, after which extraction with CH<sub>2</sub>Cl<sub>2</sub> (20 mL × 3) was performed. The organic phase was combined and dried over anhydrous sodium sulfate. The solvent was removed *in vacuo*, and the residue was dissolved in dry CH<sub>2</sub>Cl<sub>2</sub> (3 mL). *Tert*-butyl 1,4-diazepane-1-carboxylate **1** (0.3 mL, 1.4 mmol) and TEA (0.1 mL, 0.72 mmol) were added. The mixture was stirred overnight under room temperature, concentrated, and purified by flash chromatography on silica (4g column, eluted by 0~100% EA in hexane) to give *tert*-butyl 4-(4-bromoisoquinolin-5-ylsulfonyl)-1,4-diazepane-1-carboxylate **5** (112 mg, 0.239 mmol, 50% yield) as a white solid.

#### **General procedure for reductive amination:**

MP-triacetoxyborohydride (4 equiv.) was added to the solution of amine (1 equiv.) and aldehyde (1~4 equiv.) in dry THF. The mixture was stirred overnight, after which filtration was performed, and the resin was washed with methanol. The combined solution was concentrated, and the product was purified by prep-HPLC.

#### **General procedure for Suzuki coupling:**

In a microwave tube, substrate (1 equiv.), Pd(PPh<sub>3</sub>)<sub>4</sub> (0.1 equiv.), K<sub>2</sub>CO<sub>3</sub> (3 equiv.), and boronic acid (1~3 equiv.) were added. The tube was sealed and THF/water was added through a syringe. After degassing, the resulting mixture was heated to 90 °C for 4-12 h before cooling to room temperature and filtering through Celite. Upon removal of the solvents, the residue was purified through flash chromatography or subjected to TFA/CH<sub>2</sub>Cl<sub>2</sub> (1:1) solution for deprotection. The de-Boc product was purified by prep-HPLC. When Molander reagent was used instead of boronic acid, the Pd(dppf)Cl<sub>2</sub> was used as the palladium catalyst and Cs<sub>2</sub>CO<sub>3</sub> was used as the base.

#### **General procedure for hydrogenation:**

In a round-bottom flask, substrate, palladium on activated charcol (10% Pd basis, 20~100% weight of substrate), and methanol were added. After degassing with hydrogen, the mixture was stirred under hydrogen at room temperature for 3 h before filtering through a syringe filter. Upon removal of the solvents, the residue was purified by prep-HPLC.

#### **General procedure for Mitsunobu reaction:**

To a stirred solution of alcohol substrate (1 equiv.), triphenylphosphine (1.5~2 equiv.), and N-hydroxyphthalimide (2 equiv.) in dry CH<sub>2</sub>Cl<sub>2</sub>, DIAD (2 equiv.) was added at 0 °C. After 2~8 h at room temperature, the reaction mixture was concentrated. Hydrazine hydrate was added at room temperature to the crude product in methanol. The stirring was continued at the same temperature for 1 h. The solvent was removed under reduced pressure. The residue solid was purified by prep-HPLC or subjected to deprotection of Boc (1:1 TFA/CH<sub>2</sub>Cl<sub>2</sub>, 1 h, room temperature).

### General procedure for converting hydroxyl group to azide:

Method 1: To a stirred solution of alcohol (1 equiv.) in dry DMF was added bis (2,4-dichlorophenyl) phosphorochloridate (1.5 ~ 3 equiv.) at room temperature. The reaction mixture was stirred at 60 °C for 24 h and then quenched by the addition of water. The layers were separated and the aqueous layer was backextracted with EA. The combined organic layer was washed with brine and dried over anhydrous sodium sulfate.

Method 2: To a stirred solution of alcohol (1 equiv.) in dry CH<sub>2</sub>Cl<sub>2</sub> was added TEA (2 equiv.) and methanesulfonyl chloride (2 equiv.) at 0 °C. The reaction mixture was stirred at 0 °C for 2 h and then quenched by the addition of saturated NaHCO<sub>3</sub> (aq.). The layers were separated and the aqueous layer was extracted with CH<sub>2</sub>Cl<sub>2</sub>. The combined organic layer was washed with brine and dried over anhydrous sodium sulfate. The solvent was removed *in vacuo*, and the residue was dissolved in dry DMF, after which NaN<sub>3</sub> (10 equiv.) was added. The reaction mixture was stirred at 90 °C for 8 h, after which DMF was removed under reduced pressure. The residue was partitioned between brine and EA. The aqueous phase was extracted by EA. The combined organic layer was dried over anhydrous sodium sulfate. The solvent was removed *in vacuo* and the residue was purified by flash chromatography on silica (4g column, eluted by 0~100% EA in hexane) to give the azide.

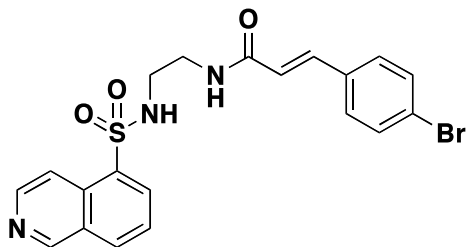

**(E)-3-(4-bromophenyl)-N-(2-(isoquinoline-5-sulfonamido)ethyl)acrylamide (BRD6818).** <sup>1</sup>H NMR (300 MHz, CHLOROFORM-d)  $\delta$  = 3.17 (2 H, td, J=3.7, 1.6 Hz), 3.49 (2 H, t, J=5.7 Hz), 6.22 (2 H, m), 7.31 (2 H, s), 7.43 (1 H, s), 7.49 (2 H, d, J=7.2 Hz), 7.71 (1 H, t, J=7.8 Hz), 8.19 (1 H, d, J=8.3 Hz), 8.45 (2 H, dd, J=7.3, 1.1 Hz), 8.69 (1 H, d, J=6.2 Hz), 9.32 (1 H, s) ppm.

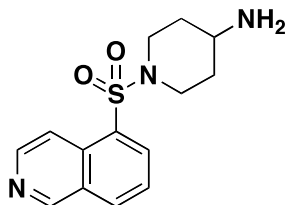

**1-(isoquinolin-5-ylsulfonyl)piperidin-4-amine (BRD3518).**  $^1\text{H}$  NMR (500 MHz, CHLOROFORM-*d*)  $\delta$  = 1.32 - 1.45 (2 H, m), 1.52 (4 H, br. s.), 1.86 (2 H, d,  $J=13.2$  Hz), 2.63 - 2.76 (3 H, m), 3.78 (2 H, d,  $J=12.7$  Hz), 7.73 (1 H, t,  $J=7.6$  Hz), 8.23 (1 H, d,  $J=7.8$  Hz), 8.40 (1 H, d,  $J=6.3$  Hz), 8.52 (1 H, d,  $J=6.3$  Hz), 8.70 (1 H, d,  $J=5.9$  Hz), 9.37 (1 H, s) ppm.

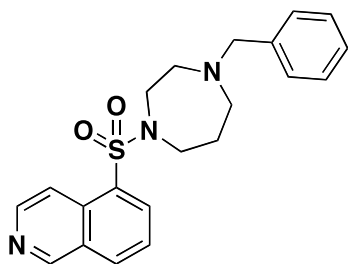

**5-(4-benzyl-1,4-diazepan-1-ylsulfonyl)isoquinoline (BRD5076).**  $^1\text{H}$  NMR (300 MHz, CHLOROFORM-*d*)  $\delta$  = 1.18 (1 H, s), 1.69 - 1.88 (2 H, m), 2.53 - 2.73 (4 H, m), 3.34 - 3.48 (4 H, m), 3.56 (2 H, s), 7.07 - 7.30 (7 H, m), 7.61 (1 H, t,  $J=7.8$  Hz), 8.12 (1 H, d,  $J=8.1$  Hz), 8.28 (1 H, dd,  $J=7.3, 1.1$  Hz), 8.39 (1 H, d,  $J=6.2$  Hz), 8.61 (1 H, d,  $J=6.2$  Hz), 9.28 (1 H, s) ppm;  $^{13}\text{C}$  NMR (75 MHz, CHLOROFORM-*d*)  $\delta$  = 28.2, 46.8, 48.1, 54.4, 55.9, 62.1, 117.7, 125.8, 127.2, 128.3, 128.8, 129.2, 131.7, 133.0, 133.3, 134.6, 145.0, 153.2 ppm.

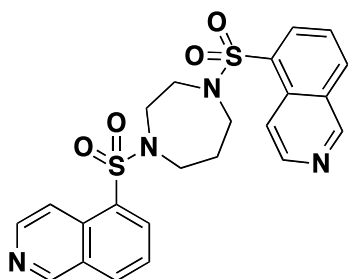

**1,4-bis(isoquinolin-5-ylsulfonyl)-1,4-diazepane (BRD2660).**  $^1\text{H}$  NMR (300 MHz, CHLOROFORM-*d*)  $\delta$  = 2.13 (2 H, s), 3.55 - 3.64 (8 H, m), 7.73 (2 H, t,  $J=7.8$  Hz), 8.20 - 8.43 (4 H, m), 8.72 (2 H, d,  $J=6.0$  Hz), 9.39 (2 H, d,  $J=0.9$  Hz) ppm.

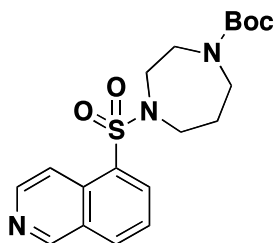

**tert-butyl 4-(isoquinolin-5-ylsulfonyl)-1,4-diazepane-1-carboxylate (BRD0272).**  $^1\text{H}$  NMR (300 MHz, CHLOROFORM-*d*)  $\delta$  = 1.43 (9 H, s), 1.94 - 1.99 (2 H, m), 3.34 - 3.48 (4 H, m), 3.48 - 3.58 (4 H, m), 7.71 (1 H, t,  $J=7.8$  Hz), 8.31 (1 H, d,  $J=8.1$  Hz), 8.28 (1 H, dd,  $J=7.3, 1.1$  Hz), 8.41 (1 H, d,  $J=6.2$  Hz), 8.70 (1 H, d,  $J=6.2$  Hz), 9.35 (1 H, s) ppm.

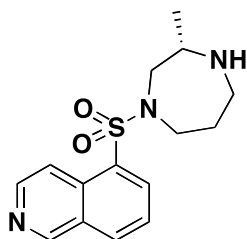

**(S)-5-(3-methyl-1,4-diazepan-1-ylsulfonyl)isoquinoline (BRD4719).**  $^1\text{H}$  NMR (500 MHz, CHLOROFORM-*d*)  $\delta$  = 1.07 (3 H, d,  $J=6.3$  Hz), 1.66 (2 H, d,  $J=2.4$  Hz), 1.72 - 1.84 (1 H, m), 1.88 - 2.00 (1 H, m), 2.74 (1 H, dd,  $J=13.9, 10.0$  Hz), 2.85 (1 H, ddd,  $J=14.0, 10.1, 4.1$  Hz), 3.01 (1 H, ddd,  $J=9.6, 6.5, 2.9$  Hz), 3.13 (1 H, dt,  $J=13.7, 4.6$  Hz), 3.28 (1 H, ddd,  $J=14.0, 8.4, 5.4$  Hz), 3.67 - 3.81 (2 H, m), 7.70 (1 H, t,  $J=7.8$  Hz), 8.20 (1 H, d,  $J=7.8$  Hz), 8.33 (1 H, d,  $J=7.3$  Hz), 8.46 (1 H, d,  $J=6.3$  Hz), 8.71 (1 H, d,  $J=5.9$  Hz), 9.36 (1 H, s) ppm;  $^{13}\text{C}$  NMR (75 MHz, CHLOROFORM-*d*)  $\delta$  = 20.0, 31.2, 46.3, 47.9, 56.6, 57.8, 117.9, 126.1, 129.5, 131.9, 132.8, 133.5, 135.1, 145.3, 153.5 ppm.

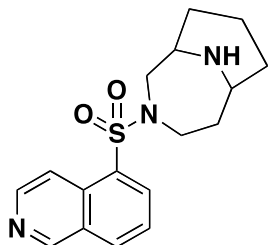

**3-(isoquinolin-5-ylsulfonyl)-3,10-diazabicyclo[4.3.1]decane (BRD3954).**  $^1\text{H}$  NMR (300 MHz, CHLOROFORM-*d*)  $\delta$  = 1.05 - 1.22 (4 H, m), 1.31 - 1.58 (3 H, m), 1.58 - 1.79 (2 H, m), 1.79 - 1.98 (2 H, m), 1.98 - 2.21 (2 H, m), 3.01 - 3.17 (1 H, m), 3.17 - 3.34 (3 H, m), 3.41 - 3.59 (2 H, m), 7.62 (1 H, t,  $J=7.7$  Hz), 8.12 (1 H, d,  $J=8.1$  Hz), 8.23 (1 H, dd,  $J=7.3, 1.1$  Hz), 8.43 (1 H, d,  $J=6.0$  Hz), 8.62 (1 H, d,  $J=6.2$  Hz), 9.27 (1 H, s) ppm;  $^{13}\text{C}$  NMR (75 MHz, CHLOROFORM-*d*)  $\delta$  = 15.4, 28.2, 31.0, 33.2, 47.0, 47.9, 49.9, 53.6, 117.6, 125.9, 129.2, 131.7, 132.5, 133.2, 134.7, 145.1, 153.2 ppm.

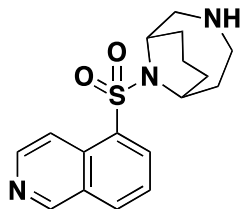

**10-(isoquinolin-5-ylsulfonyl)-3,10-diazabicyclo[4.3.1]decane (BRD2533).**  $^1\text{H}$  NMR (300 MHz, CHLOROFORM-*d*)  $\delta$  = 1.14 - 1.78 (6 H, m), 2.23 (2 H, m), 2.88 - 3.21 (4 H, m), 4.12 - 4.23 (1 H, m), 4.30 - 4.41 (1 H, m), 7.72 (1 H, t,  $J=7.7$  Hz), 8.18 - 8.27 (1 H, m), 8.39 (1 H, d,  $J=5.8$  Hz), 8.46 - 8.55 (1 H, m), 8.72 (1 H, d,  $J=6.0$  Hz), 9.38 (1 H, s) ppm.

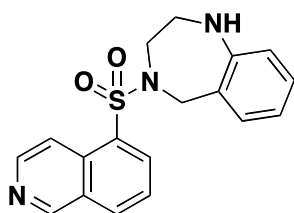

**4-(isoquinolin-5-ylsulfonyl)-2,3,4,5-tetrahydro-1H-benzo[e][1,4]diazepine (BRD0114).**  $^1\text{H}$  NMR (300 MHz, CHLOROFORM-*d*)  $\delta$  = 3.09 - 3.20 (2 H, m), 3.56 - 3.66 (2 H, m), 4.51 (2 H, s), 6.63 (1 H, d,  $J=7.5$  Hz), 6.86 (1 H, d,  $J=7.5$  Hz), 7.08 (1 H, d,  $J=1.5$  Hz), 7.12 - 7.20 (1 H, m), 7.65 (1 H, t,  $J=7.7$  Hz), 8.11 - 8.20 (1 H, m), 8.33 - 8.45 (2 H, m), 8.59 (1 H, d,  $J=6.0$  Hz), 9.30 (1 H, d,  $J=0.8$  Hz) ppm.

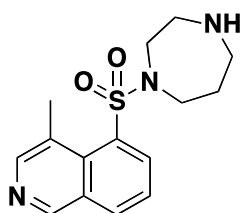

**5-(1,4-diazepan-1-ylsulfonyl)-4-methylisoquinoline (BRD3773).**  $^1\text{H}$  NMR (300 MHz, CHLOROFORM-*d*)  $\delta$  = 1.76 (1 H, br. s.), 1.89 (2 H, dq,  $J=6.3, 6.1$  Hz), 2.94 - 3.06 (7 H, m), 3.45 - 3.55 (2 H, m), 3.58 (2 H, t,  $J=6.2$  Hz), 7.52 (1 H, t,  $J=7.7$  Hz), 7.77 (1 H, d,  $J=7.3$  Hz), 8.07 (1 H, d,  $J=8.1$  Hz), 8.48 (1 H, s), 9.07 (1 H, s) ppm.

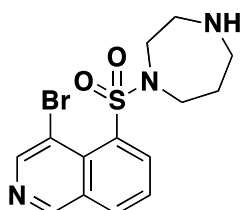

**5-(1,4-diazepan-1-ylsulfonyl)-4-bromoisoquinoline (BRD8880).**  $^1\text{H}$  NMR (300 MHz, CHLOROFORM- $d$ )  $\delta$  = 1.24 - 1.40 (10 H, m), 1.40 - 1.46 (3 H, m), 1.86 - 2.01 (2 H, m), 3.26 - 3.56 (9 H, m), 7.47 - 7.59 (1 H, m), 7.68 - 7.83 (1 H, m), 8.03 (1 H, d,  $J=8.1$  Hz), 8.86 (1 H, s), 9.05 - 9.10 (1 H, m) ppm.

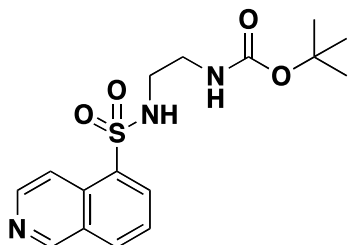

**tert-butyl 2-(isoquinoline-5-sulfonamido)ethylcarbamate (BRD4153).**  $^1\text{H}$  NMR (300 MHz, CHLOROFORM- $d$ )  $\delta$  = 1.33 - 1.43 (9 H, m), 2.97 - 3.11 (2 H, m), 3.13 - 3.26 (2 H, m), 4.70 - 4.84 (1 H, m), 5.66 - 5.80 (1 H, m), 7.67 - 7.76 (1 H, m), 8.22 (1 H, d,  $J=8.1$  Hz), 8.36 - 8.47 (2 H, m), 8.71 (1 H, d,  $J=6.2$  Hz), 9.37 (1 H, s) ppm.

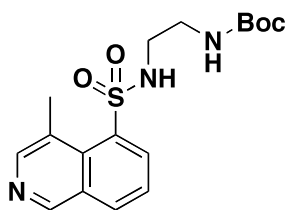

**tert-butyl 2-(4-methylisoquinoline-5-sulfonamido)ethylcarbamate (BRD9391).**  $^1\text{H}$  NMR (300 MHz, CHLOROFORM- $d$ )  $\delta$  = 1.29 - 1.43 (9 H, m), 1.71 - 1.93 (1 H, m), 3.00 (3 H, s), 3.17 - 3.39 (4 H, m), 4.97 - 5.10 (1 H, m), 5.98 - 6.21 (1 H, m), 7.50 (1 H, t,  $J=7.8$  Hz), 8.05 (1 H, d,  $J=8.1$  Hz), 8.30 (1 H, d,  $J=7.2$  Hz), 8.46 (1 H, s), 9.06 (1 H, s) ppm.

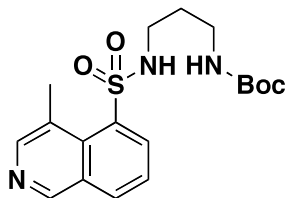

**tert-butyl 3-(4-methylisoquinoline-5-sulfonamido)propylcarbamate (BRD7177).**  $^1\text{H}$  NMR (500 MHz, CHLOROFORM- $d$ )  $\delta$  = 1.46 (9 H, s), 1.69 - 1.80 (2 H, m), 3.10 (3 H, s), 3.23 (2 H, q,  $J=5.9$  Hz), 3.34 (2 H, d,  $J=5.4$  Hz), 4.91 (1 H, t,  $J=5.9$  Hz), 6.55 (1 H, br. s.), 7.56 (1 H, t,  $J=7.8$  Hz), 8.12 (1 H, d,  $J=7.8$  Hz), 8.32 (1 H, d,  $J=7.3$  Hz), 8.54 (1 H, s), 9.13 (1 H, s) ppm.



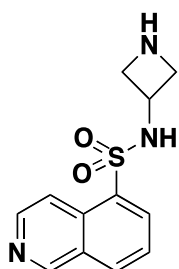

***N*-(azetidin-3-yl)isoquinoline-5-sulfonamide (BRD4958).**  $^1\text{H}$  NMR (500 MHz, CHLOROFORM-*d*)  $\delta$  = 2.36 (4 H, br. s.), 2.43 (7 H, br. s.), 2.49 (2 H, br. s.), 3.29 - 3.35 (2 H, m), 3.56 - 3.66 (2 H, m), 4.20 (1 H, t,  $J=7.1$  Hz), 7.71 - 7.76 (1 H, m), 8.25 (1 H, d,  $J=8.3$  Hz), 8.44 (2 H, dd,  $J=13.7, 6.8$  Hz), 8.74 (1 H, d,  $J=6.3$  Hz), 9.40 (1 H, s) ppm.

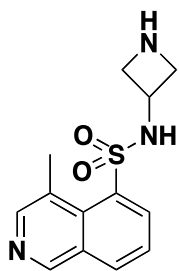

***N*-(azetidin-3-yl)-4-methylisoquinoline-5-sulfonamide (BRD3966).**  $^1\text{H}$  NMR (300 MHz, CHLOROFORM-*d*)  $\delta$  = 2.05 (7 H, s), 3.09 (3 H, s), 3.72 (2 H, dd,  $J=8.7, 7.0$  Hz), 3.86 - 4.01 (2 H, m), 4.33 (1 H, d,  $J=7.5$  Hz), 7.62 (1 H, t,  $J=7.7$  Hz), 8.17 (1 H, d,  $J=1.3$  Hz), 8.41 (1 H, dd,  $J=7.3, 1.3$  Hz), 8.57 (1 H, s), 9.17 (1 H, s) ppm.

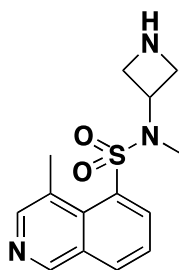

***N*-(azetidin-3-yl)-*N*,4-dimethylisoquinoline-5-sulfonamide (BRD9325).**  $^1\text{H}$  NMR (300 MHz, CHLOROFORM-*d*)  $\delta$  = 1.64 - 1.85 (2 H, m), 3.06 (3 H, s), 3.19 (3 H, s), 3.80 (2 H, t,  $J=8.6$  Hz), 3.99 (2 H, t,  $J=8.4$  Hz), 4.97 (1 H, t,  $J=7.8$  Hz), 7.60 (1 H, t,  $J=7.7$  Hz), 7.86 - 7.95 (1 H, m), 8.18 (1 H, d,  $J=8.1$  Hz), 8.56 (1 H, s), 9.16 (1 H, s) ppm;  $^{13}\text{C}$  NMR (75 MHz, CHLOROFORM-*d*)  $\delta$  = 21.5, 31.1, 52.0, 52.2, 124.7, 127.6, 130.4, 130.7, 132.4, 134.7, 136.1, 148.7, 152.0 ppm.

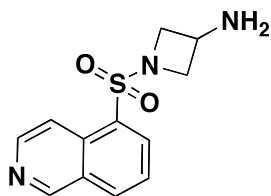

**1-(isoquinolin-5-ylsulfonyl)azetididin-3-amine (BRD5991).**  $^1\text{H}$  NMR (300 MHz, CHLOROFORM-*d*)  $\delta$  = 1.09 (1 H, t,  $J=7.3$  Hz), 1.26 - 1.66 (2 H, m), 3.57 - 3.70 (2 H, m), 3.70 - 3.83 (1 H, m), 3.96 - 4.10 (2 H, m), 7.74 (1 H, t,  $J=7.8$  Hz), 8.26 (1 H, d,  $J=8.3$  Hz), 8.38 - 8.51 (2 H, m), 8.72 (1 H, d,  $J=6.0$  Hz), 9.37 (1 H, s) ppm.

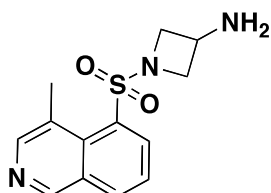

**1-(4-methylisoquinolin-5-ylsulfonyl)azetididin-3-amine (BRD5337).**  $^1\text{H}$  NMR (500 MHz, CHLOROFORM-*d*)  $\delta$  = 1.62 (3 H, br. s.), 3.10 (3 H, s), 3.82 (2 H, t,  $J=7.1$  Hz), 3.86 - 3.93 (1 H, m), 4.08 (2 H, t,  $J=7.3$  Hz), 7.65 (1 H, t,  $J=7.8$  Hz), 8.21 (1 H, d,  $J=8.3$  Hz), 8.56 (1 H, s), 8.71 (1 H, d,  $J=7.3$  Hz), 9.16 (1 H, s) ppm.

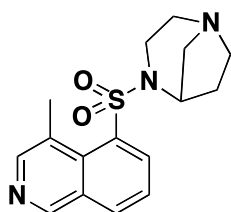

**5-(1,4-diazabicyclo[3.2.1]octan-4-ylsulfonyl)-4-methylisoquinoline (BRD1742).**  $^1\text{H}$  NMR (300 MHz, CHLOROFORM-*d*)  $\delta$  = 1.13 - 1.31 (1 H, m), 1.95 - 2.12 (2 H, m), 2.17 - 2.36 (1 H, m), 2.54 - 2.66 (1 H, m), 2.74 - 2.83 (1 H, m), 2.94 - 3.19 (7 H, m), 3.19 - 3.41 (2 H, m), 4.26 - 4.38 (1 H, m), 7.66 (1 H, t,  $J=7.9$  Hz), 8.21 (1 H, d,  $J=8.1$  Hz), 8.46 - 8.60 (2 H, m), 9.17 (1 H, s) ppm;  $^{13}\text{C}$  NMR (75 MHz, CHLOROFORM-*d*)  $\delta$  = 21.4, 31.0, 39.5, 50.6, 52.6, 54.9, 59.9, 124.8, 127.5, 130.3, 132.5, 134.8, 134.9, 135.4, 148.8, 152.1 ppm.

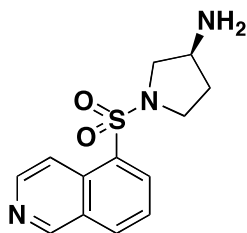

**(S)-1-(isoquinolin-5-ylsulfonyl)pyrrolidin-3-amine (BRD3590).**  $^1\text{H}$  NMR (300 MHz, CHLOROFORM- $d$ )  $\delta$  = 1.39 - 1.77 (2 H, m), 2.00 - 2.16 (1 H, m), 2.99 - 3.14 (1 H, m), 3.43 (1 H, ddd,  $J$ =9.6, 8.1, 5.7 Hz), 3.48 - 3.64 (3 H, m), 7.67 - 7.77 (1 H, m), 8.23 (1 H, d,  $J$ =8.3 Hz), 8.46 (1 H, dd,  $J$ =7.3, 1.3 Hz), 8.60 (1 H, d,  $J$ =6.2 Hz), 8.71 (1 H, d,  $J$ =6.2 Hz), 9.37 (1 H, d,  $J$ =0.9 Hz) ppm.

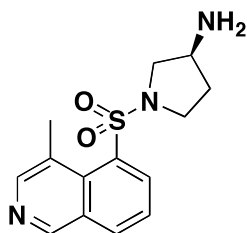

**(S)-1-(4-methylisoquinolin-5-ylsulfonyl)pyrrolidin-3-amine (BRD3752).**  $^1\text{H}$  NMR (300 MHz, CHLOROFORM- $d$ )  $\delta$  = 1.42 (2 H, br. s.), 1.84 - 1.96 (1 H, m), 2.19 - 2.34 (1 H, m), 3.05 - 3.13 (3 H, m), 3.23 - 3.35 (1 H, m), 3.62 - 3.79 (3 H, m), 3.84 - 3.94 (1 H, m), 7.62 (1 H, t,  $J$ =7.8 Hz), 8.16 (1 H, dd,  $J$ =8.2, 1.2 Hz), 8.49 (1 H, dd,  $J$ =7.5, 1.3 Hz), 8.56 (1 H, d,  $J$ =0.8 Hz), 9.15 (1 H, s) ppm;  $^{13}\text{C}$  NMR (150 MHz, CHLOROFORM- $d$ )  $\delta$  = 21.6, 34.8, 46.8, 51.6, 56.5, 125.0, 127.7, 130.4, 131.2, 132.3, 134.3, 136.3, 148.5, 151.9 ppm.

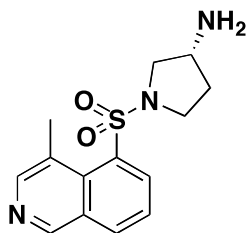

**(R)-1-(4-methylisoquinolin-5-ylsulfonyl)pyrrolidin-3-amine (BRD0828).**  $^1\text{H}$  NMR (500 MHz, CHLOROFORM- $d$ )  $\delta$  = 1.89 (1 H, ddd,  $J$ =12.6, 3.8, 3.7 Hz), 2.23 - 2.32 (1 H, m), 3.10 (3 H, s), 3.29 (1 H, dd,  $J$ =10.3, 3.4 Hz), 3.66 - 3.77 (3 H, m), 3.87 - 3.93 (1 H, m), 7.62 (1 H, t,  $J$ =7.8 Hz), 8.16 (1 H, d,  $J$ =8.3 Hz), 8.48 (1 H, d,  $J$ =7.3 Hz), 8.55 (1 H, s), 9.15 (1 H, s).

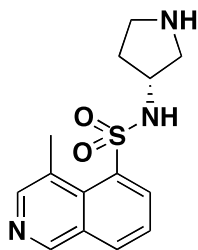

**(R)-4-methyl-N-(pyrrolidin-3-yl)isoquinoline-5-sulfonamide (BRD3695).**  $^1\text{H}$  NMR (500 MHz, CHLOROFORM-*d*)  $\delta$  = 1.89 - 2.00 (1 H, m), 2.12 - 2.25 (1 H, m), 2.96 (1 H, dd,  $J=15.9, 9.5$  Hz), 3.07 (3 H, s), 3.09 - 3.25 (2 H, m), 3.87 - 4.01 (1 H, m), 5.49 (1 H, br. s.), 7.60 (1 H, t,  $J=7.8$  Hz), 8.06 - 8.19 (1 H, m), 8.44 - 8.52 (1 H, m), 8.54 (1 H, s), 9.06 - 9.18 (1 H, m) ppm;  $^{13}\text{C}$  NMR (150 MHz, CHLOROFORM-*d*)  $\delta$  = 22.0, 30.0, 33.4, 45.0, 53.7, 54.7, 125.1, 127.6, 130.4, 132.5, 132.5, 134.8, 137.1, 148.7, 152.2 ppm.

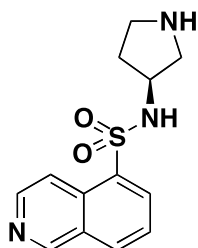

**(S)-N-(pyrrolidin-3-yl)isoquinoline-5-sulfonamide (BRD8943).**  $^1\text{H}$  NMR (300 MHz, CHLOROFORM-*d*)  $\delta$  = 1.44 - 1.58 (1 H, m), 1.79 - 1.97 (1 H, m), 2.63 - 2.74 (1 H, m), 2.76 - 3.03 (3 H, m), 3.61 - 3.95 (2 H, m), 7.67 - 7.78 (1 H, m), 8.24 (1 H, d,  $J=8.3$  Hz), 8.43 (1 H, d,  $J=6.2$  Hz), 8.49 (1 H, dd,  $J=7.3, 1.1$  Hz), 8.69 (1 H, d,  $J=6.0$  Hz), 9.39 (1 H, s) ppm.

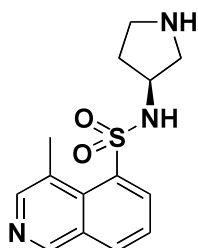

**(S)-4-methyl-N-(pyrrolidin-3-yl)isoquinoline-5-sulfonamide (BRD9573).**  $^1\text{H}$  NMR (500 MHz, CHLOROFORM-*d*)  $\delta$  = 1.85 - 1.96 (1 H, m), 2.19 (1 H, td,  $J=14.0, 7.6$  Hz), 2.92 - 3.02 (1 H, m), 3.02 - 3.22 (6 H, m), 3.93 - 4.02 (1 H, m), 7.64 (1 H, t,  $J=7.8$  Hz), 8.18 (1 H, d,  $J=7.8$  Hz), 8.50 - 8.60 (2 H, m), 9.17 (1 H, s) ppm.

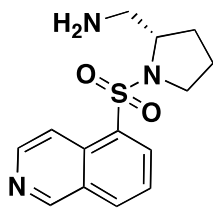

**(S)-(1-(isoquinolin-5-ylsulfonyl)pyrrolidin-2-yl)methanamine (BRD2246).**  $^1\text{H}$  NMR (300 MHz, CHLOROFORM-*d*)  $\delta$  = 1.58 - 1.86 (4 H, m), 2.75 - 2.88 (2 H, m), 3.40 (2 H, t,  $J=6.6$  Hz), 3.79 - 3.93 (1 H, m,  $J=7.3, 2.4, 1.3, 1.3$  Hz), 7.74 (1 H, t,  $J=7.8$  Hz), 8.24 (1 H, d,  $J=8.3$  Hz), 8.46 (1 H, dd,  $J=7.4, 1.2$  Hz), 8.63 - 8.75 (2 H, m), 9.37 (1 H, s) ppm;  $^{13}\text{C}$  NMR (75 MHz, CHLOROFORM-*d*)  $\delta$  = 24.4, 29.2, 46.1, 49.1, 62.3, 117.7, 126.0, 129.1, 132.2, 133.6, 133.7, 133.7, 145.2, 153.3 ppm.

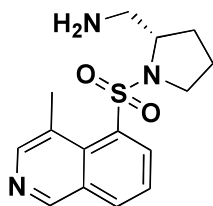

**(S)-(1-(4-methylisoquinolin-5-ylsulfonyl)pyrrolidin-2-yl)methanamine (BRD7471).**  $^1\text{H}$  NMR (500 MHz, CHLOROFORM-*d*)  $\delta$  = 1.26 (2 H, d,  $J=2.9$  Hz), 1.95 - 2.18 (4 H, m), 2.20 - 2.33 (1 H, m), 2.79 (1 H, dd,  $J=12.9, 7.6$  Hz), 2.96 (1 H, dd,  $J=13.2, 4.4$  Hz), 3.10 (3 H, s), 3.47 - 3.55 (1 H, m), 3.60 - 3.67 (1 H, m), 4.03 - 4.10 (1 H, m,  $J=7.4, 7.4, 3.9, 3.8$  Hz), 7.62 (1 H, t,  $J=7.8$  Hz), 8.17 (1 H, d,  $J=8.3$  Hz), 8.22 (1 H, d,  $J=7.3$  Hz), 8.56 (1 H, s), 9.15 (1 H, s) ppm;  $^{13}\text{C}$  NMR (150 MHz, CHLOROFORM-*d*)  $\delta$  = 21.7, 24.4, 29.3, 45.97, 49.6, 63.1, 124.7, 127.7, 130.3, 130.7, 132.3, 134.5, 136.3, 148.6, 151.9 ppm.

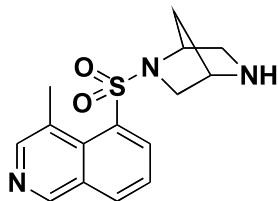

**5-((1S,4S)-2,5-diazabicyclo[2.2.1]heptan-2-ylsulfonyl)-4-methylisoquinoline (BRD4942).**  $^1\text{H}$  NMR (300 MHz, CHLOROFORM-*d*)  $\delta$  = 1.89 (3 H, d,  $J=10.9$  Hz), 2.00 - 2.10 (1 H, m), 2.98 - 3.14 (4 H, m), 3.29 - 3.45 (2 H, m), 3.51 (1 H, dd,  $J=9.1, 2.0$  Hz), 3.89 (1 H, s), 4.45 (1 H, s), 7.64 (1 H, t,  $J=7.8$  Hz), 8.13 - 8.23 (1 H, m), 8.46 - 8.60 (2 H, m), 9.16 (1 H, s) ppm.

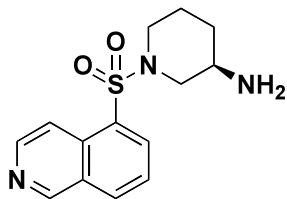

**(R)-1-(isoquinolin-5-ylsulfonyl)piperidin-3-amine (BRD0841).**  $^1\text{H}$  NMR (300 MHz, CHLOROFORM-*d*)  $\delta$  = 1.01 - 1.18 (1 H, m), 1.18 - 1.44 (2 H, m), 1.60 (1 H, dd,  $J=10.2, 3.6$  Hz), 1.71 - 1.88 (2 H, m), 2.42 (1 H, dd,  $J=11.6, 8.9$  Hz), 2.61 - 2.74 (1 H, m), 2.84 - 2.97 (1 H, m), 3.49 - 3.72 (2 H, m), 7.72 (1 H, t,  $J=7.8$  Hz), 8.22 (1 H, d,  $J=8.1$  Hz), 8.38 (1 H, dd,  $J=7.3, 1.3$  Hz), 8.51 (1 H, d,  $J=6.2$  Hz), 8.68 (1 H, d,  $J=6.2$  Hz), 9.35 (1 H, s) ppm.

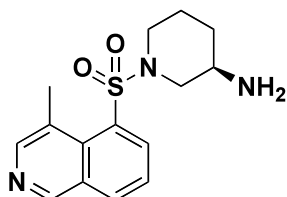

**(R)-1-(4-methylisoquinolin-5-ylsulfonyl)piperidin-3-amine (BRD3376).**  $^1\text{H}$  NMR (300 MHz, CHLOROFORM-*d*)  $\delta$  = 1.27 - 1.48 (3 H, m), 1.65 - 1.83 (1 H, m), 1.83 - 1.96 (1 H, m), 1.98 - 2.11 (1 H, m), 2.84 (1 H, dd,  $J=12.2, 8.9$  Hz), 2.99 - 3.17 (5 H, m), 3.68 - 3.86 (2 H, m), 7.62 (1 H, t,  $J=7.7$  Hz), 8.09 (1 H, dd,  $J=7.5, 1.1$  Hz), 8.17 (1 H, dd,  $J=8.1, 1.3$  Hz), 8.56 (1 H, s), 9.15 (1 H, s) ppm;  $^{13}\text{C}$  NMR (CHLOROFORM-*d*)  $\delta$  = 21.4, 24.0, 33.4, 46.5, 47.7, 54.2, 124.8, 127.6, 130.3, 131.4, 132.4, 134.7, 136.5, 148.7, 152.0 ppm.

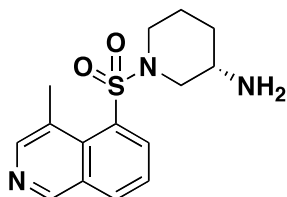

**(S)-1-(4-methylisoquinolin-5-ylsulfonyl)piperidin-3-amine (BRD3436).**  $^1\text{H}$  NMR (300 MHz, CHLOROFORM-*d*)  $\delta$  = 1.05 - 1.19 (2 H, m), 1.21 - 1.31 (1 H, m), 1.39 - 1.66 (7 H, m), 1.71 - 1.91 (2 H, m), 2.37 - 2.48 (1 H, m), 2.62 - 2.74 (1 H, m), 2.86 - 2.97 (1 H, m), 3.49 - 3.73 (3 H, m), 7.66 - 7.78 (1 H, m), 8.23 (1 H, d,  $J=8.3$  Hz), 8.36 - 8.43 (1 H, m), 8.51 (1 H, d,  $J=6.2$  Hz), 8.69 (1 H, d,  $J=6.2$  Hz), 9.36 (1 H, s) ppm.

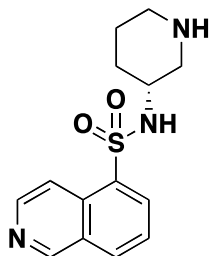

**(R)-N-(piperidin-3-yl)isoquinoline-5-sulfonamide (BRD0561).**  $^1\text{H}$  NMR (300 MHz, CHLOROFORM-*d*)  $\delta$  = 1.31 - 1.67 (5 H, m), 1.98 - 2.07 (1 H, m), 2.45 (1 H, dd,  $J$ =11.6, 5.7 Hz), 2.59 - 2.79 (3 H, m), 3.31 - 3.42 (1 H, m), 7.72 (1 H, t,  $J$ =7.8 Hz), 8.23 (1 H, d,  $J$ =7.9 Hz), 8.47 (2 H, dd,  $J$ =15.2, 6.7 Hz), 8.74 (1 H, d,  $J$ =6.0 Hz), 9.39 (1 H, s) ppm.

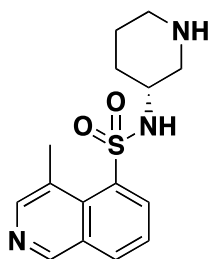

**(R)-4-methyl-N-(piperidin-3-yl)isoquinoline-5-sulfonamide (BRD4209).**  $^1\text{H}$  NMR (300 MHz, CHLOROFORM-*d*)  $\delta$  = 1.51 (2 H, br. s.), 1.75 (4 H, br. s.), 2.69 - 2.87 (4 H, m), 2.92 - 3.02 (1 H, m), 3.05 - 3.16 (3 H, m), 3.50 (1 H, br. s.), 7.62 (1 H, t,  $J$ =7.8 Hz), 8.16 (1 H, dd,  $J$ =8.1, 1.3 Hz), 8.56 (1 H, d,  $J$ =0.8 Hz), 8.62 (1 H, dd,  $J$ =7.5, 1.3 Hz), 9.16 (1 H, s) ppm.

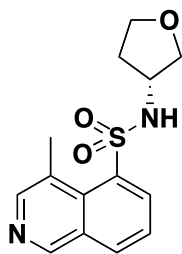

**(R)-4-methyl-N-(tetrahydrofuran-3-yl)isoquinoline-5-sulfonamide (BRD4357).**  $^1\text{H}$  NMR (300 MHz, CHLOROFORM-*d*)  $\delta$  = 1.95 - 2.10 (1 H, m), 2.21 - 2.38 (1 H, m), 3.8 (3 H, s), 3.73 - 3.88 (3 H, m), 3.93 - 4.16 (2 H, m), 7.63 (1 H, t,  $J$ =7.8 Hz), 8.12 - 8.24 (1 H, m), 8.47 - 8.60 (2 H, m), 9.16 (1 H, s) ppm.

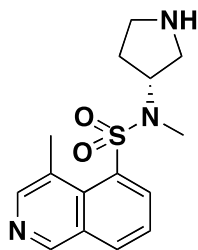

**(R)-N,4-dimethyl-N-(pyrrolidin-3-yl)isoquinoline-5-sulfonamide (BRD4618).**  $^1\text{H}$  NMR (300 MHz, CHLOROFORM- $d$ )  $\delta$  = 1.59 - 1.73 (7 H, m), 1.95 - 2.21 (2 H, m), 2.89 - 2.99 (2 H, m), 3.01 (3 H, s), 3.02 - 3.16 (5 H, m), 3.24 (1 H, dd,  $J=11.4, 8.2$  Hz), 4.46 - 4.60 (1 H, m), 7.62 (1 H, t,  $J=7.9$  Hz), 8.10 - 8.21 (2 H, m), 8.56 (1 H, s), 9.16 (1 H, s) ppm.

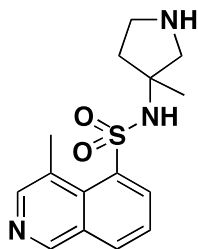

**4-methyl-N-(3-methylpyrrolidin-3-yl)isoquinoline-5-sulfonamide (BRD4889).**  $^1\text{H}$  NMR (300 MHz, CHLOROFORM- $d$ )  $\delta$  = 1.26 (1 H, t,  $J=7.1$  Hz), 1.43 (3 H, s), 1.75 - 1.19 (1 H, m), 2.34 (2 H, s), 2.83 - 2.90 (1 H, m), 3.09 (3 H, s), 3.36 - 3.39 (1 H, m), 7.65 (1 H, d,  $J=8.3$  Hz), 8.17 (1 H, dd,  $J=8.1, 1.5$  Hz), 8.56 (1 H, s), 8.67 - 8.72 (1 H, m), 9.16 (1 H, s) ppm.

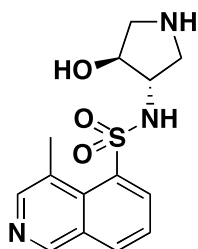

**N-((3S,4S)-4-hydroxypyrrolidin-3-yl)-4-methylisoquinoline-5-sulfonamide (BRD0227).**  $^1\text{H}$  NMR (300 MHz, MeOD)  $\delta$  = 2.74 - 2.85 (1 H, m), 2.88 - 2.98 (1 H, m), 3.05 (3 H, s), 3.11 - 3.19 (1 H, m), 3.31 - 3.39 (1 H, m), 3.60 (1 H, td,  $J=2.7, 0.9$  Hz), 4.26 - 4.37 (1 H, m), 7.75 (1 H, t,  $J=7.7$  Hz), 8.29 - 8.36 (1 H, m), 8.43 (1 H, s), 8.53 - 8.63 (1 H, m), 9.15 (1 H, s) ppm.



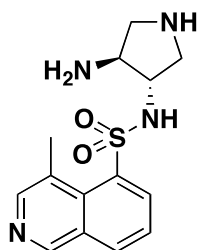

***N*-((3*S*,4*S*)-4-aminopyrrolidin-3-yl)-4-methylisoquinoline-5-sulfonamide (BRD6696).** <sup>1</sup>H NMR (300 MHz, MeOD)  $\delta$  = 1.76 - 1.91 (1 H, m), 2.55 - 2.67 (1 H, m), 2.84 - 2.95 (1 H, m), 3.00 - 3.08 (3 H, m), 3.14 - 3.24 (1 H, m), 3.24 - 3.32 (6 H, m), 7.77 (1 H, t,  $J$ =7.8 Hz), 8.33 (1 H, d,  $J$ =8.5 Hz), 8.45 (1 H, s), 8.55 (1 H, d,  $J$ =7.7 Hz), 9.16 (1 H, s) ppm.

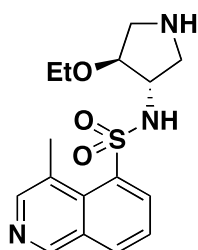

***N*-((3*S*,4*S*)-4-ethoxypyrrolidin-3-yl)-4-methylisoquinoline-5-sulfonamide (BRD1230).** <sup>1</sup>H NMR (300 MHz, MeOD)  $\delta$  = 1.07 (3 H, t,  $J$ =7.0 Hz), 2.81 - 2.91 (2 H, m), 2.98 - 3.16 (4 H, m), 3.42 (2 H, q,  $J$ =7.2 Hz), 3.64 - 3.73 (1 H, m), 4.01 (1 H, ddd,  $J$ =2.5, 1.2, 1.0 Hz), 7.74 (1 H, t,  $J$ =7.7 Hz), 8.33 (1 H, d,  $J$ =8.1 Hz), 8.44 (1 H, s), 8.58 (1 H, d,  $J$ =7.5 Hz), 9.16 (1 H, s) ppm.

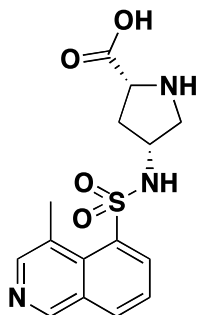

**(2*R*,4*R*)-4-(4-methylisoquinoline-5-sulfonamido)pyrrolidine-2-carboxylic acid (BRD0035).** <sup>1</sup>H NMR (500 MHz, METHANOL-*d*<sub>4</sub>)  $\delta$  = 1.24 - 1.34 (4 H, m), 1.70 (2 H, dd,  $J$ =6.3, 3.4 Hz), 1.89 - 1.96 (2 H, m), 2.07 (2 H, d,  $J$ =14.2 Hz), 3.08 (3 H, s), 3.17 - 3.21 (1 H, m), 3.35 - 3.39 (2 H, m), 3.47 (1 H, d,  $J$ =2.0 Hz), 3.80 (1 H, s), 4.01 (1 H, s), 7.82 (1 H, t,  $J$ =7.8 Hz), 8.38 (1 H, d,  $J$ =8.3 Hz), 8.49 (1 H, s), 8.55 (1 H, d,  $J$ =7.3 Hz), 9.21 (1 H, s) ppm.

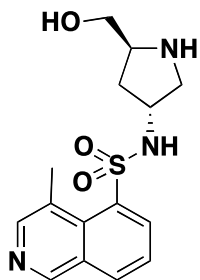

***N*-((3*R*,5*S*)-5-(hydroxymethyl)pyrrolidin-3-yl)-4-methylisoquinoline-5-sulfonamide (BRD4980).**  $^1\text{H}$  NMR (500 MHz, CHLOROFORM-*d*)  $\delta$  = 1.94 (2 H, t,  $J$ =6.1 Hz), 2.05 (1 H, s), 3.04 (1 H, dd,  $J$ =11.2, 3.9 Hz), 3.10 (3 H, s), 3.16 - 3.24 (1 H, m), 3.36 (1 H, d,  $J$ =4.9 Hz), 3.52 - 3.59 (2 H, m), 3.97 (1 H, s), 7.66 (1 H, t,  $J$ =7.6 Hz), 8.21 (1 H, d,  $J$ =7.8 Hz), 8.53 (1 H, d,  $J$ =8.3 Hz), 8.58 (1 H, s), 9.19 (1 H, s) ppm.

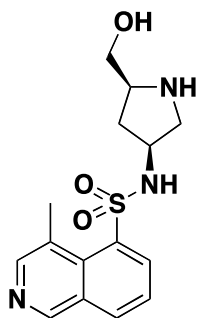

***N*-((3*S*,5*S*)-5-(hydroxymethyl)pyrrolidin-3-yl)-4-methylisoquinoline-5-sulfonamide (BRD6875).**  $^1\text{H}$  NMR (300 MHz, MeOD)  $\delta$  = 1.61 (1 H, s), 2.29 (1 H, s), 2.88 - 2.96 (1 H, m), 3.05 (3 H, s), 3.06 - 3.14 (1 H, m), 3.15 - 3.24 (3 H, m), 3.57 (2 H, d,  $J$ =4.7 Hz), 3.83 (1 H, s), 7.76 (1 H, t,  $J$ =7.8 Hz), 8.33 (1 H, d,  $J$ =8.1 Hz), 8.44 (1 H, s), 8.51 (1 H, d,  $J$ =7.5 Hz), 9.16 (1 H, s) ppm.

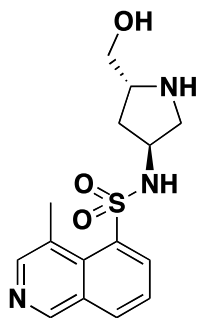

***N*-((3*S*,5*R*)-5-(hydroxymethyl)pyrrolidin-3-yl)-4-methylisoquinoline-5-sulfonamide (BRD8313).**  $^1\text{H}$  NMR (500 MHz, CHLOROFORM-*d*)  $\delta$  = 1.13 - 1.19 (2 H, m), 1.24 - 1.36 (2 H, m), 1.90 - 1.97 (2 H, m), 3.00 - 3.06 (1 H, m), 3.08 - 3.13 (2 H, m), 3.21 (1 H, dd,  $J$ =10.3, 4.9 Hz), 3.32 - 3.41 (1 H, m), 3.53 - 3.60 (2 H, m), 3.98 (1 H, dd,  $J$ =6.6, 4.6

Hz), 7.62 - 7.69 (1 H, m), 8.21 (1 H, d, J=7.3 Hz), 8.53 (1 H, d, J=8.3 Hz), 8.56 - 8.60 (1 H, m), 9.15 - 9.21 (1 H, m) ppm.

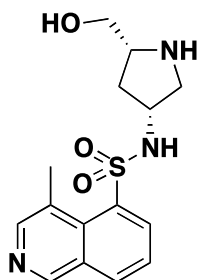

***N*-((3*R*,5*R*)-5-(hydroxymethyl)pyrrolidin-3-yl)-4-methylisoquinoline-5-sulfonamide (BRD1045).** <sup>1</sup>H NMR (500 MHz, CHLOROFORM-*d*)  $\delta$  = 1.81 (2 H, br. s.), 2.32 (1 H, ddd, J=13.8, 9.6, 7.3 Hz), 3.06 (1 H, dd, J=11.2, 4.9 Hz), 3.09 (3 H, s), 3.17 (1 H, d, J=10.7 Hz), 3.43 - 3.49 (1 H, m), 3.61 (1 H, dd, J=10.7, 3.9 Hz), 3.77 (1 H, dd, J=11.0, 2.7 Hz), 3.90 - 3.97 (1 H, m), 7.63 (1 H, t, J=7.8 Hz), 8.16 (1 H, d, J=8.3 Hz), 8.53 - 8.57 (2 H, m), 9.15 (1 H, s) ppm.

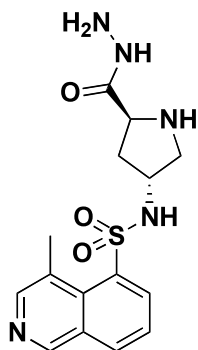

***N*-((3*R*,5*S*)-5-(hydrazinecarbonyl)pyrrolidin-3-yl)-4-methylisoquinoline-5-sulfonamide (BRD7777).** <sup>1</sup>H NMR (500 MHz, CHLOROFORM-*d*)  $\delta$  = 1.14 (2 H, t, J=7.3 Hz), 1.20 (2 H, t, J=6.8 Hz), 2.10 (2 H, s), 2.24 - 2.33 (2 H, m), 3.06 - 3.13 (4 H, m), 3.32 (2 H, d, J=6.8 Hz), 3.40 (1 H, d, J=6.8 Hz), 3.78 - 3.83 (1 H, m), 3.93 (1 H, d, J=5.4 Hz), 4.00 (1 H, d, J=6.3 Hz), 7.67 (1 H, t, J=7.6 Hz), 8.22 (1 H, d, J=7.3 Hz), 8.46 - 8.50 (1 H, m), 8.58 (1 H, s), 9.19 (1 H, s) ppm.

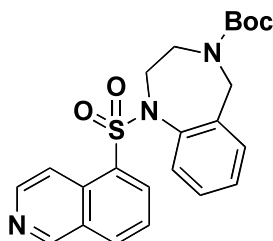

**tert-butyl 1-(isoquinolin-5-ylsulfonyl)-2,3-dihydro-1H-benzo[e][1,4]diazepine-4(5H)-carboxylate (BRD0119).**  $^1\text{H}$  NMR (300 MHz, CHLOROFORM-d)  $\delta$  = 1.31 - 1.37 (9 H, m), 3.48 - 3.77 (3 H, m), 3.85 - 4.13 (3 H, m), 6.92 - 7.02 (1 H, m), 7.08 - 7.25 (3 H, m), 7.61 - 7.74 (1 H, m), 8.08 - 8.17 (1 H, m), 8.20 - 8.28 (1 H, m), 8.31 - 8.41 (1 H, m), 8.56 (1 H, ddd, J=4.8, 2.1, 1.0 Hz), 9.32 - 9.42 (1 H, br.s.) ppm.

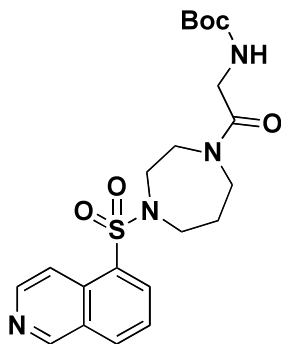

**tert-butyl 2-(4-(isoquinolin-5-ylsulfonyl)-1,4-diazepan-1-yl)-2-oxoethylcarbamate (BRD9370).**  $^1\text{H}$  NMR (300 MHz, CHLOROFORM-d)  $\delta$  = 1.23 (1 H, t, J=7.2 Hz), 1.31 - 1.44 (9 H, s), 1.92 - 2.00 (2 H, m), 2.02 (1 H, s), 3.31 - 3.60 (6 H, m), 3.61 - 3.77 (2 H, m), 3.88 (2 H, dd, J=9.3, 4.4 Hz), 5.45 (1 H, d, J=15.3 Hz), 7.60 - 7.72 (1 H, m), 8.19 (1 H, d, J=8.1 Hz), 8.26 - 8.37 (2 H, m), 8.61 - 8.71 (1 H, m), 9.33 (1 H, s) ppm.

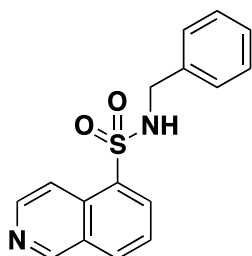

**N-benzylisoquinoline-5-sulfonamide (BRD2850).**  $^1\text{H}$  NMR (300 MHz, CHLOROFORM-d)  $\delta$  = 4.05 - 4.20 (2 H, m), 5.40 - 5.62 (1 H, m), 6.94 - 7.08 (2 H, m), 7.08 - 7.20 (3 H, m), 7.67 (1 H, t, J=7.8 Hz), 8.18 (1 H, d, J=8.3 Hz), 8.35 - 8.48 (2 H, m), 8.57 - 8.71 (1 H, m), 9.25 - 9.38 (1 H, br.s.) ppm.

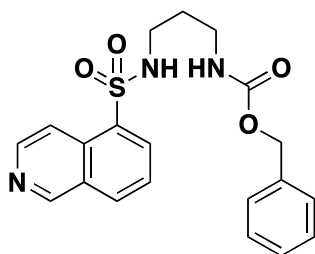

**benzyl 3-(isoquinoline-5-sulfonamido)propylcarbamate (BRD0886).**  $^1\text{H}$  NMR (300 MHz, MeOD)  $\delta$  = 2.86 (2 H, t,  $J=7.0$  Hz), 3.01 (2 H, t,  $J=6.7$  Hz), 4.94 - 4.98 (2 H, m), 7.21 - 7.32 (5 H, m), 7.72 - 7.81 (1 H, m), 8.31 - 8.46 (2 H, m), 8.53 (1 H, d,  $J=6.6$  Hz), 8.57 - 8.63 (1 H, m), 9.35 (1 H, s) ppm.

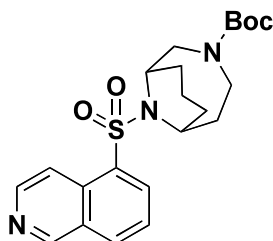

**tert-butyl 10-(isoquinolin-5-ylsulfonyl)-3,10-diazabicyclo[4.3.1]decane-3-carboxylate (BRD4468).**  $^1\text{H}$  NMR (300 MHz, CHLOROFORM- $d$ )  $\delta$  = 1.22 - 1.38 (2 H, m), 1.38 - 1.52 (9 H, m), 1.64 - 1.84 (3 H, m), 2.13 - 2.28 (1 H, m), 3.09 - 3.28 (2 H, m), 3.87 - 4.12 (2 H, m), 4.17 - 4.41 (2 H, m), 7.71 (1 H, t,  $J=7.7$  Hz), 8.22 (1 H, d,  $J=8.3$  Hz), 8.35 (3 H, d,  $J=6.4$  Hz), 8.48 (1 H, d,  $J=7.3$  Hz), 8.72 (1 H, dd,  $J=6.2, 2.3$  Hz), 9.38 (1 H, s) ppm;  $^{13}\text{C}$  NMR (75 MHz, CHLOROFORM- $d$ )  $\delta$  = 14.8, 15.1, 28.3, 28.5, 28.5, 31.1, 31.3, 32.3, 33.3, 46.1, 46.3, 49.2, 49.3, 52.5, 52.6, 53.0, 54.6, 79.8, 117.4, 125.9, 129.2, 131.2, 133.3, 133.6, 135.2, 145.2, 153.5, 154.4, 155.1 ppm.

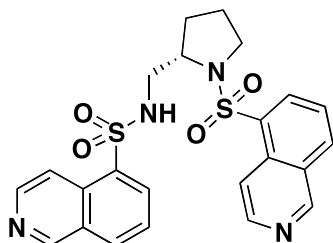

**(S)-N-((1-(isoquinolin-5-ylsulfonyl)pyrrolidin-2-yl)methyl)isoquinoline-5-sulfonamide (BRD3078).**  $^1\text{H}$  NMR (300 MHz, CHLOROFORM- $d$ )  $\delta$  = 1.45 - 1.75 (4 H, m), 2.98 - 3.09 (2 H, m), 3.14 - 3.33 (2 H, m), 3.64 - 3.78 (1 H, m), 5.52 (1 H, s), 7.04 - 7.15 (2 H, m), 7.65 (2 H, ddd,  $J=10.5, 7.9, 7.6$  Hz), 8.11 - 8.21 (2 H, m), 8.26 (1 H, dd,  $J=7.3, 1.1$  Hz), 8.32 - 8.40 (2 H, m), 8.50 (1 H, d,  $J=6.2$  Hz), 8.56 - 8.61 (1 H, m), 8.68 (1 H, d,  $J=6.2$  Hz), 9.28 (1 H, s), 9.33 (1 H, s) ppm.

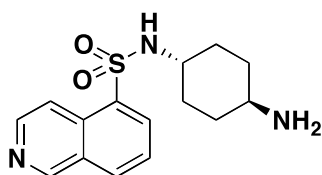

***N*-((1*r*,4*r*)-4-aminocyclohexyl)isoquinoline-5-sulfonamide (BRD6645).** <sup>1</sup>H NMR (300 MHz, CHLOROFORM-*d*)  $\delta$  = 0.96 - 1.26 (5 H, m), 1.66 - 1.81 (4 H, m), 2.50 - 2.62 (1 H, m), 3.12 (1 H, dddd, *J*=8.0, 5.4, 2.2, 1.5 Hz), 4.57 - 4.71 (1 H, m), 7.74 (1 H, t, *J*=7.8 Hz), 8.24 (1 H, d, *J*=8.1 Hz), 8.39 (1 H, d, *J*=6.2 Hz), 8.50 (1 H, d, *J*=7.3 Hz), 8.73 (1 H, d, *J*=6.2 Hz), 9.40 (1 H, s) ppm.

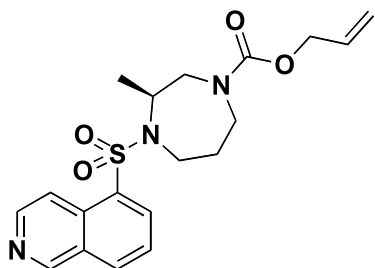

**(*S*)-allyl 4-(isoquinolin-5-ylsulfonyl)-3-methyl-1,4-diazepane-1-carboxylate (BRD9304).** <sup>1</sup>H NMR (300 MHz, CHLOROFORM-*d*)  $\delta$  = 0.71 - 0.87 (3 H, m), 1.07 - 1.23 (1 H, m), 1.45 - 1.75 (2 H, m), 2.91 - 3.16 (3 H, m), 3.55 - 3.81 (2 H, m), 3.81 - 3.96 (1 H, m), 4.17 - 4.38 (2 H, m), 4.38 - 4.60 (1 H, m), 5.03 - 5.29 (2 H, m), 5.68 - 5.96 (1 H, m), 7.62 (1 H, t, *J*=7.8 Hz), 8.13 (1 H, d, *J*=8.5 Hz), 8.20 - 8.28 (1 H, m), 8.37 (1 H, dd, *J*=13.6, 7.3 Hz), 8.61 (1 H, t, *J*=5.3 Hz), 9.27 (1 H, s) ppm; <sup>13</sup>C NMR (75 MHz, CHLOROFORM-*d*)  $\delta$  = 16.5, 16.6, 28.7, 29.2, 41.1, 47.7, 48.0, 51.6, 51.9, 53.3, 53.5, 53.6, 66.1, 66.2, 117.3, 117.5, 117.6, 125.9, 129.0, 129.1, 131.4, 131.5, 132.9, 133.0, 133.6, 133.6, 133.7, 134.0, 135.16, 145.2, 153.2, 153.3, 155.1, 155.3 ppm.

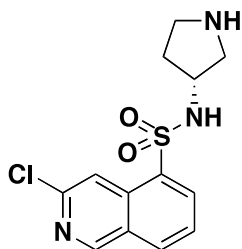

**(*R*)-3-chloro-*N*-(pyrrolidin-3-yl)isoquinoline-5-sulfonamide (BRD9082).** <sup>1</sup>H NMR (300 MHz, CHLOROFORM-*d*)  $\delta$  = 1.45 - 1.63 (1 H, m), 1.84 - 2.04 (1 H, m), 2.74 (1 H, dd, *J*=11.2, 3.3 Hz), 2.79 - 3.08 (3 H, m), 3.78 - 3.88 (1 H, m), 3.88 - 4.12 (2 H, m), 7.72 (1 H, dd, *J*=8.1, 7.3 Hz), 8.24 (1 H, d, *J*=8.1 Hz), 8.43 - 8.55 (2 H, m), 9.20 (1 H, s) ppm.

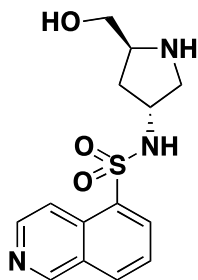

***N*-((3*R*,5*S*)-5-(hydroxymethyl)pyrrolidin-3-yl)isoquinoline-5-sulfonamide (BRD1303).**  $^1\text{H}$  NMR (300 MHz, CHLOROFORM-*d*)  $\delta$  = 1.38 - 1.51 (1 H, m), 1.58 - 1.70 (1 H, m), 1.95 - 2.14 (1 H, m), 2.72 - 2.87 (2 H, m), 2.90 - 3.04 (1 H, m), 3.22 - 3.36 (1 H, m), 3.36 - 3.63 (3 H, m), 3.74 - 3.87 (1 H, m), 7.68 - 7.81 (1 H, m), 8.18 - 8.31 (1 H, m), 8.39 - 8.46 (1 H, m), 8.46 - 8.54 (1 H, m), 8.70 - 8.77 (1 H, m), 9.38 - 9.42 (1 H, m) ppm.

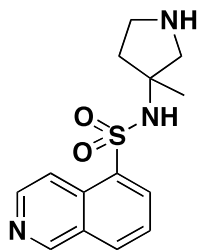

***N*-(3-methylpyrrolidin-3-yl)isoquinoline-5-sulfonamide (BRD5165).**  $^1\text{H}$  NMR (300 MHz, CHLOROFORM-*d*)  $\delta$  = 1.19 (3 H, s), 1.52 - 1.65 (1 H, m), 1.86 - 2.04 (2 H, m), 2.49 - 2.62 (1 H, m), 2.75 - 2.88 (2 H, m), 2.90 - 3.05 (1 H, m), 7.64 (1 H, t,  $J=7.6$  Hz), 8.09 - 8.19 (1 H, m), 8.29 (1 H, d,  $J=6.2$  Hz), 8.43 (1 H, dd,  $J=7.5, 1.3$  Hz), 8.64 (1 H, d,  $J=5.8$  Hz), 9.30 (1 H, s) ppm.

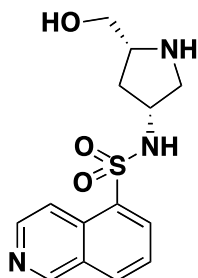

***N*-((3*R*,5*R*)-5-(hydroxymethyl)pyrrolidin-3-yl)isoquinoline-5-sulfonamide (BRD7787).**  $^1\text{H}$  NMR (500 MHz, CHLOROFORM-*d*)  $\delta$  = 1.34 (1 H, d,  $J=14.2$  Hz), 1.49 (1 H, t,  $J=7.1$  Hz), 2.03 (2 H, ddd,  $J=13.9, 9.5, 7.3$  Hz), 2.74 - 2.89 (2 H, m), 3.30 (1 H, dd,  $J=9.0, 4.1$  Hz), 3.41 (1 H, dd,  $J=10.7, 3.4$  Hz), 3.54 - 3.66 (2 H, m), 3.76 - 3.86 (1 H, m), 7.73 (1 H, t,  $J=7.8$  Hz), 8.23 (1 H, d,  $J=8.3$  Hz), 8.41 (1 H, d,  $J=6.3$  Hz), 8.49 (1 H, d,  $J=7.3$  Hz), 8.71 (1 H, d,  $J=6.3$  Hz), 9.34 - 9.42 (1 H, m) ppm.

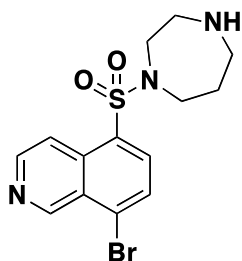

**5-(1,4-diazepan-1-ylsulfonyl)-8-bromoisoquinoline (BRD9509).**  $^1\text{H}$  NMR (300 MHz, CHLOROFORM-*d*)  $\delta$  = 2.03 - 2.22 (2 H, m), 2.81 - 3.15 (9 H, m), 3.22 - 3.34 (4 H, m), 3.50 - 3.58 (2 H, m), 3.89 - 3.99 (2 H, m), 7.67 (1 H, dd,  $J=8.3, 4.7$  Hz), 7.95 (1 H, d,  $J=8.3$  Hz), 8.31 - 8.39 (1 H, m), 8.67 (1 H, dd,  $J=8.5, 1.1$  Hz), 9.08 (1 H, dd,  $J=2.7, 1.0$  Hz) ppm.

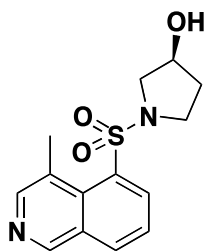

**(*S*)-1-(4-methylisoquinolin-5-ylsulfonyl)pyrrolidin-3-ol (BRD2334).**  $^1\text{H}$  NMR (300 MHz, CHLOROFORM-*d*)  $\delta$  = 2.07 - 2.33 (2 H, m), 2.40 (1 H, m), 3.10 (3 H, s), 3.59 (1 H, d,  $J=11.3$  Hz), 3.64 - 3.87 (3 H, m), 4.66 - 4.77 (1 H, m), 7.61 (1 H, t,  $J=7.5$  Hz), 8.15 (1 H, d,  $J=8.5$  Hz), 8.39 (1 H, d,  $J=7.3$  Hz), 8.55 (1 H, s), 9.14 (1 H, s) ppm.

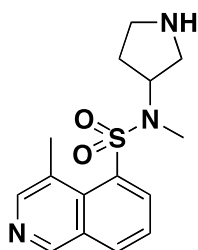

***N*,4-dimethyl-*N*-(pyrrolidin-3-yl)isoquinoline-5-sulfonamide (BRD4275).**  $^1\text{H}$  NMR (300 MHz, CHLOROFORM-*d*)  $\delta$  = 1.96 - 2.20 (2 H, m), 2.89 - 3.04 (5 H, m), 3.04 - 3.15 (4 H, m), 3.18 - 3.31 (1 H, m), 4.43 - 4.60 (1 H, m), 7.62 (1 H, t,  $J=7.7$  Hz), 8.07 - 8.23 (2 H, m), 8.56 (1 H, s), 9.16 (1 H, s) ppm.



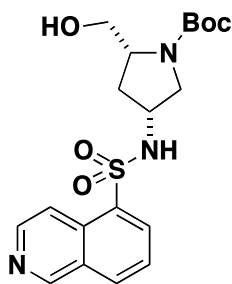

**(2*R*,4*R*)-tert-butyl 2-(hydroxymethyl)-4-(isoquinoline-5-sulfonamido)pyrrolidine-1-carboxylate (26).**  $^1\text{H}$  NMR (500 MHz, CHLOROFORM-*d*)  $\delta$  = 1.34 (4 H, br. s.), 1.38 (6 H, br. s.), 1.43 - 1.50 (1 H, m), 1.51 (1 H, d,  $J=6.3$  Hz), 1.58 (6 H, s), 1.66 - 1.75 (1 H, m), 2.13 - 2.27 (1 H, m), 2.30 - 2.43 (1 H, m), 2.95 (1 H, br. s.), 3.02 - 3.13 (1 H, m), 3.13 - 3.27 (1 H, m), 3.33 - 3.45 (2 H, m), 3.45 - 3.54 (1 H, m), 3.86 (2 H, d,  $J=4.9$  Hz), 3.96 - 4.20 (2 H, m), 6.91 (1 H, dd,  $J=6.8, 3.4$  Hz), 7.73 (1 H, t,  $J=7.8$  Hz), 8.11 - 8.20 (1 H, m), 8.24 (1 H, d,  $J=8.3$  Hz), 8.39 (1 H, d,  $J=5.9$  Hz), 8.49 (1 H, d,  $J=7.3$  Hz), 8.60 (1 H, dd,  $J=6.6, 2.7$  Hz), 8.71 (1 H, d,  $J=2.4$  Hz), 9.38 (1 H, br. s.) ppm.

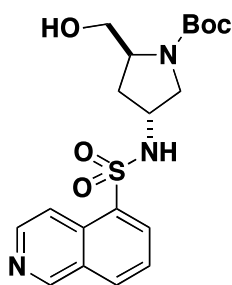

**(2*S*,4*R*)-tert-butyl 2-(hydroxymethyl)-4-(isoquinoline-5-sulfonamido)pyrrolidine-1-carboxylate (27).**  $^1\text{H}$  NMR (300 MHz, CHLOROFORM-*d*)  $\delta$  = 1.28 - 1.42 (9 H, s), 1.55 - 1.79 (2 H, m), 1.79 - 1.96 (1 H, m), 3.13 - 3.25 (1 H, m), 3.29 - 3.43 (1 H, m), 3.43 - 3.54 (1 H, m), 3.54 - 3.67 (1 H, m), 3.82 - 4.03 (2 H, m), 5.26 - 5.42 (1 H, m), 7.76 (1 H, t,  $J=7.8$  Hz), 8.27 (1 H, d,  $J=8.1$  Hz), 8.40 (1 H, d,  $J=6.0$  Hz), 8.50 (1 H, dd,  $J=7.4, 1.2$  Hz), 8.72 (1 H, d,  $J=6.0$  Hz), 9.41 (1 H, s) ppm.

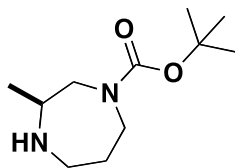

**(*S*)-tert-butyl 3-methyl-1,4-diazepane-1-carboxylate (28).**  $^1\text{H}$  NMR (300 MHz, CHLOROFORM-*d*)  $\delta$  = 0.97 - 1.12 (3 H, m), 1.32 - 1.51 (9 H, m), 1.58 - 1.79 (2 H, m), 1.79 - 2.03 (1 H, m), 2.53 - 2.78 (2 H, m), 2.82 - 2.97 (1 H, m), 3.02 - 3.29 (2 H, m), 3.61 - 3.83 (1 H, m) ppm.

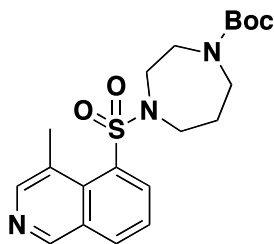

**tert-butyl 4-(4-methylisoquinolin-5-ylsulfonyl)-1,4-diazepane-1-carboxylate (9).**  $^1\text{H}$  NMR (300 MHz, CHLOROFORM-*d*)  $\delta$  = 1.40 - 1.57 (10 H, m), 2.06 (2 H, d,  $J=5.8$  Hz), 2.99 - 3.13 (3 H, m), 3.45 - 3.73 (8 H, m), 5.31 (2 H, s), 7.59 (1 H, t,  $J=7.6$  Hz), 7.74 (1 H, s), 8.07 - 8.22 (1 H, m), 8.56 (1 H, s), 9.15 (1 H, s) ppm.

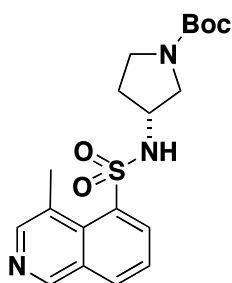

**(*R*)-tert-butyl 3-(4-methylisoquinoline-5-sulfonamido)pyrrolidine-1-carboxylate (10).**  $^1\text{H}$  NMR (300 MHz, CHLOROFORM-*d*)  $\delta$  = 1.35 (9 H, br. s.), 1.97 (2 H, br. s.), 2.11 (1 H, br. s.), 2.97 (3 H, s), 3.28 (4 H, br. s.), 3.92 (1 H, br. s.), 6.19 (1 H, br. s.), 7.49 (1 H, s), 8.04 (1 H, br. s.), 8.44 (1 H, br. s.), 9.05 (1 H, s) ppm.

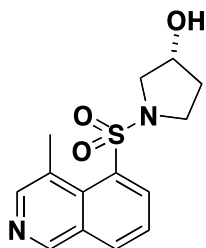

**(*R*)-1-(4-methylisoquinolin-5-ylsulfonyl)pyrrolidin-3-ol (25).**  $^1\text{H}$  NMR (300 MHz, CHLOROFORM-*d*)  $\delta$  = 2.07 (2 H, br. s.), 3.01 (3 H, s), 3.52 (1 H, s), 3.64 (3 H, d,  $J=3.6$  Hz), 4.63 (1 H, br. s.), 7.43 - 7.60 (1 H, m), 8.04 (1 H, s), 8.30 (1 H, s), 8.45 (1 H, s), 9.04 (1 H, s) ppm.

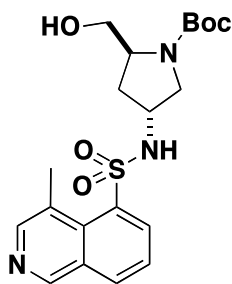

**(2*S*,4*R*)-tert-butyl 2-(hydroxymethyl)-4-(4-methylisoquinoline-5-sulfonamido)pyrrolidine-1-carboxylate (22).**  $^1\text{H}$  NMR (500 MHz, CHLOROFORM-*d*)  $\delta$  = 1.46 (9 H, br. s.), 1.68 (2 H, br. s.), 2.01 (1 H, d,  $J=3.4$  Hz), 2.08 - 2.21 (1 H, m), 3.07 (3 H, s), 3.52 (1 H, br. s.), 3.55 - 3.67 (2 H, m), 3.70 (1 H, br. s.), 4.07 (1 H, br. s.), 4.15 (2 H, br. s.), 5.29 (1 H, br. s.), 7.64 (1 H, t,  $J=7.8$  Hz), 8.20 (1 H, d,  $J=7.8$  Hz), 8.49 (1 H, d,  $J=7.3$  Hz), 8.57 (1 H, s), 9.18 (1 H, s) ppm.

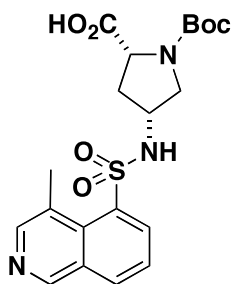

**(2*R*,4*R*)-1-(tert-butoxycarbonyl)-4-(4-methylisoquinoline-5-sulfonamido)pyrrolidine-2-carboxylic acid (30).**  $^1\text{H}$  NMR (300 MHz, MeOD)  $\delta$  = 1.11 - 1.18 (1 H, m), 1.21 - 1.27 (1 H, m), 1.34 - 1.41 (9 H, m), 1.98 - 2.10 (1 H, m), 2.64 (1 H, dd,  $J=6.7, 5.9$  Hz), 3.02 (3 H, s), 3.32 - 3.41 (1 H, m), 3.53 - 3.62 (1 H, m), 3.74 (1 H, dd,  $J=10.7, 6.2$  Hz), 3.86 - 3.97 (1 H, m), 4.10 - 4.21 (1 H, m), 7.74 (1 H, t,  $J=7.9$  Hz), 8.13 (1 H, s), 8.31 (1 H, d,  $J=8.1$  Hz), 8.42 (1 H, s), 8.53 (1 H, d,  $J=7.5$  Hz), 9.14 (1 H, s) ppm.

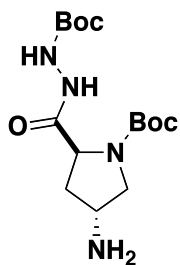

**(2*S*,4*R*)-tert-butyl 4-amino-2-(2-(tert-butoxycarbonyl)hydrazinecarbonyl)pyrrolidine-1-carboxylate (31).**  $^1\text{H}$  NMR (500 MHz, METHANOL-*d*<sub>4</sub>)  $\delta$  = 1.26 - 1.37 (1 H, m), 1.42 - 1.53 (19 H, m), 1.93 - 1.97 (1 H, m), 2.00 - 2.15 (1 H, m), 2.17 - 2.30 (1 H, m), 2.85 - 2.90 (1 H, m), 2.99 - 3.04 (1 H, m), 3.13 - 3.23 (1 H, m), 3.61 - 3.75 (2 H, m), 4.28 - 4.39 (1 H, m) ppm.

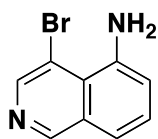

**4-bromoisoquinolin-5-amine (3).**  $^1\text{H}$  NMR (500 MHz, CHLOROFORM-*d*)  $\delta$  = 5.25 (2 H, br. s.), 6.94 (1 H, d,  $J=7.3$  Hz), 7.35 - 7.39 (1 H, m), 7.42 (1 H, t,  $J=7.8$  Hz), 8.53 (1 H, s), 9.00 (1 H, s) ppm.

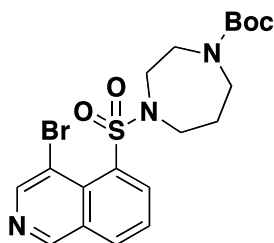

**tert-butyl 4-(4-bromoisoquinolin-5-ylsulfonyl)-1,4-diazepane-1-carboxylate (4).**  $^1\text{H}$  NMR (300 MHz, CHLOROFORM-*d*)  $\delta$  = 1.32 - 1.47 (10 H, m), 1.57 (1 H, s), 2.00 (2 H, br. s.), 3.43 (4 H, s), 3.56 (5 H, br. s.), 7.60 (1 H, s), 7.79 (1 H, s), 8.09 (1 H, s), 8.93 (1 H, s), 9.14 (1 H, s) ppm.

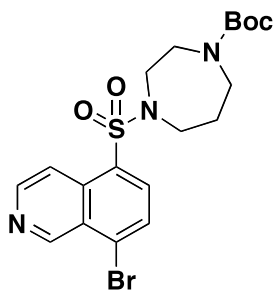

**tert-butyl 4-(8-bromoisoquinolin-5-ylsulfonyl)-1,4-diazepane-1-carboxylate (6).**  $^1\text{H}$  NMR (300 MHz, CHLOROFORM-*d*)  $\delta$  = 1.37 - 1.46 (9 H, m), 1.98 (2 H, t,  $J=5.8$  Hz), 3.43 (2 H, t,  $J=5.9$  Hz), 3.50 - 3.65 (6 H, m), 7.63 (1 H, dd,  $J=8.4, 4.1$  Hz), 7.91 (1 H, d,  $J=7.9$  Hz), 8.34 (1 H, d,  $J=7.9$  Hz), 8.62 (1 H, d,  $J=8.9$  Hz), 9.06 (1 H, br. s.) ppm;  $^{13}\text{C}$  NMR (150 MHz, CHLOROFORM-*d*)  $\delta$  = 14.5, 21.3, 28.7, 28.8, 45.9, 46.5, 48.5, 50.3, 50.4, 51.3, 51.8, 53.7, 60.6, 79.9, 80.0, 123.0, 123.3, 128.2, 128.6, 129.5, 129.6, 133.1, 136.3, 136.4, 137.5, 137.7, 144.7, 151.8, 151.9, 155.2, 155.5 ppm.

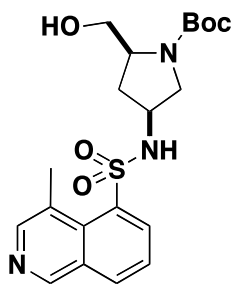

**(2*S*,4*S*)-tert-butyl 2-(hydroxymethyl)-4-(4-methylisoquinoline-5-sulfonamido)pyrrolidine-1-carboxylate (32).**  $^1\text{H}$  NMR (300 MHz, CHLOROFORM-*d*)  $\delta$  = 1.20 - 1.28 (1 H, m), 1.37 - 1.45 (9 H, m), 1.89 - 2.15 (1 H, m), 2.49 (1 H, dddd,  $J=5.2, 3.8, 2.3, 1.1$  Hz), 2.98 - 3.11 (3 H, m), 3.48 - 3.68 (3 H, m), 3.88 - 4.06 (2 H, m), 4.14 - 4.30 (1 H, m), 7.59 (1 H, t,  $J=7.6$  Hz), 8.07 - 8.17 (1 H, m), 8.44 - 8.57 (2 H, m), 9.11 (1 H, br. s.) ppm.

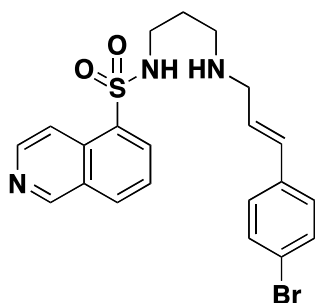

**(*E*)-*N*-(3-(3-(4-bromophenyl)allyl)amino)propyl)isoquinoline-5-sulfonamide (BRD5149).**  $^1\text{H}$  NMR (300 MHz, CHLOROFORM-*d*)  $\delta$  = 2.50 - 2.63 (2 H, m), 2.93 - 3.03 (2 H, m), 3.16 - 3.26 (2 H, m), 6.14 (1 H, dt,  $J=15.9, 6.1$  Hz), 6.32 - 6.47 (1 H, m), 7.11 - 7.20 (2 H, m), 7.32 - 7.42 (2 H, m), 7.62 (1 H, t,  $J=7.7$  Hz), 8.12 (1 H, d,  $J=8.1$  Hz), 8.32 - 8.41 (2 H, m), 8.56 (1 H, d,  $J=6.2$  Hz), 9.29 (1 H, s) ppm.

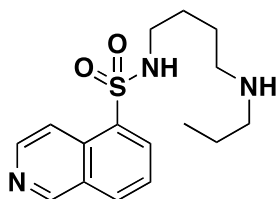

***N*-(4-(propylamino)butyl)isoquinoline-5-sulfonamide (BRD1524).**  $^1\text{H}$  NMR (500 MHz, CHLOROFORM-*d*)  $\delta$  = 0.99 (3 H, t,  $J=7.5$  Hz), 1.55 - 1.62 (2 H, m), 1.62 - 1.75 (4 H, m), 2.69 - 2.76 (4 H, m), 2.90 - 2.97 (2 H, m), 7.70 (1 H, t,  $J=7.9$  Hz), 8.20 (1 H, d,  $J=8.4$  Hz), 8.43 (1 H, d,  $J=7.3$  Hz), 8.53 (1 H, d,  $J=6.2$  Hz), 8.68 (1 H, d,  $J=6.2$  Hz), 9.36 (1 H, s) ppm.

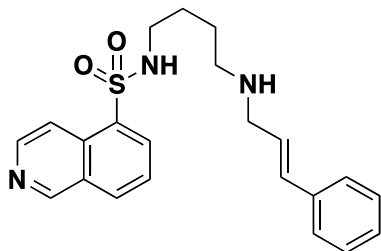

**(E)-N-(4-(cinnamylamino)butyl)isoquinoline-5-sulfonamide (BRD2874).**  $^1\text{H}$  NMR (300 MHz, CHLOROFORM- $d$ )  $\delta$  = 1.39 - 1.65 (4 H, m), 2.56 - 2.70 (2 H, m), 2.91 (2 H, t,  $J=5.6$  Hz), 3.47 (2 H, d,  $J=6.4$  Hz), 6.34 - 6.49 (1 H, m), 6.53 - 6.66 (1 H, m), 7.20 - 7.37 (3 H, m), 7.37 - 7.47 (2 H, m), 7.60 - 7.71 (1 H, m), 8.17 (1 H, d,  $J=8.1$  Hz), 8.44 (1 H, dd,  $J=7.3, 1.1$  Hz), 8.53 (2 H, q,  $J=6.2$  Hz), 9.34 (1 H, s) ppm.

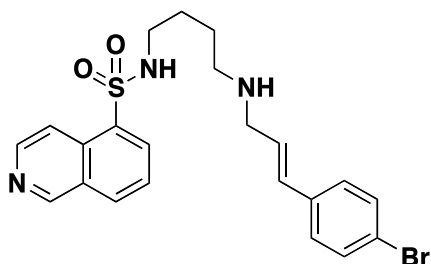

**(E)-N-(4-(3-(4-bromophenyl)allylamino)butyl)isoquinoline-5-sulfonamide (BRD6081).**  $^1\text{H}$  NMR (300 MHz, CHLOROFORM- $d$ )  $\delta$  = 1.33 - 1.56 (4 H, m), 2.49 - 2.62 (2 H, m), 2.82 (2 H, t,  $J=5.7$  Hz), 3.30 - 3.40 (2 H, m), 6.26 - 6.40 (1 H, m), 6.40 - 6.51 (1 H, m), 7.14 - 7.24 (2 H, m), 7.29 - 7.39 (2 H, m), 7.53 - 7.64 (1 H, m), 8.09 (1 H, d,  $J=8.3$  Hz), 8.30 - 8.44 (2 H, m), 8.45 - 8.51 (2 H, m), 9.26 (1 H, s) ppm.

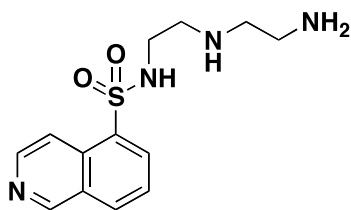

**N-(2-(2-aminoethylamino)ethyl)isoquinoline-5-sulfonamide (BRD4009).**  $^1\text{H}$  NMR (300 MHz, MeOD)  $\delta$  = 2.56 - 2.70 (4 H, m), 2.71 - 2.83 (4 H, m), 2.84 - 2.99 (4 H, m), 7.80 (1 H, t,  $J=7.9$  Hz), 8.38 (1 H, d,  $J=8.3$  Hz), 8.41 - 8.48 (1 H, m), 8.49 - 8.56 (1 H, m), 8.58 - 8.64 (1 H, m), 9.37 (1 H, s) ppm.

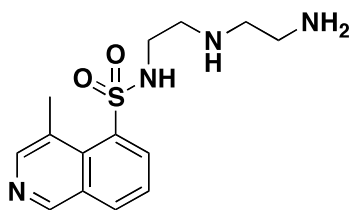

***N*-(2-(2-aminoethylamino)ethyl)-4-methylisoquinoline-5-sulfonamide (BRD3407).** <sup>1</sup>H NMR (300 MHz, MeOD)  $\delta$  = 1.85 (1 H, s), 2.58 - 2.69 (2 H, m), 2.70 - 2.80 (3 H, m), 2.95 - 3.00 (3 H, m), 3.10 - 3.19 (4 H, m), 7.70 (1 H, d,  $J=7.9$  Hz), 8.21 - 8.30 (1 H, m), 8.33 - 8.41 (2 H, m), 9.09 (1 H, s) ppm.

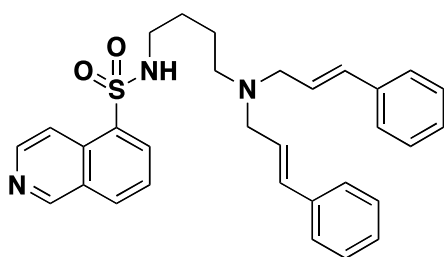

***N*-(4-(dicinnamylamino)butyl)isoquinoline-5-sulfonamide (BRD2686).** <sup>1</sup>H NMR (300 MHz, CHLOROFORM-*d*)  $\delta$  = 1.33 - 1.56 (4 H, m), 2.25 - 2.43 (2 H, m), 2.72 - 2.87 (2 H, m), 3.10 - 3.24 (4 H, m), 6.11 - 6.29 (2 H, m), 6.32 - 6.46 (2 H, m), 7.03 - 7.29 (10 H, m), 7.43 - 7.51 (1 H, m), 8.00 (1 H, d,  $J=8.1$  Hz), 8.28 (1 H, dd,  $J=7.3, 1.1$  Hz), 8.34 - 8.44 (2 H, m), 9.18 (1 H, s) ppm.

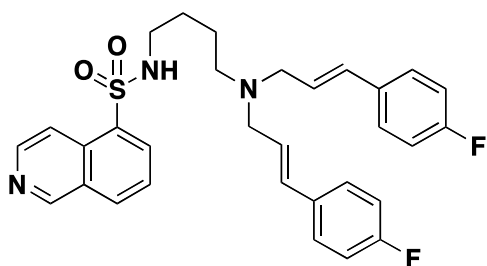

***N*-(4-(bis((*E*)-3-(4-fluorophenyl)allyl)amino)butyl)isoquinoline-5-sulfonamide (BRD5822).** <sup>1</sup>H NMR (300 MHz, CHLOROFORM-*d*)  $\delta$  = 2.42 - 2.60 (2 H, m), 2.96 (2 H, t,  $J=5.2$  Hz), 3.32 (4 H, d,  $J=6.8$  Hz), 6.30 (2 H, dt,  $J=15.8, 6.8$  Hz), 6.43 - 6.58 (2 H, m), 6.94 - 7.08 (4 H, m), 7.30 - 7.40 (4 H, m), 7.65 (1 H, t,  $J=7.8$  Hz), 8.18 (1 H, d,  $J=8.3$  Hz), 8.43 (1 H, dd,  $J=7.3, 1.1$  Hz), 8.56 (2 H, q,  $J=6.2$  Hz), 9.35 (1 H, s) ppm.

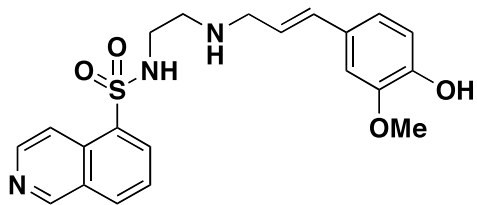

**(E)-N-(2-(3-(4-hydroxy-3-methoxyphenyl)allylamino)ethyl)isoquinoline-5-sulfonamide (BRD8902).**  $^1\text{H}$  NMR (300 MHz, MeOD)  $\delta$  = 1.86 - 1.95 (1 H, m), 2.01 (1 H, s), 2.53 - 2.65 (2 H, m), 2.95 - 3.04 (3 H, m), 3.13 - 3.22 (3 H, m), 3.79 - 3.87 (3 H, m), 5.80 - 5.98 (1 H, m), 6.31 (1 H, d,  $J=15.4$  Hz), 6.67 - 6.81 (2 H, m), 6.92 (1 H, s), 7.76 (1 H, t,  $J=7.9$  Hz), 8.32 (1 H, d,  $J=8.5$  Hz), 8.44 (1 H, d,  $J=7.3$  Hz), 8.49 - 8.56 (1 H, m), 8.57 - 8.64 (1 H, m), 9.32 (1 H, s) ppm.

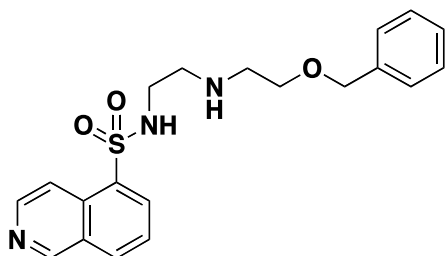

**N-(2-(2-(benzyloxy)ethylamino)ethyl)isoquinoline-5-sulfonamide (BRD1600).**  $^1\text{H}$  NMR (300 MHz, MeOD)  $\delta$  = 2.52 - 2.65 (4 H, m), 2.96 (2 H, t,  $J=6.1$  Hz), 3.44 (2 H, t,  $J=5.3$  Hz), 4.45 (2 H, s), 7.20 - 7.35 (5 H, m), 7.79 (1 H, t,  $J=7.8$  Hz), 8.37 (1 H, d,  $J=8.1$  Hz), 8.42 - 8.48 (1 H, m), 8.50 - 8.55 (1 H, m), 8.56 - 8.62 (1 H, m), 9.36 (1 H, s) ppm.

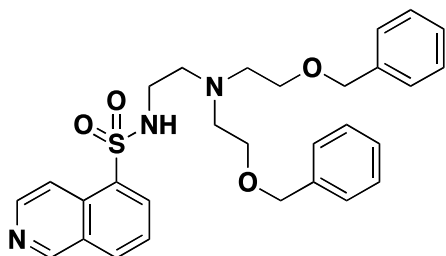

**N-(2-(bis(2-(benzyloxy)ethyl)amino)ethyl)isoquinoline-5-sulfonamide (BRD5967).**  $^1\text{H}$  NMR (300 MHz, MeOD)  $\delta$  = 2.44 - 2.59 (4 H, m), 2.92 (2 H, t,  $J=6.3$  Hz), 3.27 - 3.34 (4 H, m), 4.32 - 4.41 (4 H, m), 7.10 - 7.34 (10 H, m), 7.69 - 7.79 (1 H, m), 8.28 - 8.36 (1 H, m), 8.37 - 8.44 (1 H, m), 8.44 - 8.57 (2 H, m), 9.27 - 9.35 (1 H, m) ppm.



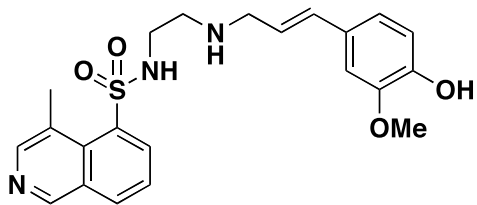

**(E)-N-(2-(3-(4-hydroxy-3-methoxyphenyl)allylamino)ethyl)-4-methylisoquinoline-5-sulfonamide (BRD9159).**  $^1\text{H}$  NMR (300 MHz, MeOD)  $\delta$  = 2.89 - 3.00 (2 H, m), 3.00 - 3.09 (3 H, m), 3.31 - 3.38 (1 H, m), 3.44 - 3.51 (1 H, m), 3.83 (3 H, s), 6.08 (1 H, d,  $J=15.4$  Hz), 6.45 - 6.60 (1 H, m), 6.71 (1 H, d,  $J=8.1$  Hz), 6.79 - 6.88 (1 H, m), 6.98 (1 H, s), 7.68 - 7.79 (1 H, m), 8.28 - 8.34 (1 H, m), 8.39 (1 H, dd,  $J=7.6, 1.4$  Hz), 8.44 (1 H, s), 8.52 (1 H, s), 9.15 (1 H, s) ppm.

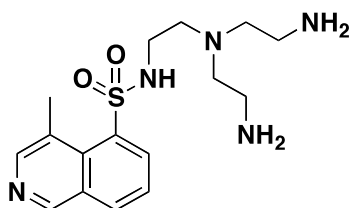

**N-(2-(bis(2-aminoethyl)amino)ethyl)-4-methylisoquinoline-5-sulfonamide (BRD3394).**  $^1\text{H}$  NMR (300 MHz, MeOD)  $\delta$  = 2.51 - 2.59 (3 H, m), 2.61 - 2.68 (2 H, m), 2.73 - 2.81 (3 H, m), 2.95 - 3.01 (3 H, m), 3.11 - 3.18 (3 H, m), 7.70 (1 H, d,  $J=7.7$  Hz), 8.26 (1 H, dd,  $J=8.2, 0.8$  Hz), 8.34 (1 H, s), 8.35 - 8.40 (1 H, m), 9.09 (1 H, s) ppm.

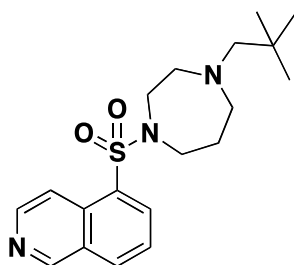

**5-(4-neopentyl-1,4-diazepan-1-ylsulfonyl)isoquinoline (BRD5665).**  $^1\text{H}$  NMR (300 MHz, MeOD)  $\delta$  = 0.81 - 0.93 (9 H, m), 1.87 - 2.02 (2 H, m), 2.35 - 2.46 (2 H, m), 2.89 - 3.09 (4 H, m), 3.42 - 3.61 (4 H, m), 7.71 (1 H, t,  $J=7.9$  Hz), 8.22 (1 H, d,  $J=8.5$  Hz), 8.31 - 8.39 (1 H, m), 8.47 (1 H, d,  $J=6.2$  Hz), 8.61 - 8.76 (1 H, br.s.), 9.37 (1 H, br.s.) ppm.

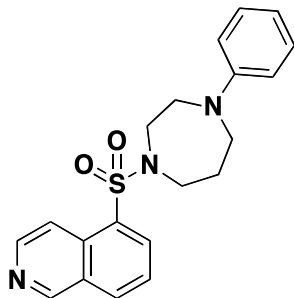

**5-(4-phenyl-1,4-diazepan-1-ylsulfonyl)isoquinoline (BRD5656).** Compound **BRD5656** was synthesized following the known procedure.<sup>1</sup> <sup>1</sup>H NMR (300 MHz, CHLOROFORM-d)  $\delta$  = 1.91 - 2.07 (2 H, m), 3.22 (2 H, t, J=6.0 Hz), 3.43 - 3.52 (2 H, m), 3.52 - 3.67 (4 H, m), 6.53 (2 H, d, J=7.9 Hz), 6.59 (1 H, t, J=7.3 Hz), 7.05 - 7.12 (2 H, m), 7.56 (1 H, t, J=7.8 Hz), 8.08 (1 H, d, J=8.3 Hz), 8.21 (1 H, dd, J=7.4, 1.2 Hz), 8.31 (1 H, d, J=6.2 Hz), 8.55 (1 H, d, J=6.2 Hz), 9.24 (1 H, s) ppm.

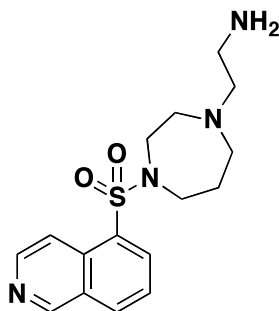

**2-(4-(isoquinolin-5-ylsulfonyl)-1,4-diazepan-1-yl)ethanamine (BRD0112).** <sup>1</sup>H NMR (500 MHz, METHANOL-d4)  $\delta$  = 1.89 (2 H, t, J=5.9 Hz), 2.70 (2 H, t, J=5.9 Hz), 2.79 (4 H, td, J=11.1, 5.6 Hz), 2.87 (2 H, t, J=5.9 Hz), 3.49 - 3.57 (4 H, m), 7.85 (1 H, t, J=7.8 Hz), 8.43 (2 H, d, J=7.3 Hz), 8.54 (1 H, d, J=6.3 Hz), 8.65 (1 H, d, J=5.9 Hz), 9.41 (1 H, s) ppm.

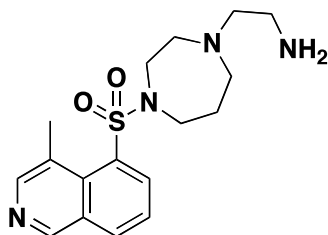

**2-(4-(4-methylisoquinolin-5-ylsulfonyl)-1,4-diazepan-1-yl)ethanamine (BRD9740).** <sup>1</sup>H NMR (500 MHz, CHLOROFORM-d)  $\delta$  = 1.73 (5 H, br. s.), 1.96 - 2.08 (2 H, m), 2.70 (2 H, t, J=5.9 Hz), 2.82 (2 H, t, J=5.9 Hz), 2.87 - 2.95 (4 H, m), 3.10 (3 H, s), 3.59 - 3.71 (4 H, m), 7.61 (1 H, t, J=7.8 Hz), 7.87 (1 H, d, J=7.3 Hz), 8.16 (1 H, d, J=7.8 Hz), 8.57 (1 H, s), 9.16 (1 H, s) ppm.

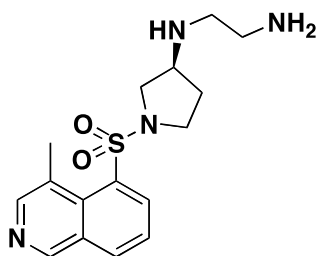

**(S)-N<sup>1</sup>-(1-(4-methylisoquinolin-5-ylsulfonyl)pyrrolidin-3-yl)ethane-1,2-diamine (BRD1596).** <sup>1</sup>H NMR (300 MHz, MeOD)  $\delta$  = 1.97 - 2.10 (1 H, m), 2.26 - 2.40 (1 H, m), 2.73 - 2.86 (2 H, m), 2.86 - 2.94 (2 H, m), 3.06 (3 H, s), 3.39 (1 H, dd, J=9.2, 4.7 Hz), 3.55 - 3.66 (2 H, m), 3.66 - 3.79 (2 H, m), 7.78 (1 H, t, J=7.8 Hz), 8.37 (1 H, dd, J=8.4, 1.2 Hz), 8.43 (1 H, dd, J=7.5, 1.3 Hz), 8.47 (1 H, s), 9.19 (1 H, s) ppm.

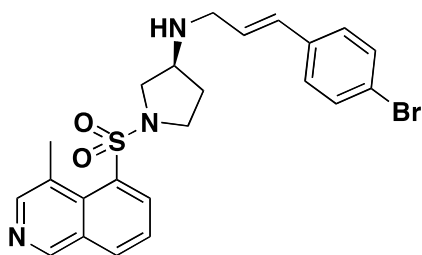

**(S,E)-N-(3-(4-bromophenyl)allyl)-1-(4-methylisoquinolin-5-ylsulfonyl)pyrrolidin-3-amine (BRD8155).** <sup>1</sup>H NMR (300 MHz, CHLOROFORM-d)  $\delta$  = 1.94 - 2.07 (1 H, m), 2.23 - 2.40 (1 H, m), 3.10 (3 H, s), 3.41 - 3.52 (3 H, m), 3.61 - 3.78 (4 H, m), 6.24 - 6.40 (1 H, m), 6.49 - 6.61 (1 H, m), 7.21 - 7.30 (3 H, m), 7.42 - 7.52 (2 H, m), 7.57 (1 H, t, J=7.8 Hz), 8.15 (1 H, dd, J=8.2, 1.2 Hz), 8.49 (1 H, dd, J=7.5, 1.3 Hz), 8.56 (1 H, s), 9.15 (1 H, s) ppm; <sup>13</sup>C NMR (75 MHz, CHLOROFORM-d)  $\delta$  = 21.6, 32.6, 46.9, 49.8, 53.6, 57.4, 125.0, 127.8, 128.4, 130.6, 131.1, 131.8, 134.4, 148.5, 151.9 ppm.

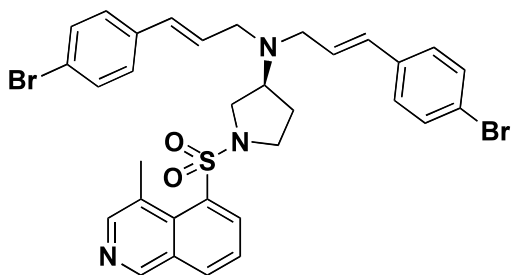

**(S)-N,N-bis((E)-3-(4-bromophenyl)allyl)-1-(4-methylisoquinolin-5-ylsulfonyl)pyrrolidin-3-amine (BRD3615).** <sup>1</sup>H NMR (300 MHz, CHLOROFORM-d)  $\delta$  = 1.60 (3 H, td, J=3.5, 2.0 Hz), 3.09 (3 H, s), 3.35 - 3.47 (5 H, m), 3.48 - 3.66 (3 H, m), 3.72 (2 H, s), 3.77 - 3.88 (1 H, m), 6.20 - 6.34 (2 H, m), 6.45 - 6.57 (2 H, m), 7.20 - 7.31 (6 H, m), 7.44

- 7.51 (4 H, m), 7.57 (1 H, t, J=7.8 Hz), 8.11 - 8.22 (2 H, m), 8.57 (1 H, s), 9.16 (1 H, s) ppm.

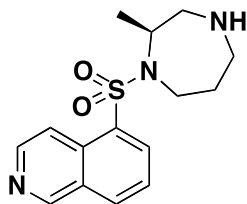

**(S)-5-(2-methyl-1,4-diazepan-1-ylsulfonyl)isoquinoline (BRD1869).** Sulfonamide **BRD9304** (20 mg, 0.051 mmol, 1 equiv.) and *N,N'*-dimethylbarbituric acid (80 mg, 0.51 mmol, 10 equiv.) were dissolved in dry THF (2.6 mL). After the addition of tetrakis(triphenylphosphine)palladium(0) (6 mg, 0.0051 mmol, 0.1 equiv.), the solution was degassed with nitrogen and stirred for 2 h under room temperature. The solution was filtered through a short column of Celite and the column was washed by EA. The solvent was removed under reduced pressure and the residue was purified by prep-HPLC. <sup>1</sup>H NMR (300 MHz, CHLOROFORM-*d*)  $\delta$  = 0.75 - 0.85 (3 H, m), 1.46 - 1.61 (2 H, m), 1.61 - 1.84 (2 H, m), 2.51 (1 H, dd, J=14.5, 8.7 Hz), 2.62 - 2.75 (1 H, m), 3.02 - 3.31 (3 H, m), 3.88 - 4.01 (1 H, m), 4.03 - 4.16 (1 H, m), 7.71 (1 H, t, J=7.8 Hz), 8.21 (1 H, d, J=8.3 Hz), 8.40 (1 H, d, J=6.2 Hz), 8.56 - 8.61 (1 H, m), 8.72 (1 H, d, J=6.2 Hz), 9.36 (1 H, s) ppm.

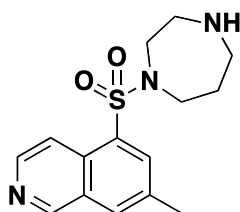

**5-(1,4-diazepan-1-ylsulfonyl)-7-methylisoquinoline (BRD5087).** <sup>1</sup>H NMR (300 MHz, CHLOROFORM-*d*)  $\delta$  = 1.65 (3 H, s), 1.85 (2 H, t, J=5.9 Hz), 2.64 (3 H, s), 2.90 - 3.04 (4 H, m), 3.40 - 3.56 (4 H, m), 7.97 (1 H, s), 8.24 (1 H, d, J=1.7 Hz), 8.39 (1 H, d, J=6.2 Hz), 8.64 (1 H, d, J=6.2 Hz), 9.28 (1 H, s) ppm.

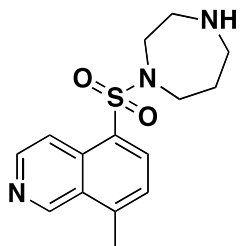

**5-(1,4-diazepan-1-ylsulfonyl)-8-methylisoquinoline (BRD5257).**  $^1\text{H}$  NMR (300 MHz, CHLOROFORM-*d*)  $\delta$  = 2.07 - 2.17 (2 H, m), 2.78 (3 H, s), 3.20 - 3.41 (4 H, m), 3.49 - 3.58 (2 H, m), 3.96 (2 H, ddd,  $J=5.0, 3.6, 1.1$  Hz), 7.44 - 7.50 (1 H, m), 7.58 (1 H, dd,  $J=8.5, 4.1$  Hz), 8.35 - 8.48 (3 H, m), 9.05 (1 H, dd,  $J=4.1, 1.5$  Hz) ppm.

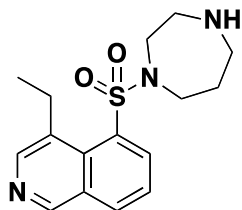

**5-(1,4-diazepan-1-ylsulfonyl)-4-ethylisoquinoline (BRD5930).**  $^1\text{H}$  NMR (300 MHz, CHLOROFORM-*d*)  $\delta$  = 1.38 (3 H, t,  $J=7.4$  Hz), 1.93 - 2.05 (2 H, m), 3.05 - 3.16 (4 H, m), 3.55 - 3.71 (6 H, m), 7.62 (1 H, d,  $J=7.9$  Hz), 7.82 - 7.90 (1 H, m), 8.12 - 8.20 (1 H, m), 8.64 (1 H, s), 9.15 (1 H, s) ppm.

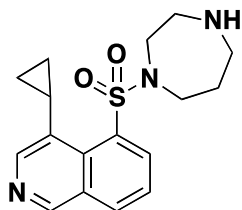

**5-(1,4-diazepan-1-ylsulfonyl)-4-cyclopropylisoquinoline (BRD5796).**  $^1\text{H}$  NMR (300 MHz, CHLOROFORM-*d*)  $\delta$  = 0.80 - 0.92 (2 H, m), 1.18 - 1.28 (2 H, m), 1.90 - 2.02 (2 H, m), 3.02 - 3.15 (4 H, m), 3.16 - 3.30 (1 H, m), 3.51 - 3.68 (4 H, m), 7.56 - 7.66 (1 H, m), 7.87 (1 H, d,  $J=7.2$  Hz), 8.10 - 8.20 (1 H, m), 8.54 (1 H, s), 9.13 (1 H, s) ppm.

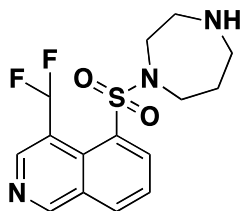

**5-(1,4-diazepan-1-ylsulfonyl)-4-(difluoromethyl)isoquinoline (BRD8757).** To a solution of **14** (8.5 mg, 0.02 mmol) in 2 mL THF/water (1:1) was added a solution of  $\text{OsO}_4$  in *t*-BuOH (0.08 M, 5  $\mu\text{L}$ , 0.4  $\mu\text{mol}$ , 0.02 equiv.) and sodium periodate (8.7 mg, 0.04 mmol, 2 equiv.). The reaction mixture was stirred overnight under room temperature. 2 mL 1 M  $\text{NaHSO}_3$  (aq.) was added. After a further 90 minutes the mixture was diluted with 2 mL water and extracted first with  $\text{CHCl}_3$  (3 x 4 mL) and then with EA (3 x 4 mL). Drying over sodium sulfate and the evaporation of the solvent from the organic phase gave an oily residue (**16**). Under nitrogen, the mixture of the crude product

**16** and DAST (0.05 mL, 0.4 mmol, 20 equiv.) in dry CH<sub>2</sub>Cl<sub>2</sub> was refluxed for 16 h. The reaction was quenched with water and extracted with EA. The organic layers were then washed with saturated brine, dried over sodium sulfate, filtered, and evaporated under reduced pressure. The residue was treated with TFA/CH<sub>2</sub>Cl<sub>2</sub> (1:1) at room temperature. The volatiles were removed under reduced pressure and the residue was purified by prep-HPLC to afford **BRD8757** (1.5 mg, 22% yield over 3 steps). <sup>1</sup>H NMR (300 MHz, CHLOROFORM-d) δ = 1.19 - 1.30 (5 H, m), 1.67 - 1.87 (19 H, m), 2.01 - 2.12 (3 H, m), 3.14 - 3.23 (4 H, m), 3.62 - 3.71 (4 H, m), 7.70 - 7.78 (1 H, m), 8.04 - 8.09 (1 H, m), 8.25 - 8.31 (1 H, m), 8.36 (1 H, t, J=53 Hz), 9.26 (1 H, s), 9.44 (1 H, s) ppm.

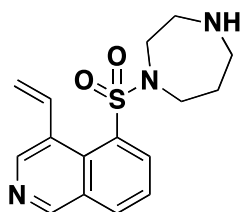

**5-(1,4-diazepan-1-ylsulfonyl)-4-vinylisoquinoline (BRD7032)**. <sup>1</sup>H NMR (300 MHz, CHLOROFORM-d) δ = 1.90 - 2.22 (3 H, m), 3.03 - 3.16 (3 H, m), 3.48 - 3.67 (4 H, m), 5.53 (1 H, dd, J=10.7, 1.5 Hz), 5.68 (1 H, dd, J=17.0, 1.5 Hz), 7.66 (1 H, t, J=7.8 Hz), 7.91 - 8.07 (2 H, m), 8.19 (1 H, dd, J=8.0, 1.0 Hz), 8.74 (1 H, d, J=0.8 Hz), 9.24 (1 H, s) ppm; <sup>13</sup>C NMR (75 MHz, CHLOROFORM-d) δ = 31.2, 47.6, 48.9, 51.1, 52.6, 117.2, 125.3, 129.8, 129.9, 130.0, 130.3, 134.0, 136.2, 136.9, 146.4, 153.0 ppm.

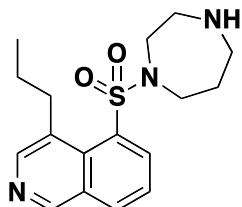

**5-(1,4-diazepan-1-ylsulfonyl)-4-propylisoquinoline (BRD7132)**. <sup>1</sup>H NMR (300 MHz, CHLOROFORM-d) δ = 1.06 (3 H, t, J=7.3 Hz), 1.65 - 1.77 (3 H, m), 1.90 - 2.03 (2 H, m), 3.06 - 3.14 (3 H, m), 3.49 - 3.70 (6 H, m), 7.59 (1 H, t, J=7.7 Hz), 7.85 (1 H, dd, J=7.3, 1.4 Hz), 8.10 - 8.19 (1 H, m), 8.61 (1 H, s), 9.14 (1 H, s) ppm.

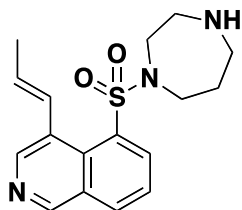

**(E)-5-(1,4-diazepan-1-ylsulfonyl)-4-(prop-1-enyl)isoquinoline (BRD9078).**  $^1\text{H}$  NMR (500 MHz, CHLOROFORM-*d*)  $\delta$  = 1.63 - 1.82 (2 H, m), 1.90 - 2.01 (2 H, m), 2.06 (3 H, d,  $J=6.3$  Hz), 3.10 (4 H, d,  $J=5.9$  Hz), 3.51 - 3.69 (4 H, m), 6.09 (1 H, dd,  $J=15.4, 6.6$  Hz), 7.58 - 7.73 (2 H, m), 7.92 (1 H, d,  $J=7.3$  Hz), 8.16 (1 H, d,  $J=7.8$  Hz), 8.67 (1 H, s), 9.19 (1 H, s) ppm;  $^{13}\text{C}$  NMR (75 MHz, CHLOROFORM-*d*)  $\delta$  = 19.1, 31.9, 48.1, 49.3, 51.4, 53.3, 125.4, 125.4, 129.8, 129.8, 130.1, 130.3, 130.8, 130.9, 134.1, 136.8, 146.5, 152.5 ppm.

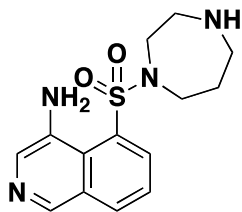

**5-(1,4-diazepan-1-ylsulfonyl)isoquinolin-4-amine (BRD2749).** Compound **BRD2749** was synthesized following the known procedure.<sup>2</sup>  $^1\text{H}$  NMR (500 MHz, CHLOROFORM-*d*)  $\delta$  = 1.85 - 1.92 (2 H, m), 3.02 - 3.08 (4 H, m), 3.54 - 3.58 (2 H, m), 3.60 (2 H, t,  $J=6.1$  Hz), 7.56 (1 H, t,  $J=7.8$  Hz), 8.03 (1 H, d,  $J=7.3$  Hz), 8.08 (1 H, d,  $J=9.3$  Hz), 8.16 (1 H, s), 8.69 (1 H, s) ppm.

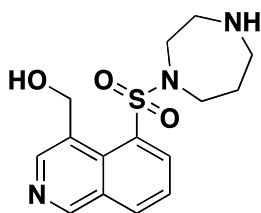

**(5-(1,4-diazepan-1-ylsulfonyl)isoquinolin-4-yl)methanol (BRD7648).** To a solution of **14** (8.5 mg, 0.02 mmol) in 2 mL THF/water (1:1) was added a solution of  $\text{OsO}_4$  in *t*-BuOH (0.08 M, 5  $\mu\text{L}$ , 0.4  $\mu\text{mol}$ , 0.02 equiv.) and sodium periodate (8.7 mg, 0.04 mmol, 2 equiv.). The reaction mixture was stirred overnight under room temperature. 2 mL 1 M  $\text{NaHSO}_3$  (aq.) were added. After a further 90 minutes the mixture was diluted with 2 mL water and extracted first with  $\text{CHCl}_3$  (3 x 4 mL) and then with EA (3 x 4 mL). Drying over sodium sulfate and evaporation of the solvent from the organic phase gave an oily residue (**16**). To the crude **16** dissolved in 1.5 mL ethanol,  $\text{NaBH}_4$  (6 mg, 0.15 mmol) was added at room temperature. The mixture was stirred for 1 h at the same temperature, quenched with water and extracted with EA. The organic layers were then washed with saturated brine, dried over sodium sulfate, filtered, and evaporated under reduced pressure. The residue was treated with TFA/ $\text{CH}_2\text{Cl}_2$  (1:1) at room temperature. The volatiles were removed under reduced pressure, and the residue was purified by prep-HPLC to afford **BRD7648** (2.2 mg, 34% yield over 3 steps).  $^1\text{H}$  NMR (500 MHz, CHLOROFORM-*d*)  $\delta$  = 1.98 (2 H, dt,  $J=12.2, 6.1$  Hz), 3.09 - 3.17 (4 H, m), 3.60 - 3.65 (2 H, m), 3.69 (2 H, t,  $J=6.3$  Hz), 5.41 - 5.47 (2 H, m), 7.67 (1 H, t,  $J=7.8$  Hz), 7.95 (1 H, d,  $J=7.8$  Hz), 8.23 (1 H, d,  $J=8.3$  Hz), 8.81 (1 H, s), 9.28 (1 H, s) ppm.

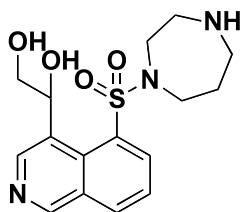

**1-(5-(1,4-diazepan-1-ylsulfonyl)isoquinolin-4-yl)ethane-1,2-diol (BRD5505).** To a solution of **14** (6.1 mg, 0.014 mmol) in 1 mL dry pyridine was added a solution of OsO<sub>4</sub> in t-BuOH (0.08 M, 0.4 mL, 0.016 mmol). The reaction mixture was stirred overnight under room temperature. 2 mL 1 M NaHSO<sub>3</sub> (aq.) were added. After a further 90 minutes the mixture was diluted with 2 mL water and extracted first with CHCl<sub>3</sub> (3 x 4 mL) and then with EA (3 x 4 mL). Drying over sodium sulfate and the evaporation of the solvent from the organic phase gave an oily residue that was subjected to TFA/CH<sub>2</sub>Cl<sub>2</sub> (1:1) directly. The final product was purified by prep-HPLC to afford **BRD5505** (1.3 mg, 26% yield). <sup>1</sup>H NMR (500 MHz, CHLOROFORM-d) δ = 2.88 - 2.93 (2 H, m), 2.98 (1 H, s), 3.00 - 3.06 (2 H, m), 3.22 (1 H, s), 3.41 (2 H, d, J=5.9 Hz), 3.45 - 3.54 (3 H, m), 3.71 - 3.82 (3 H, m), 3.84 - 3.90 (2 H, m), 6.42 (1 H, dd, J=8.1, 4.1 Hz), 7.69 (1 H, t, J=7.6 Hz), 8.24 (1 H, d, J=8.3 Hz), 8.40 (1 H, d, J=7.3 Hz), 9.07 (1 H, s), 9.28 (1 H, s) ppm.

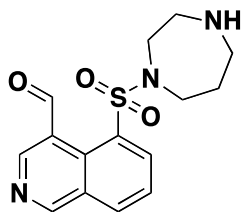

**5-(1,4-diazepan-1-ylsulfonyl)isoquinoline-4-carbaldehyde (BRD4734).** To a solution of the crude diol **15** in 2 mL THF/water (1:1) was added NaIO<sub>4</sub> (3.5 mg, 0.0162 mmol) at 0 °C. The solution was warmed to room temperature and stirred overnight, then diluted with ethyl acetate before it was quenched with an aqueous 20% Na<sub>2</sub>S<sub>2</sub>O<sub>3</sub> solution. The organic layer was separated, washed with an aqueous 20% Na<sub>2</sub>S<sub>2</sub>O<sub>3</sub> solution, water and brine, dried over sodium sulfate, filtered and concentrated. The residue was treated by 1:1 TFA/CH<sub>2</sub>Cl<sub>2</sub> for 1 h at room temperature. The volatiles were removed under reduced pressure, and the residue was purified by prep-HPLC to afford **BRD4734** 0.9 mg in 20% yield over three steps. <sup>1</sup>H NMR (500 MHz, CHLOROFORM-d) δ = 1.88 - 1.94 (2 H, m), 3.02 - 3.10 (4 H, m), 3.45 - 3.50 (2 H, m), 3.53 (2 H, t, J=6.1 Hz), 7.83 (1 H, d, J=7.8 Hz), 8.32 (2 H, dd, J=11.5, 7.6 Hz), 9.05 (1 H, s), 9.49 (1 H, s), 11.01 (1 H, s) ppm.



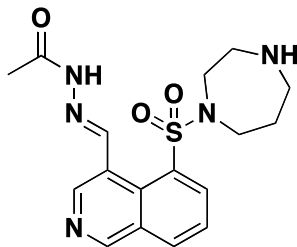

**(E)-N'-((5-(1,4-diazepan-1-ylsulfonyl)isoquinolin-4-yl)methylene)acetohydrazide (BRD0859).** To the solution of **BRD4734** (1 equiv.) and acetohydrazide (1 equiv.) in dry methanol, was added a catalytic amount of acetic acid (0.1 equiv.). The mixture was stirred overnight under 50 °C, after which the solution was concentrated and the product **BRD0859** was purified by prep-HPLC. <sup>1</sup>H NMR (300 MHz, CHLOROFORM-d) δ = 1.91 - 1.98 (2 H, m), 2.05 (1 H, s), 2.43 (3 H, s), 2.91 (1 H, s), 2.98 (1 H, s), 3.04 - 3.15 (4 H, m), 3.54 - 3.66 (4 H, m), 7.73 (1 H, d, J=8.7 Hz), 7.99 (1 H, dd, J=7.3, 1.1 Hz), 8.25 (1 H, dd, J=8.6, 1.0 Hz), 9.05 (1 H, s), 9.10 (1 H, s), 9.35 (1 H, s) ppm.

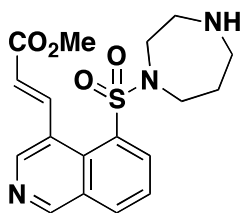

**(E)-methyl 3-(5-(1,4-diazepan-1-ylsulfonyl)isoquinolin-4-yl)acrylate (BRD7198).** In a 5 mL microwave tube was added **4** (9.9 mg, 0.021 mmol, 1 equiv.), tri-*o*-tolylphosphine (1.3 mg, .0004 mmol, 0.2 equiv.), diacetylpalladium (0.5 mg, 0.002 mmol, 0.1 equiv.) in dry DMF. The solution was degassed with nitrogen, and TEA (0.03 mL, 0.21 mmol, 10 equiv.) and methyl acrylate (0.02 mL, 0.21 mmol, 10 equiv.) were added through a syringe. The mixture was stirred overnight under 120 °C, after which the solution was filtered through a short column of Celite and the column was washed by EA. The solvent was removed under reduced pressure, and the residue was treated with TFA/CH<sub>2</sub>Cl<sub>2</sub> (1:1). The final product was purified by prep-HPLC to give **BRD7198** (5.9 mg, 0.016 mmol, 75% yield) as a white solid. <sup>1</sup>H NMR (300 MHz, CHLOROFORM-d) δ = 1.88 - 1.99 (2 H, m), 3.03 - 3.12 (4 H, m), 3.50 - 3.66 (4 H, m), 3.88 (3 H, s), 6.37 (1 H, d, J=15.4 Hz), 7.67 - 7.78 (1 H, m), 8.08 (1 H, dd, J=7.3, 0.8 Hz), 8.18 - 8.29 (1 H, m), 8.76 (1 H, s), 9.01 (1 H, d, J=15.1 Hz), 9.32 (1 H, s) ppm.

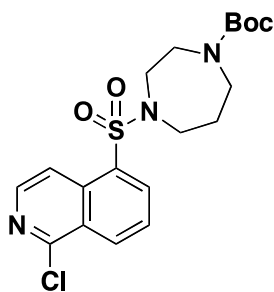

**tert-butyl 4-(1-chloroisoquinolin-5-ylsulfonyl)-1,4-diazepane-1-carboxylate (BRD2109).**  $^1\text{H}$  NMR (500 MHz, CHLOROFORM- $d$ )  $\delta$  = 1.45 (9 H, s), 1.94 - 2.05 (2 H, m), 3.34 - 3.47 (4 H, m), 3.50 - 3.65 (4 H, m), 7.13 - 7.23 (1 H, m), 7.24 - 7.31 (1 H, m), 7.74 - 7.82 (1 H, m), 8.31 - 8.41 (1 H, m), 8.41 - 8.49 (1 H, m), 8.66 (1 H, d,  $J$ =8.3 Hz) ppm.

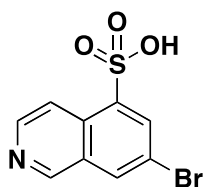

**7-bromoisoquinoline-5-sulfonic acid (12).**  $^1\text{H}$  NMR (300 MHz, DMSO- $d_6$ )  $\delta$  = 8.41 (1 H, d,  $J$ =2.3 Hz), 8.68 - 8.79 (2 H, m), 8.99 (1 H, d,  $J$ =6.6 Hz), 9.73 (1 H, s) ppm.

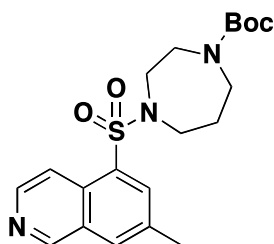

**tert-butyl 4-(7-methylisoquinolin-5-ylsulfonyl)-1,4-diazepane-1-carboxylate (13).**  $^1\text{H}$  NMR (300 MHz, CHLOROFORM- $d$ )  $\delta$  = 1.23 - 1.41 (9 H, m), 1.83 - 1.94 (2 H, m), 2.55 (3 H, s), 3.22 - 3.37 (4 H, m), 3.37 - 3.52 (4 H, m), 7.89 (1 H, s), 8.12 (1 H, d,  $J$ =11.3 Hz), 8.26 (1 H, d,  $J$ =6.2 Hz), 8.55 (1 H, d,  $J$ =5.7 Hz), 9.19 (1 H, s) ppm.

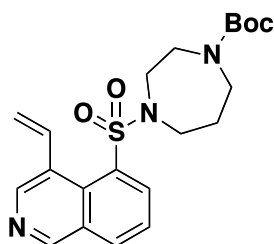

**tert-butyl 4-(4-vinylisoquinolin-5-ylsulfonyl)-1,4-diazepane-1-carboxylate (14).**  $^1\text{H}$  NMR (300 MHz, CHLOROFORM-*d*)  $\delta$  = 1.51 (9 H, s), 2.01 – 2.10 (2 H, m), 3.36 - 3.71 (8 H, m), 5.52 (1 H, dd,  $J=10.8, 1.2$  Hz), 5.68 (1 H, dd,  $J=16.9, 1.4$  Hz), 7.64 (1 H, t,  $J=7.7$  Hz), 7.80 - 8.04 (2 H, m), 8.19 (1 H, d,  $J=8.1$  Hz), 8.63 - 8.86 (1 H, m), 9.12 - 9.39 (1 H, m) ppm;  $^{13}\text{C}$  NMR (150 MHz, CHLOROFORM-*d*)  $\delta$  = 28.5, 28.6, 28.7, 28.9, 45.9, 46.4, 49.3, 50.5, 50.5, 51.9, 52.2, 80.2, 80.3, 117.6, 125.6, 125.6, 129.9, 130.2, 130.5, 134.4, 134.4, 136.3, 137.1, 146.7, 153.3, 155.5 ppm.

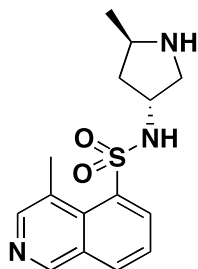

**4-methyl-*N*-((3*R*,5*R*)-5-methylpyrrolidin-3-yl)isoquinoline-5-sulfonamide (BRD5319).** To a solution of **22** (10 mg, 0.024 mmol, 1 equiv.) in dry THF (0.5 mL) was added triphenylphosphine (12.5 mg, 0.047 mmol, 2 equiv), imidazole (6.5 mg, 0.095 mmol, 4 equiv), and iodine (12 mg, 0.047 mmol, 2 equiv) at room temperature. The mixture was refluxed for 2 h. The solvent was evaporated and the residue was dissolved in EA (10 mL), washed with  $\text{Na}_2\text{S}_2\text{O}_3$  (aq.), dried over sodium sulfate, and concentrated. The residue was further subjected to hydrogenation and deprotection as described in the general procedure to afford **BRD5319** (4.1 mg, 57% yield over 3 steps), which is purified by prep-HPLC.  $^1\text{H}$  NMR (500 MHz, CHLOROFORM-*d*)  $\delta$  = 1.19 (3 H, d,  $J=6.3$  Hz), 1.26 (2 H, t,  $J=7.1$  Hz), 1.69 (1 H, ddd,  $J=13.4, 8.3, 8.1$  Hz), 2.94 (1 H, dd,  $J=11.2, 4.9$  Hz), 3.09 (3 H, s), 3.37 - 3.48 (2 H, m), 3.74 (1 H, q,  $J=6.8$  Hz), 3.94 - 4.04 (1 H, m), 7.64 (1 H, t,  $J=7.8$  Hz), 8.18 (1 H, d,  $J=7.8$  Hz), 8.51 (1 H, d,  $J=7.3$  Hz), 8.57 (1 H, s), 9.17 (1 H, s) ppm.

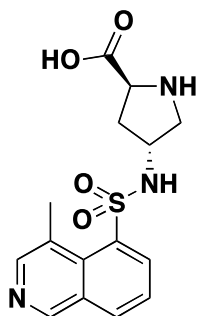

**(2*S*,4*R*)-4-(4-methylisoquinoline-5-sulfonamido)pyrrolidine-2-carboxylic acid (BRD7953).** To a 4 mL capped vial were added alcohol **22** (14.8 mg, 0.035 mmol, 1 equiv.), TEMPO (1.1 mg, 0.007 mmol, 0.2 equiv.), and bis-acetoxy-iodobenzene (BAIB) (30 mg, 0.093 mmol, 2.7 equiv.) in 0.5 mL acetonitrile/water (1:1). The reaction mixture

was stirred for 2 h and quenched with a saturated aqueous Na<sub>2</sub>SO<sub>3</sub> solution (3 mL). Acetonitrile was evaporated under reduced pressure, acidified with a 1 M HCl solution (pH~3). The acidic aqueous phase was extracted three times with EA. The combined organic extracts were dried over sodium sulfate, filtered, and evaporated *in vacuo* to yield an oily residue that was subjected to TFA/CH<sub>2</sub>Cl<sub>2</sub> (1:1) directly. Final product **BRD7953** (0.8 mg, 7% yield over two steps) was purified by prep-HPLC. <sup>1</sup>H NMR (300 MHz, MeOD) δ = 1.27 (1 H, s), 1.91 (1 H, d, J=1.1 Hz), 2.41 (2 H, dd, J=7.5, 6.6 Hz), 3.01 - 3.06 (3 H, m), 3.95 (1 H, d, J=6.2 Hz), 4.10 (1 H, s), 7.74 - 7.82 (1 H, m), 8.32 - 8.38 (1 H, m), 8.38 - 8.43 (1 H, m), 8.45 (1 H, s), 9.17 (1 H, s) ppm.

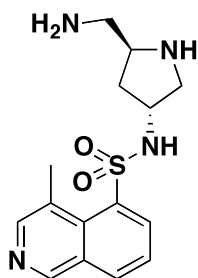

***N*-((3*R*,5*S*)-5-(aminomethyl)pyrrolidin-3-yl)-4-methylisoquinoline-5-sulfonamide (BRD9949)**. <sup>1</sup>H NMR (500 MHz, METHANOL-*d*<sub>4</sub>) δ = 1.76 - 1.89 (1 H, m), 2.11 (1 H, s), 2.62 - 2.76 (2 H, m), 2.98 (1 H, dd, J=11.5, 5.1 Hz), 3.09 (3 H, s), 3.19 (1 H, dd, J=11.5, 6.1 Hz), 3.35 - 3.44 (1 H, m), 3.81 - 3.92 (1 H, m), 7.80 (1 H, t, J=7.8 Hz), 8.37 (1 H, d, J=8.3 Hz), 8.45 - 8.55 (2 H, m), 9.21 (1 H, s) ppm.

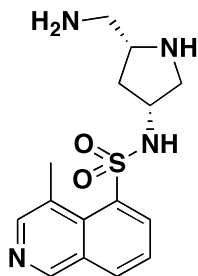

***N*-((3*R*,5*R*)-5-(aminomethyl)pyrrolidin-3-yl)-4-methylisoquinoline-5-sulfonamide (BRD7071)**. <sup>1</sup>H NMR (300 MHz, MeOD) δ = 2.69 - 2.74 (1 H, m), 2.85 (1 H, d, J=7.3 Hz), 3.01 - 3.07 (3 H, m), 3.10 - 3.19 (2 H, m), 3.78 (2 H, s), 7.71 - 7.80 (1 H, m), 8.33 (1 H, d, J=8.3 Hz), 8.44 (1 H, s), 8.46 - 8.53 (1 H, m), 9.16 (1 H, s) ppm; <sup>13</sup>C NMR (150 MHz, MeOD) δ = 20.9, 34.9, 36.2, 52.0, 52.3, 54.9, 55.0, 58.8, 63.8, 125.7, 125.8, 128.5, 130.6, 132.5, 132.6, 134.6, 134.6, 137.5, 137.6, 146.7, 151.7 ppm.

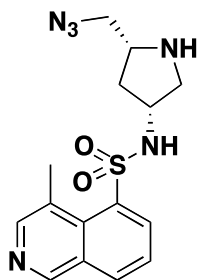

***N*-((3*R*,5*R*)-5-(azidomethyl)pyrrolidin-3-yl)-4-methylisoquinoline-5-sulfonamide (BRD2880).** <sup>1</sup>H NMR (500 MHz, CHLOROFORM-*d*)  $\delta$  = 2.31 - 2.39 (1 H, m), 3.02 - 3.10 (2 H, m), 3.12 (3 H, s), 3.37 - 3.45 (2 H, m), 3.49 - 3.56 (1 H, m), 3.96 (1 H, d, *J*=3.4 Hz), 5.38 (1 H, d, *J*=8.3 Hz), 7.65 (1 H, t, *J*=7.8 Hz), 8.20 (1 H, d, *J*=8.3 Hz), 8.56 - 8.63 (2 H, m), 9.18 (1 H, s) ppm.

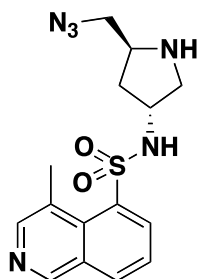

***N*-((3*R*,5*S*)-5-(azidomethyl)pyrrolidin-3-yl)-4-methylisoquinoline-5-sulfonamide (BRD3192).** <sup>1</sup>H NMR (300 MHz, CHLOROFORM-*d*)  $\delta$  = 1.96 - 2.08 (2 H, m), 3.00 (1 H, dd, *J*=11.2, 4.6 Hz), 3.09 (3 H, s), 3.26 (2 H, dt, *J*=11.7, 5.9 Hz), 3.31 - 3.40 (1 H, m), 3.50 - 3.60 (1 H, m), 3.94 - 4.03 (1 H, m), 7.64 (1 H, t, *J*=7.8 Hz), 8.20 (1 H, dd, *J*=8.2, 1.2 Hz), 8.51 (1 H, dd, *J*=7.5, 1.3 Hz), 8.57 (1 H, s), 9.18 (1 H, s) ppm; <sup>13</sup>C NMR (75 MHz, CHLOROFORM-*d*)  $\delta$  = 21.7, 36.5, 53.0, 54.9, 55.6, 56.0, 124.9, 127.1, 130.2, 132.2, 132.8, 134.9, 148.7, 152.1 ppm.

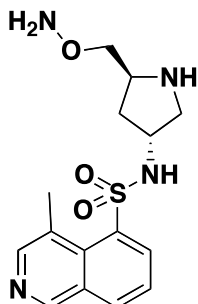

***N*-((3*R*,5*S*)-5-(aminooxymethyl)pyrrolidin-3-yl)-4-methylisoquinoline-5-sulfonamide (BRD7569).** <sup>1</sup>H NMR (500 MHz, METHANOL-*d*<sub>4</sub>)  $\delta$  = 1.87 - 1.96 (1 H, m), 2.00 - 2.08 (1 H, m), 2.92 (1 H, dd, *J*=11.2, 5.9 Hz), 3.08 (3 H, s), 3.25 (1 H, dd, *J*=11.5, 6.1 Hz),

3.52 - 3.62 (2 H, m), 3.63 - 3.69 (1 H, m), 3.83 - 3.90 (1 H, m), 7.79 (1 H, t, J=7.8 Hz), 8.36 (1 H, d, J=8.3 Hz), 8.48 (1 H, s), 8.51 (1 H, d, J=7.3 Hz), 9.19 (1 H, s) ppm.

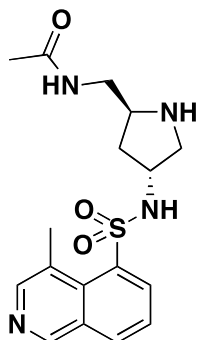

***N*-(((2*S*,4*R*)-4-(4-methylisoquinoline-5-sulfonamido)pyrrolidin-2-yl)methyl)acetamide (BRD8899).** <sup>1</sup>H NMR (500 MHz, METHANOL-*d*<sub>4</sub>)  $\delta$  = 1.78 - 1.87 (1 H, m), 1.93 (3 H, s), 1.98 - 2.06 (1 H, m), 2.87 (1 H, dd, J=11.2, 5.9 Hz), 3.05 - 3.08 (3 H, m), 3.17 - 3.28 (3 H, m), 3.38 - 3.46 (1 H, m), 3.81 - 3.88 (1 H, m), 7.78 (1 H, t, J=7.8 Hz), 8.35 (1 H, d, J=8.3 Hz), 8.46 (1 H, s), 8.49 (1 H, d, J=6.3 Hz), 9.18 (1 H, s) ppm; <sup>13</sup>C NMR (150 MHz, METHANOL-*d*<sub>4</sub>)  $\delta$  = 22.2, 22.7, 37.5, 44.6, 54.2, 55.9, 58.4, 127.0, 129.9, 132.0, 133.8, 133.8, 135.9, 138.8, 148.0, 153.0, 173.8 ppm.

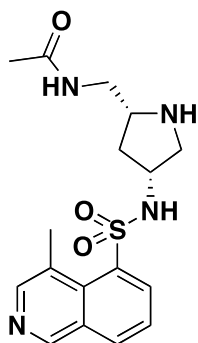

***N*-(((2*R*,4*R*)-4-(4-methylisoquinoline-5-sulfonamido)pyrrolidin-2-yl)methyl)acetamide (BRD5749).** <sup>1</sup>H NMR (500 MHz, METHANOL-*d*<sub>4</sub>)  $\delta$  = 1.52 (1 H, dd, J=8.1, 5.1 Hz), 1.91 - 1.98 (3 H, m), 2.26 - 2.38 (1 H, m), 2.86 - 2.92 (1 H, m), 3.02 - 3.06 (3 H, m), 3.11 (1 H, dd, J=11.2, 6.8 Hz), 3.19 (1 H, dd, J=14.9, 8.1 Hz), 3.23 - 3.28 (2 H, m), 3.80 (1 H, t, J=7.3 Hz), 7.75 (1 H, t, J=7.8 Hz), 8.32 (1 H, d, J=7.8 Hz), 8.44 (1 H, s), 8.47 (1 H, d, J=7.3 Hz), 9.15 (1 H, s) ppm.

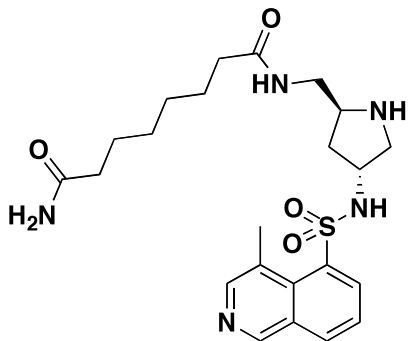

***N*<sup>1</sup>-(((2*S*,4*R*)-4-(4-methylisoquinoline-5-sulfonamido)pyrrolidin-2-yl)methyl)octane-diamide (BRD4717).** To bis(2,5-dioxypyrrolidin-1-yl) octanedioate **21** (10 equiv.) dissolved in 1 mL DMF was added amine **24**, which was obtained by hydrogenation of azide **24** (11 mg, 0.024 mmol, 1 equiv.). The reaction mixture was stirred at room temperature overnight, after which ammonia (2 mL, 1 mmol, 0.5 M in THF) was added. The reaction mixture was stirred at room temperature for 2 h and volatiles were removed under reduced pressure to yield an oily residue. The residue was subjected to TFA/CH<sub>2</sub>Cl<sub>2</sub> (1:1) directly, and the final product **BRD4717** (4 mg, 34% yield over four steps) was purified by prep-HPLC. <sup>1</sup>H NMR (500 MHz, CHLOROFORM-*d*) δ = 1.39 (3 H, td, *J*=12.0, 6.3 Hz), 1.49 - 1.56 (5 H, m), 1.56 - 1.73 (36 H, m), 2.18 (2 H, dddd, *J*=8.3, 5.6, 5.4, 2.7 Hz), 2.22 - 2.30 (3 H, m), 2.81 - 2.87 (1 H, m), 2.90 - 2.92 (3 H, m), 2.97 - 3.00 (3 H, m), 3.04 (1 H, dd, *J*=12.0, 4.6 Hz), 3.08 - 3.11 (3 H, m), 3.15 (1 H, d, *J*=12.2 Hz), 3.56 - 3.62 (2 H, m), 3.94 (1 H, ddd, *J*=4.5, 2.4, 2.3 Hz), 5.50 - 5.55 (1 H, m), 6.02 - 6.08 (1 H, m), 6.19 (1 H, dd, *J*=6.3, 4.4 Hz), 7.65 (1 H, t, *J*=7.8 Hz), 8.04 (1 H, s), 8.19 (1 H, d, *J*=8.3 Hz), 8.49 (1 H, d, *J*=6.3 Hz), 8.56 (1 H, s), 9.17 (1 H, s) ppm.

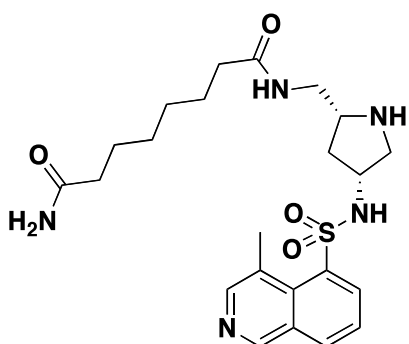

***N*<sup>1</sup>-(((2*R*,4*R*)-4-(4-methylisoquinoline-5-sulfonamido)pyrrolidin-2-yl)methyl)octane-diamide (BRD1469).** To bis(2,5-dioxypyrrolidin-1-yl) octanedioate **21** (10 equiv.) dissolved in 1 mL DMF, was added amine **19**, which was obtained by hydrogenation of azide **18** (6.7 mg, 0.015 mmol, 1 equiv.). The reaction mixture was stirred at room temperature overnight, after which ammonia (2 mL, 1 mmol, 0.5 M in THF) was added. The reaction mixture was stirred at room temperature for 2 h and volatiles were removed under reduced pressure to yield an oily residue. The residue was subjected to TFA/CH<sub>2</sub>Cl<sub>2</sub> (1:1) directly, and the final product **BRD1469** (3.4 mg, 48% yield over four steps) was purified by prep-HPLC. <sup>1</sup>H NMR (500 MHz, CHLOROFORM-*d*) δ = 1.34 -

1.47 (4 H, m), 1.54 (2 H, d, J=9.3 Hz), 1.64 (14 H, br. s.), 1.67 - 1.87 (7 H, m), 2.19 - 2.34 (5 H, m), 3.02 - 3.13 (4 H, m), 3.23 (1 H, dd, J=11.2, 6.3 Hz), 3.30 - 3.43 (2 H, m), 3.47 - 3.56 (1 H, m), 3.84 - 3.93 (1 H, m), 5.53 (1 H, br. s.), 6.05 (1 H, br. s.), 6.32 (1 H, d, J=4.9 Hz), 7.65 (1 H, t, J=7.8 Hz), 8.17 (1 H, d, J=7.8 Hz), 8.48 (1 H, d, J=7.3 Hz), 8.56 (1 H, s), 9.16 (1 H, s) ppm.

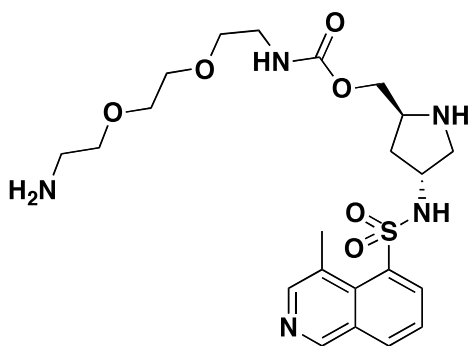

**((2*S*,4*R*)-4-(4-methylisoquinoline-5-sulfonamido)pyrrolidin-2-yl)methyl 2-(2-(2-aminoethoxy)ethoxy)ethylcarbamate (BRD0200).** Compound **BRD0200** was synthesized following known procedure.<sup>4</sup> <sup>1</sup>H NMR (500 MHz, CHLOROFORM-*d*)  $\delta$  = 1.83 (2 H, dd, J=14.4, 7.1 Hz), 1.91 - 2.15 (13 H, m), 2.91 (2 H, t, J=5.1 Hz), 2.99 - 3.08 (2 H, m), 3.10 (3 H, s), 3.23 (1 H, dd, J=11.2, 5.4 Hz), 3.39 (2 H, q, J=5.0 Hz), 3.51 - 3.61 (4 H, m), 3.61 - 3.69 (6 H, m), 3.92 - 4.00 (2 H, m), 4.06 (1 H, dd, J=11.2, 4.4 Hz), 5.56 (1 H, br. s.), 7.65 (1 H, t, J=7.6 Hz), 8.19 (1 H, d, J=6.8 Hz), 8.51 (1 H, d, J=6.3 Hz), 8.57 (1 H, s), 9.17 (1 H, s) ppm.

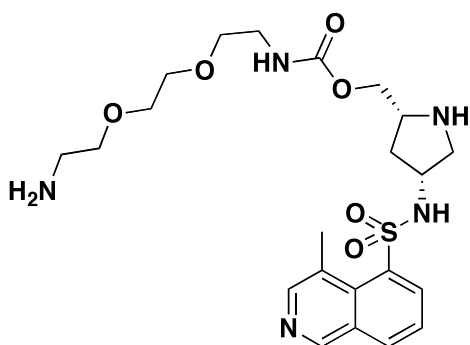

**((2*R*,4*R*)-4-(4-methylisoquinoline-5-sulfonamido)pyrrolidin-2-yl)methyl 2-(2-(2-aminoethoxy)ethoxy)ethylcarbamate (BRD8254).** Compound **BRD8254** was synthesized following known procedure.<sup>4</sup> <sup>1</sup>H NMR (300 MHz, MeOD)  $\delta$  = 2.33 (1 H, s), 2.78 - 2.92 (3 H, m), 2.99 - 3.08 (3 H, m), 3.09 - 3.19 (1 H, m), 3.48 - 3.59 (4 H, m), 3.59 - 3.65 (4 H, m), 3.80 (1 H, d, J=7.5 Hz), 3.96 - 4.11 (2 H, m), 7.72 - 7.82 (1 H, m), 8.31 - 8.38 (1 H, m), 8.42 - 8.54 (2 H, m), 9.17 (1 H, s) ppm.



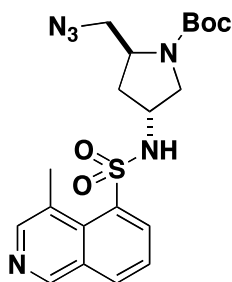

**(2S,4R)-tert-butyl 2-(azidomethyl)-4-(4-methylisoquinoline-5-sulfonamido)pyrrolidine-1-carboxylate (23).**  $^1\text{H}$  NMR (300 MHz, CHLOROFORM-d)  $\delta$  = 1.45 (9 H, s), 2.01 - 2.07 (1 H, m), 2.07 - 2.29 (2 H, m), 2.97 - 3.08 (3 H, m), 3.23 - 3.35 (1 H, m), 3.35 - 3.60 (1 H, m), 3.60 - 3.70 (1 H, m), 3.96 - 4.20 (3 H, m), 5.87 - 6.08 (1 H, m), 7.60 (1 H, t,  $J=7.5$  Hz), 8.16 (1 H, d,  $J=8.3$  Hz), 8.44 (1 H, d,  $J=6.6$  Hz), 8.48 - 8.64 (1 H, m), 9.00 - 9.32 (1 H, m) ppm;  $^{13}\text{C}$  NMR (75 MHz, CHLOROFORM-d)  $\delta$  = 13.7, 14.2, 21.1, 21.7, 28.4, 30.7, 55.2, 60.4, 64.4, 124.9, 132.2, 132.4, 134.9, 136.6, 148.5, 152.0 ppm.

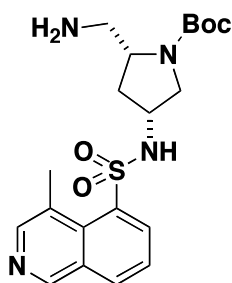

**(2R,4R)-tert-butyl 2-(aminomethyl)-4-(4-methylisoquinoline-5-sulfonamido)pyrrolidine-1-carboxylate (19).**  $^1\text{H}$  NMR (300 MHz, MeOD)  $\delta$  = 1.43 (9 H, s), 1.85 - 1.97 (1 H, m), 2.42 - 2.53 (1 H, m), 3.06 (3 H, s), 3.71 - 3.87 (3 H, m), 7.72 - 7.80 (1 H, m), 8.33 (1 H, d,  $J=8.1$  Hz), 8.44 (1 H, s), 8.51 (1 H, d,  $J=7.7$  Hz), 9.16 (1 H, s) ppm.

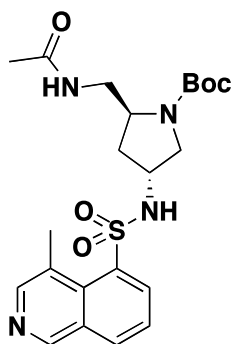

**(2S,4R)-tert-butyl 2-(acetamidomethyl)-4-(4-methylisoquinoline-5-sulfonamido)pyrrolidine-1-carboxylate (BRD2816).**  $^1\text{H}$  NMR (500 MHz, CHLOROFORM-d)  $\delta$  = 1.19 - 1.32 (1 H, m), 1.46 (9 H, br. s.), 1.94 (3 H, s), 2.01 - 2.09 (1 H, m), 2.16 - 2.27 (1 H, m), 3.07 (3 H, s), 3.15 - 3.26 (1 H, m), 3.33 - 3.45 (1 H, m), 3.45 - 3.55 (1 H, m), 3.55 - 3.71

(1 H, m), 3.94 - 4.17 (2 H, m), 6.00 - 6.16 (1 H, m), 7.13 (1 H, d, J=3.9 Hz), 7.66 (1 H, t, J=7.6 Hz), 8.20 (1 H, d, J=7.8 Hz), 8.47 (1 H, d, J=7.3 Hz), 8.50 - 8.66 (1 H, m), 9.06 - 9.29 (1 H, m) ppm.

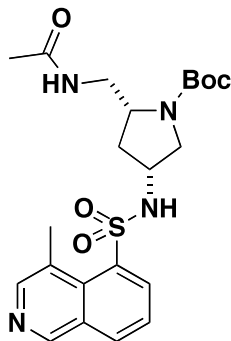

**(2R,4R)-tert-butyl 2-(acetamidomethyl)-4-(4-methylisoquinoline-5-sulfonamido) pyrrolidine-1-carboxylate (33).**  $^1\text{H}$  NMR (500 MHz, CHLOROFORM-d)  $\delta$  = 1.37 - 1.54 (9 H, m), 2.01 - 2.12 (4 H, m), 2.25 - 2.38 (1 H, m), 3.03 - 3.15 (3 H, m), 3.50 - 3.73 (4 H, m), 3.93 (1 H, br. s.), 4.03 (1 H, d, J=6.3 Hz), 6.73 (1 H, br. s.), 7.62 (1 H, t, J=7.6 Hz), 7.96 (1 H, br. s.), 8.15 (1 H, d, J=8.3 Hz), 8.38 (1 H, d, J=6.3 Hz), 8.56 (1 H, s), 9.15 (1 H, s) ppm;  $^{13}\text{C}$  NMR (150 MHz, CHLOROFORM-d)  $\delta$  = 22.0, 23.5, 28.7, 28.8, 34.1, 44.0, 53.3, 54.3, 56.5, 80.8, 125.1, 127.9, 130.4, 131.5, 132.6, 134.6, 137.1, 148.6, 148.7, 152.1, 172.3 ppm.

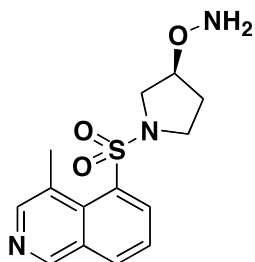

**(S)-O-(1-(4-methylisoquinolin-5-ylsulfonyl)pyrrolidin-3-yl)hydroxylamine (BRD2916).**  $^1\text{H}$  NMR (300 MHz, CHLOROFORM-d)  $\delta$  = 2.05 - 2.25 (2 H, m), 2.25 - 2.37 (1 H, m), 2.94 - 3.13 (4 H, m), 3.48 - 3.68 (3 H, m), 3.68 - 3.86 (2 H, m), 4.40 - 4.52 (1 H, m), 5.43 - 5.60 (2 H, m), 7.56 - 7.69 (1 H, m), 8.12 - 8.30 (2 H, m), 8.56 (1 H, s), 9.16 (1 H, s) ppm.

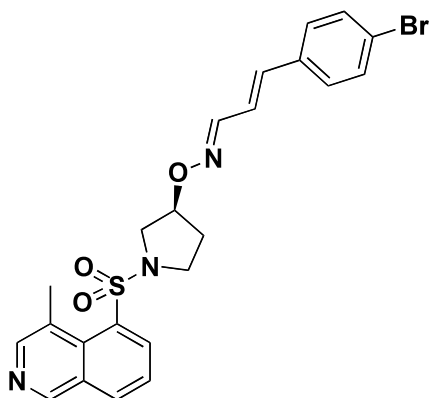

**(1E,2E)-3-(4-bromophenyl)acrylaldehyde O-(S)-1-(4-methylisoquinolin-5-ylsulfonyl)pyrrolidin-3-yl oxime (BRD6284).** To the solution of oxyamine **BRD2916** (1 equiv.) and trans-4-Bromocinnamaldehyde (1 equiv.) in dry methanol, was added a catalytic amount of acetic acid (0.1 equiv.). The mixture was stirred overnight under 50 °C, after which the solution was concentrated and the product was purified by prep-HPLC. <sup>1</sup>H NMR (500 MHz, METHANOL-d<sub>4</sub>) δ = 2.42 (2 H, br. s.), 3.07 (3 H, s), 3.65 (2 H, d, J=7.8 Hz), 3.77 (2 H, d, J=3.9 Hz), 3.83 (2 H, s), 6.95 (1 H, d, J=9.8 Hz), 7.01 - 7.07 (1 H, m), 7.48 (2 H, m), 7.55 (2 H, m), 7.76 (1 H, s), 8.17 (1 H, d, J=9.8 Hz), 8.32 - 8.38 (2 H, m), 8.48 (1 H, s), 9.19 (1 H, s) ppm.

#### References:

1. Liu Z, Larock RC (2006) Facile N-arylation of amines and sulfonamides and o-arylation of phenols and arenecarboxylic acids. *J Org Chem* 71:3198-3209.
2. Vo GD, Hartwig JF (2009) Palladium-catalyzed coupling of ammonia with aryl chlorides, bromides, iodides, and sulfonates: a general method for the preparation of primary arylamines. *J Am Chem Soc* 131:11049-11061.
3. Joseph S, Li R, Myers MR, Aburub A, Dai JP, Schmid CR (2007) *PCT Int Appl WO* 2007149730 A2 20071227.
4. Wang X, Imber BS, Schreiber SL (2008) Small-molecule reagents for cellular pull-down experiments. *Bioconjugate Chem* 19:585-587.
